# Supplementary material for: How the nature and charge of metal cations affect vibrations in acetone solvent molecules
Source: Royal Society of Chemistry journal article supplement (doi:10.1039/d3cp05204d), 2023-12-22
Supplement: d3cp05204d1.pdf [file d3cp05204d1.pdf]

**Supporting information for:**

**How the nature and charge of metal cations affect vibrations in acetone solvent molecules**

Apakorn Phasuk,<sup>a</sup> Joel Lemaire,<sup>b</sup> Vincent Steinmetz<sup>b</sup>, Philippe Maître<sup>b</sup> and Ricardo B. Metz<sup>\*a</sup>

*a) Department of Chemistry, University of Massachusetts Amherst, Amherst, MA 01003, USA. E-mail: rbmetz@chem.umass.edu*

*b) Laboratoire de Chimie Physique, Université de Paris XI, Orsay, France. E-mail: philippe.maitre@u-psud.fr*

Experimental and calculated vibrational spectra of low-lying isomers of  $\text{Ni}^{2+}(\text{Ace})_4$  in triplet and singlet states (Fig. S1); Mass spectrum (Fig. S2); Mass-gated mass spectrum (top) and difference mass spectrum (bottom) of  $\text{Cu}^+(\text{Ace})(\text{N}_2)_2$  losing  $\text{N}_2$  (Fig. S3); Correlation of red shift in C=O stretch frequency of  $\text{M}^+(\text{Ace})$  with ionic radius (Fig. S4); Correlation of red shift in C=O stretch frequency with change in populations in antibonding orbitals  $\Delta\sigma^*(\text{CO})$  (top) and  $\Delta\pi^*(\text{CO})$  (bottom) (Fig. S5); Correlation of red shift in C=O stretch frequency with hardness for closed-shell ions (Fig. S6); Experimental vibrational spectra highlighting the region below the carbonyl stretch and simulated spectra of low-lying isomers of  $\text{Cu}^+(\text{Ace})(\text{N}_2)_2$  and  $\text{Cu}^+(\text{Ace})_4$  (Fig. S7); Energies, geometries, vibrational frequencies and intensities of  $\text{Cu}^+(\text{Ace})(\text{N}_2)_k$  ( $k = 0-2$ ),  $\text{Cu}^+(\text{Ace})_4$  and  $\text{M}^{2+}(\text{Ace})_4$  ( $\text{M} = \text{Co}, \text{Ni}, \text{Cu}, \text{and Zn}$ ) at the B3LYP+D3/6-311+G(d,p) level of theory (Table S1) and  $\omega\text{B97X-D}/6-311+G(d,p)$  (Table S2); Calculated bond lengths and angles of  $\text{M}^{2+}(\text{Ace})_4$ ,  $\text{M} = \text{Co}, \text{Ni}, \text{Cu}, \text{and Zn}$ ,  $\text{Cu}^+(\text{Ace})_4$ ,  $\text{Cu}^+(\text{Ace})(\text{N}_2)_k$  ( $k = 0-2$ ) and  $\text{Al}^+(\text{Ace})(\text{N}_2)$  (Table S3, page 103); Properties of the metal cations and of the complexes calculated at the B3LYP+D3/6-311+G(d, p) (for  $Z < 37$ ) and B3LYP+D3/Def2-TZVP (for  $Z \geq 37$ ) level of theory (Table S4, page 104).

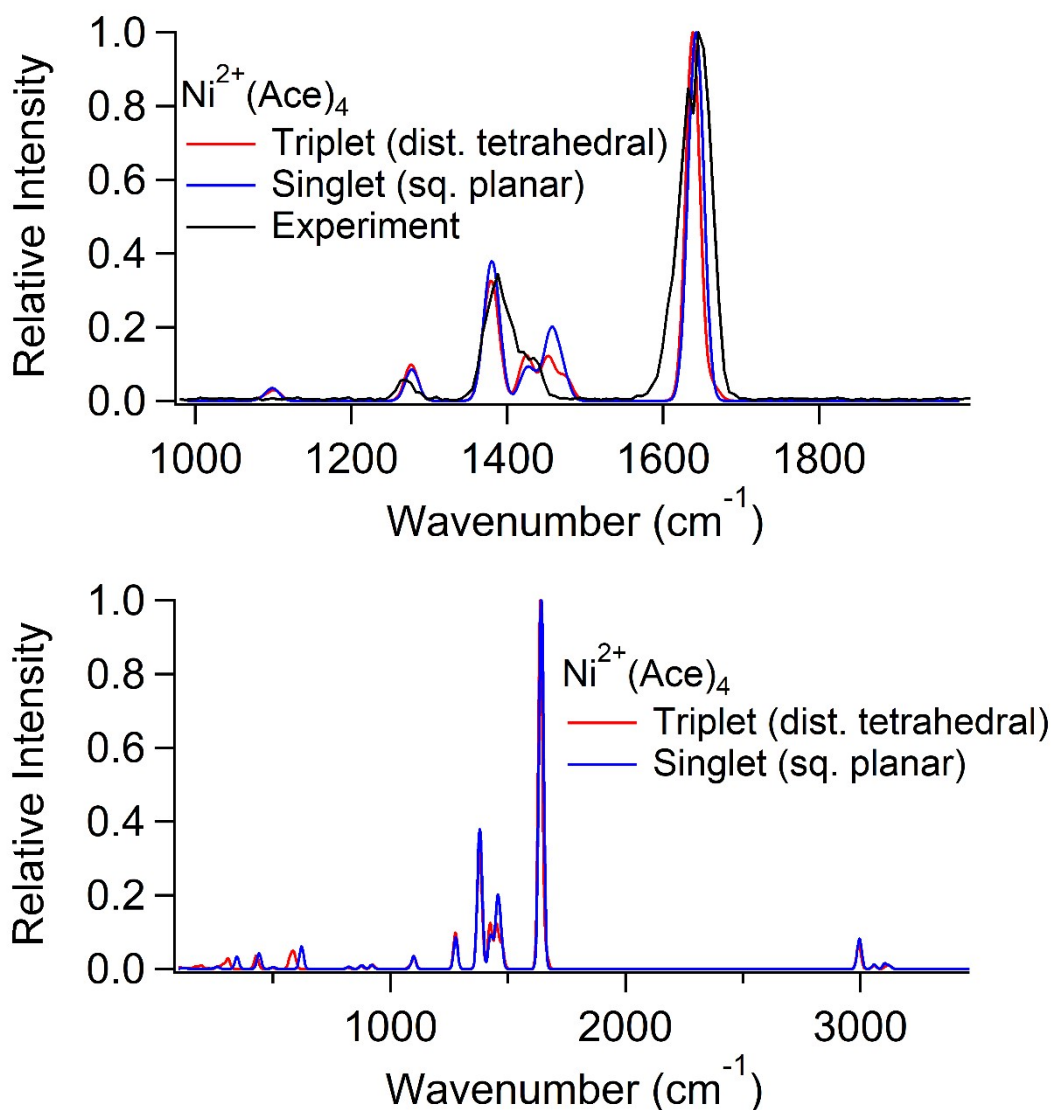

Figure S1. (top) Experimental photodissociation spectrum of  $\text{Ni}^{2+}(\text{Ace})_4$  (black). Simulated spectra of the lowest-lying isomer of  $\text{Ni}^{2+}(\text{Ace})_4$  in triplet state (red) and in singlet state (blue) at the B3LYP+D3/6-311+G(d,p) level of theory. (bottom) Simulated spectra of the lowest-lying isomer of  $\text{Ni}^{2+}(\text{Ace})_4$  in triplet state (red) and in singlet state (blue) from 100  $\text{cm}^{-1}$  to 3500  $\text{cm}^{-1}$  at the B3LYP+D3/6-311+G(d,p) level of theory.

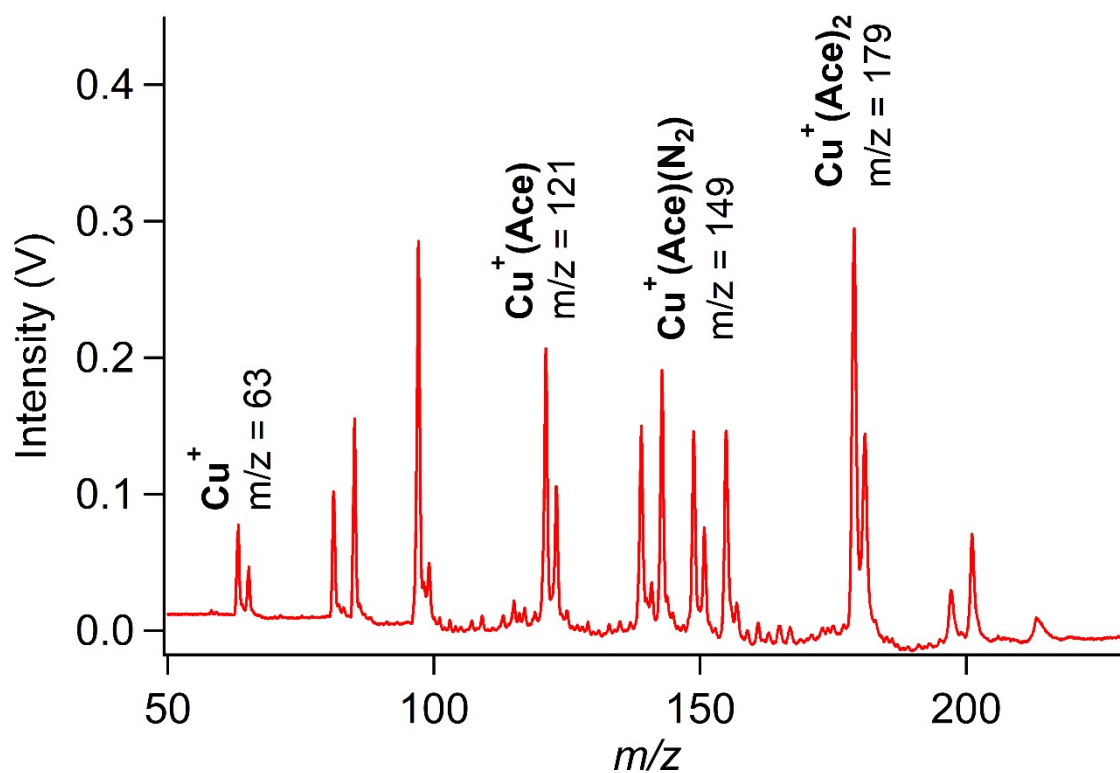

Figure S2. Mass spectrum of ions formed by ablating a copper rod in 0.08% acetone/10%  $\text{N}_2$ /He mixture. Copper-containing peaks are labeled. The labels indicate stoichiometry, not the structure. Other  $\text{M}^+(\text{Ace})_n$  ( $\text{M}=\text{Al}, \text{Na}, \text{K}$ ) are also observed.

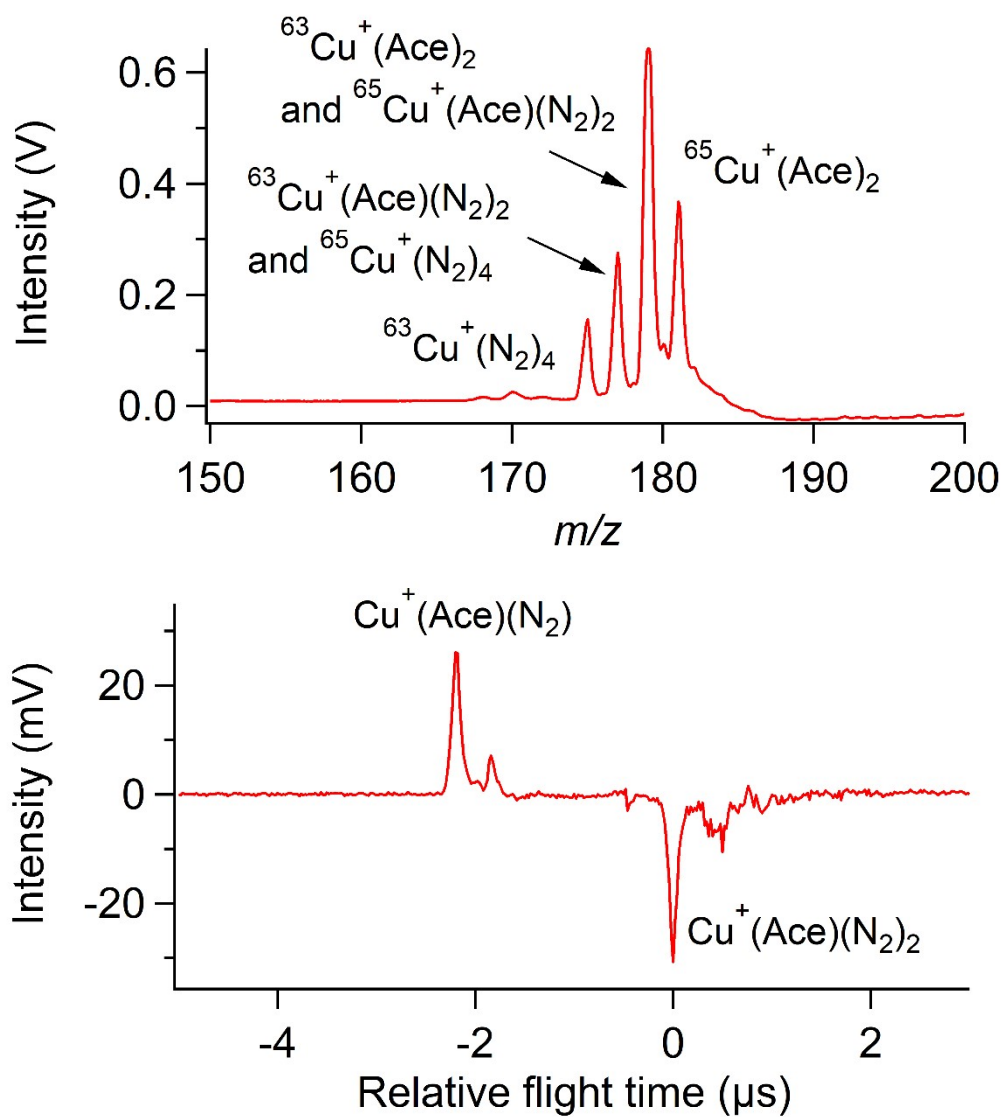

Figure S3. (top) Portion of the mass spectrum of ions formed by ablating a copper rod in 0.08% acetone/20%  $\text{N}_2/\text{He}$ . A mass gate is used to suppress the lighter ions. (bottom) Laser on – laser off difference mass spectrum measured at  $1679\text{ cm}^{-1}$  showing loss of  $\text{N}_2$  from  $\text{Cu}^+(\text{Ace})(\text{N}_2)_2$ .

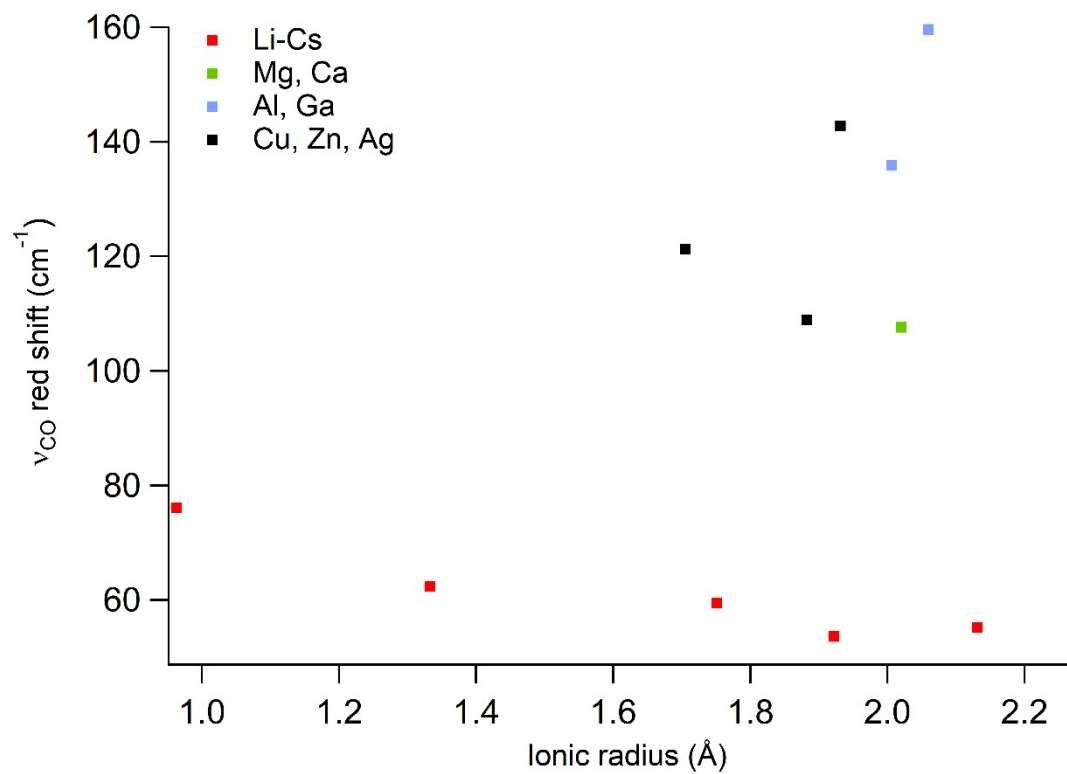

Figure S4. Correlation of red shift in C=O stretch frequency of  $M^+(\text{Ace})$  with ionic radius.

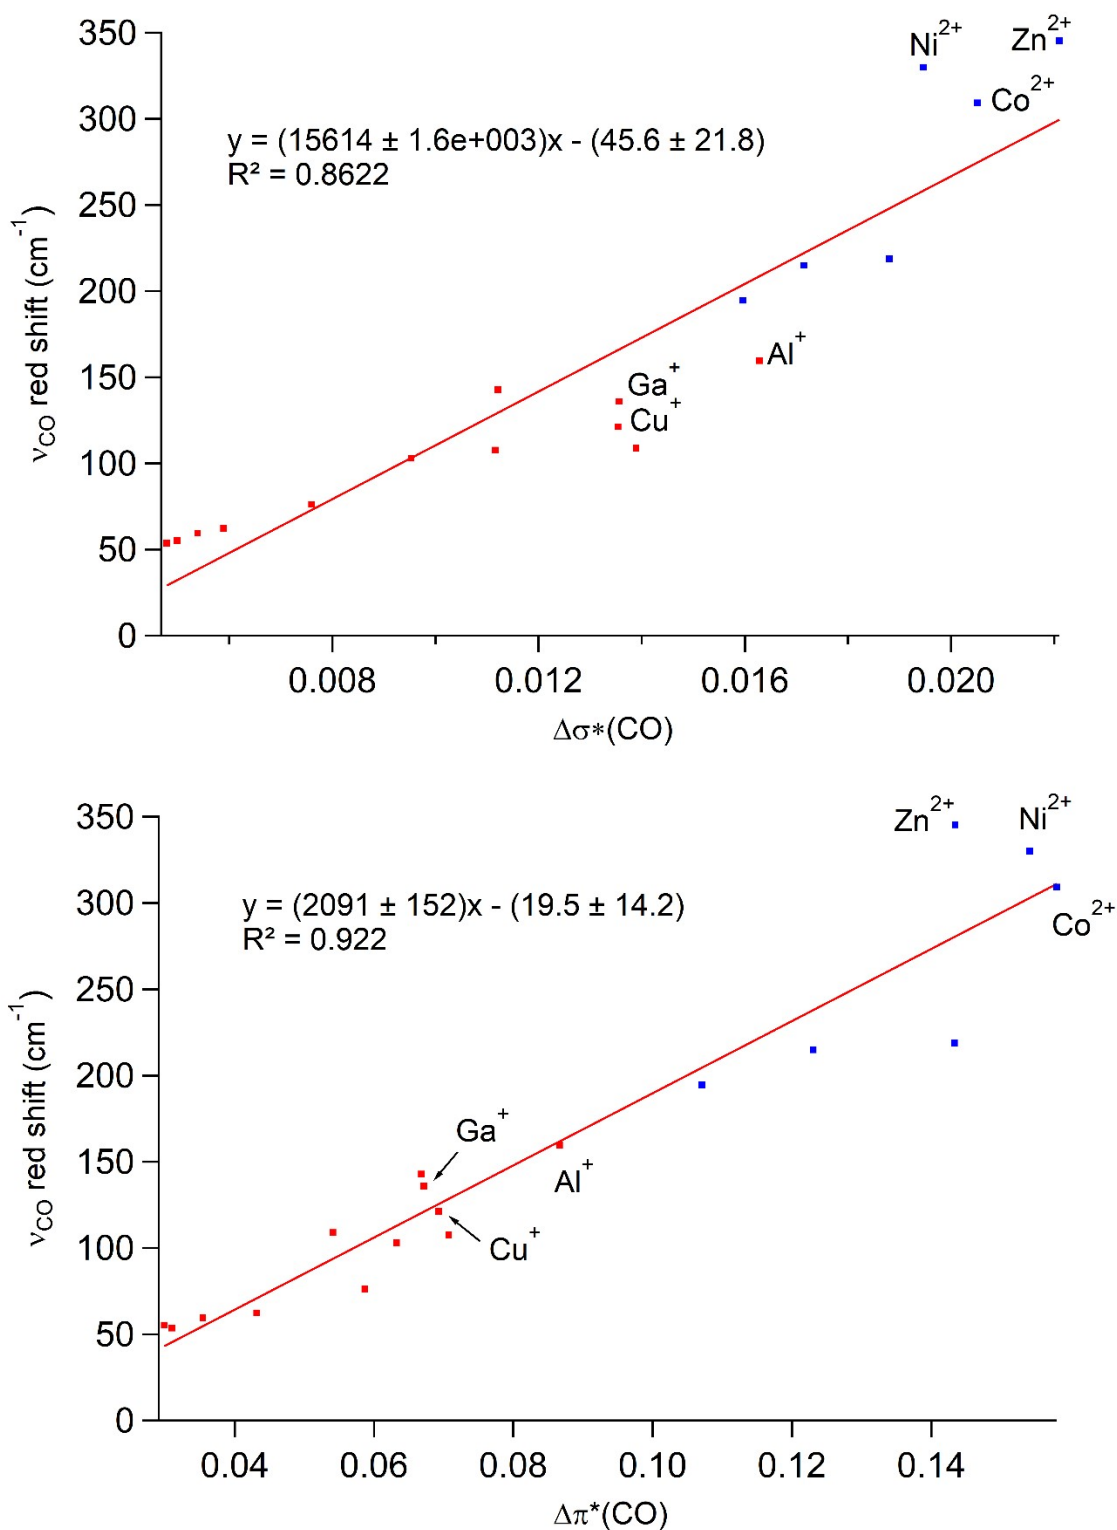

Figure S5. Correlation of red shift in C=O stretch frequency with change in populations in antibonding orbitals  $\Delta\sigma^*(\text{CO})$  (top) and  $\Delta\pi^*(\text{CO})$  (bottom). Cations are shown in red and dications in blue.

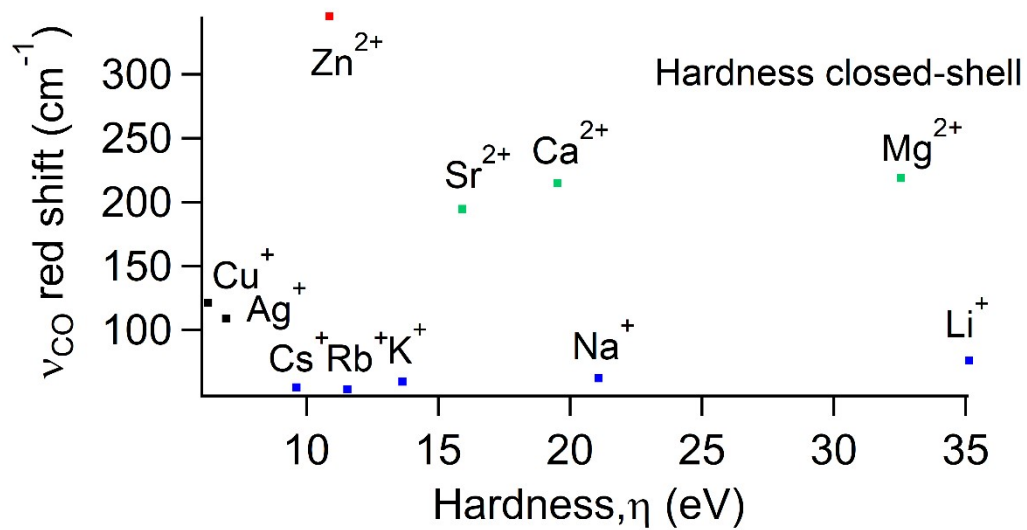

Figure S6. Correlation of red shift in C=O stretch frequency with hardness for closed-shell ions.

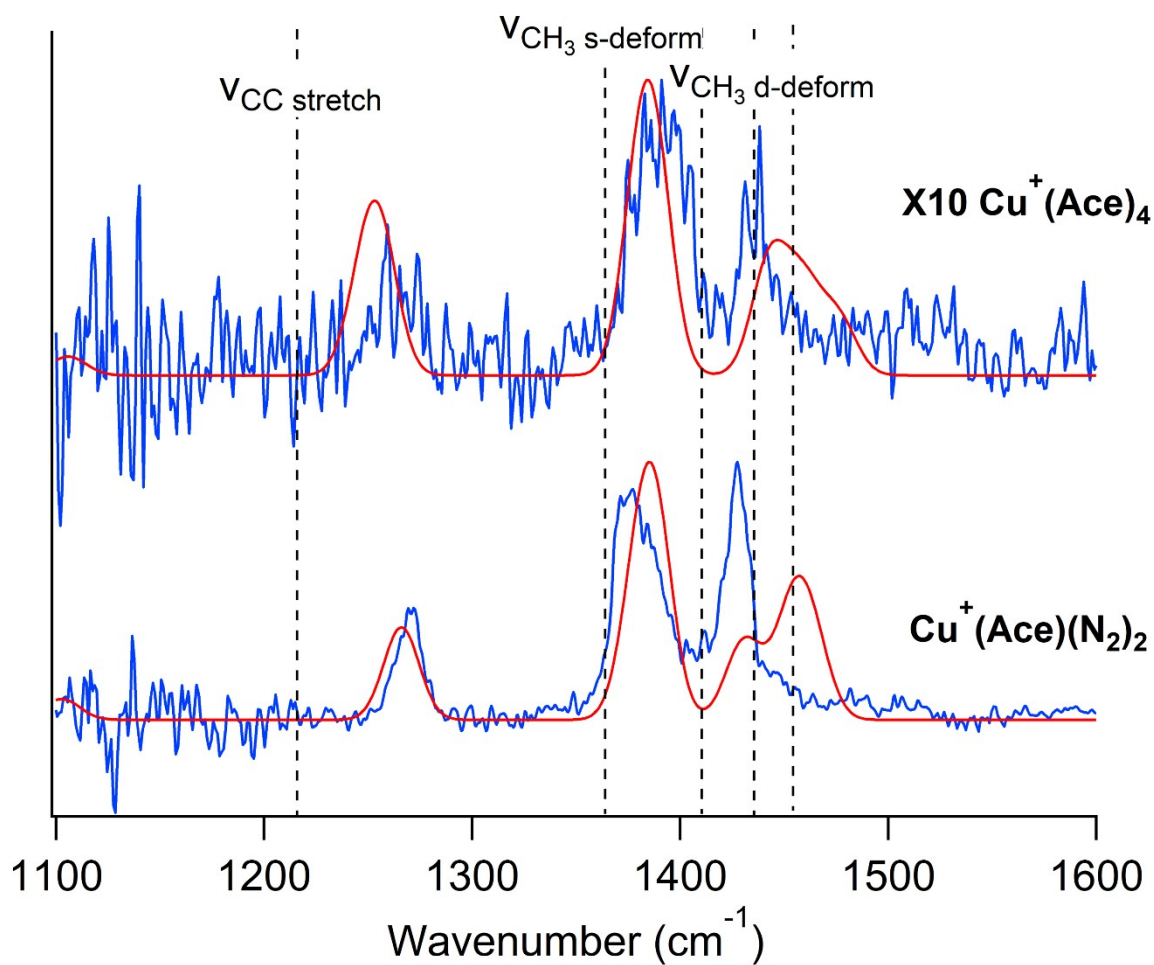

Figure S7. Experimental photodissociation spectrum of  $\text{Cu}^+(\text{Ace})(\text{N}_2)_2$  (blue) and ten times zoom in experimental photodissociation spectrum of  $\text{Cu}^+(\text{Ace})_4$  (blue). Simulated spectra of the lowest-lying isomer of  $\text{Cu}^+(\text{Ace})(\text{N}_2)_2$  and  $\text{Cu}^+(\text{Ace})_4$  at the B3LYP+D3/6-311+G(d,p) level of theory (red).



Table S1: Energies, unscaled vibrational frequencies, intensities (km/mol), and geometries (xyz coordinates) of  $\text{Cu}^+(\text{Ace})_n(\text{N}_2)_k$  ( $n = 1$  and  $4$ ,  $k = 0-2$ ) and  $\text{M}^{2+}(\text{Ace})_4$  ( $\text{M} = \text{Co}, \text{Ni}, \text{Cu},$  and  $\text{Zn}$ ) calculated at the B3LYP+D3/6-311+G(d,p) level of theory.

|                                             |                   |                            |                            |
|---------------------------------------------|-------------------|----------------------------|----------------------------|
| Molecule<br>Cu                              | Multiplicity<br>1 | E (no zpe)<br>-1640.176877 | E (w/ zpe)<br>-1640.176877 |
| Molecule<br>N <sub>2</sub>                  | Multiplicity<br>1 | E (no zpe)<br>-109.5596937 | E (w/ zpe)<br>-109.5541247 |
| Frequency<br>2444.4701                      | Intensity<br>0    |                            |                            |
| Atom                                        |                   | Standard Orientation       |                            |
| N                                           | 0.00000000        | 0.00000000                 | 0.00000000                 |
| N                                           | 0.00000000        | 0.00000000                 | -1.09557600                |
| Molecule<br>C <sub>3</sub> H <sub>6</sub> O | Multiplicity<br>1 | E (no zpe)<br>-193.2225414 | E (w/ zpe)<br>-193.1393914 |
| Frequency                                   | Intensity         |                            |                            |
| 27.1                                        | 0                 |                            |                            |
| 130.1                                       | 0.04              |                            |                            |
| 389.2                                       | 1.5               |                            |                            |
| 491.6                                       | 0.41              |                            |                            |
| 540.6                                       | 13.2              |                            |                            |
| 785.4                                       | 1.77              |                            |                            |
| 883.7                                       | 0.02              |                            |                            |
| 888.3                                       | 9.24              |                            |                            |
| 1085.1                                      | 0                 |                            |                            |
| 1116.2                                      | 2.56              |                            |                            |
| 1232.2                                      | 74.62             |                            |                            |
| 1385.8                                      | 22.72             |                            |                            |
| 1387.5                                      | 61.06             |                            |                            |
| 1460.3                                      | 1.3               |                            |                            |
| 1463.9                                      | 2.23              |                            |                            |
| 1470.6                                      | 28.63             |                            |                            |
| 1487.4                                      | 24.02             |                            |                            |
| 1787.1                                      | 210.38            |                            |                            |
| 3021                                        | 1.43              |                            |                            |
| 3027.9                                      | 6.88              |                            |                            |
| 3077                                        | 0.24              |                            |                            |

|        |       |
|--------|-------|
| 3084.4 | 19.96 |
| 3137.5 | 12.32 |
| 3138.7 | 7.28  |

| Atom | Standard Orientation |             |             |
|------|----------------------|-------------|-------------|
| C    | 0.00000000           | 0.00000000  | 0.00000000  |
| C    | 0.00000000           | -1.28890000 | -0.80043500 |
| O    | 0.00000000           | -1.28890000 | -2.01182700 |
| C    | 0.00000000           | -2.57780000 | 0.00000000  |
| H    | -0.83942800          | -2.59138200 | 0.70227200  |
| H    | -0.06190700          | -3.43433400 | -0.66992100 |
| H    | 0.91588300           | -2.64369400 | 0.59661100  |
| H    | -0.91588300          | 0.06589400  | 0.59661100  |
| H    | 0.83942800           | 0.01358200  | 0.70227200  |
| H    | 0.06190700           | 0.85653400  | -0.66992100 |

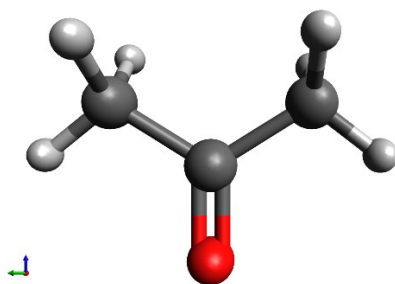


---

| Molecule              | Multiplicity | E (no zpe)   | E (w/ zpe)   |
|-----------------------|--------------|--------------|--------------|
| Cu <sup>+</sup> (Ace) | 1            | -1833.488851 | -1833.404157 |

| Frequency | Intensity |
|-----------|-----------|
| 94.1      | 5.9       |
| 106.1     | 0.83      |
| 115.2     | 5.66      |
| 140.3     | 7.07      |
| 283.1     | 3.32      |
| 428.5     | 4.87      |
| 496       | 0.53      |
| 588.3     | 19.05     |
| 825.7     | 0.3       |
| 886.8     | 1.44      |
| 931.5     | 5.68      |
| 1093      | 1.28      |
| 1110.1    | 10.53     |
| 1283.2    | 31.88     |
| 1389.4    | 41.73     |

|        |        |
|--------|--------|
| 1399.5 | 79.19  |
| 1437.4 | 36.48  |
| 1448.8 | 7      |
| 1468.3 | 40.43  |
| 1477.9 | 31.52  |
| 1665.9 | 284.67 |
| 3020   | 9.59   |
| 3026.5 | 11.64  |
| 3085.9 | 0.73   |
| 3091.3 | 3.16   |
| 3125.3 | 6.79   |
| 3158.4 | 0.99   |

| Atom | Standard Orientation |             |             |
|------|----------------------|-------------|-------------|
| C    | 0.00000000           | 0.00000000  | 0.00000000  |
| C    | -0.13629500          | -1.48547600 | 0.00703200  |
| O    | -1.24649400          | -2.04732300 | 0.01638900  |
| Cu   | -3.06647600          | -1.50319300 | 0.00189500  |
| C    | 1.09038300           | -2.33134400 | 0.00432700  |
| H    | 1.84234500           | -1.92384300 | 0.68490800  |
| H    | 0.85682600           | -3.36528300 | 0.25023500  |
| H    | 1.52541800           | -2.29025600 | -1.00260300 |
| H    | 0.34441100           | 0.31811500  | 0.99161200  |
| H    | 0.76611500           | 0.31712600  | -0.71185200 |
| H    | -0.94923600          | 0.49033200  | -0.22257400 |

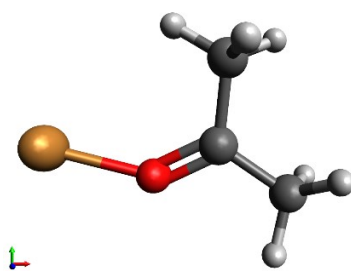


---

| Molecule                               | Multiplicity | E (no zpe)   | E (w/ zpe)   |
|----------------------------------------|--------------|--------------|--------------|
| Cu <sup>+</sup> (Ace)(N <sub>2</sub> ) | 1            | -1943.090828 | -1942.998146 |

| Frequency | Intensity |
|-----------|-----------|
| 48.7      | 0.6       |
| 50.4      | 0.64      |
| 98.7      | 2.26      |
| 108.2     | 0.56      |
| 122       | 2.53      |

|        |        |
|--------|--------|
| 154.5  | 5.85   |
| 256.4  | 4.26   |
| 273.3  | 0.55   |
| 275.8  | 1.62   |
| 373.7  | 2.17   |
| 443.4  | 3.2    |
| 497.2  | 0.42   |
| 593.6  | 20.44  |
| 829.2  | 0.59   |
| 886.6  | 1.74   |
| 931.6  | 5.46   |
| 1096.1 | 1.55   |
| 1111.7 | 10.99  |
| 1286.3 | 36.31  |
| 1390.8 | 51.1   |
| 1400.9 | 83.88  |
| 1439   | 40.72  |
| 1449.8 | 5.79   |
| 1468.3 | 40.93  |
| 1478.8 | 30.23  |
| 1676.3 | 375.69 |
| 2427.7 | 13.67  |
| 3020.6 | 10.02  |
| 3027.1 | 11.06  |
| 3086   | 0.28   |
| 3091.7 | 2.44   |
| 3130.9 | 6.64   |
| 3157.8 | 0.84   |

| Atom | Standard Orientation |             |             |
|------|----------------------|-------------|-------------|
| C    | 0.00000000           | 0.00000000  | 0.00000000  |
| C    | 0.06809100           | -1.49029200 | -0.00586600 |
| O    | 1.15394800           | -2.09733800 | -0.01715700 |
| Cu   | 2.98538900           | -1.70885100 | -0.00739500 |
| N    | 4.85029500           | -1.44495900 | 0.00045800  |
| N    | 5.93683300           | -1.29356600 | 0.00499900  |
| C    | -1.19456200          | -2.27960900 | 0.00115100  |
| H    | -1.93242000          | -1.83738400 | -0.67302000 |
| H    | -1.00870100          | -3.32230800 | -0.24869300 |
| H    | -1.62193000          | -2.22280800 | 1.01066000  |
| H    | -0.33258800          | 0.33166700  | -0.99125200 |
| H    | -0.75005500          | 0.35149300  | 0.71285900  |
| H    | 0.97085900           | 0.44634800  | 0.21857100  |

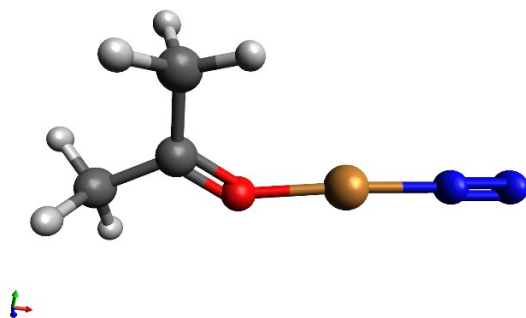


---

| Molecule                                | Multiplicity | E (no zpe)   | E (w/ zpe)   |
|-----------------------------------------|--------------|--------------|--------------|
| $\text{Cu}^+(\text{Ace})(\text{N}_2)_2$ | 1            | -2052.658306 | -2052.559437 |

| Frequency | Intensity |
|-----------|-----------|
| 11.6      | 0.69      |
| 22.2      | 0.79      |
| 39.1      | 0.19      |
| 45        | 0.36      |
| 92.1      | 2.56      |
| 92.6      | 1.54      |
| 100.2     | 2.75      |
| 133.3     | 2.05      |
| 177.8     | 0.02      |
| 184.6     | 0.1       |
| 205.9     | 0.42      |
| 217.2     | 0.85      |
| 229.8     | 3.87      |
| 247.9     | 1.85      |
| 280.1     | 1.33      |
| 422       | 5.14      |
| 496.1     | 0.54      |
| 571.7     | 21.35     |
| 822.9     | 0.46      |
| 887       | 1.24      |
| 925.8     | 4.99      |
| 1094      | 1.03      |
| 1113.7    | 8.48      |
| 1279      | 38.17     |
| 1393.2    | 43.3      |
| 1402      | 77.28     |
| 1444.4    | 29.6      |
| 1453.1    | 5.61      |
| 1468.6    | 41.61     |
| 1478.9    | 27.34     |

|        |        |
|--------|--------|
| 1698.5 | 350.89 |
| 2422.5 | 12.18  |
| 2430.2 | 4.11   |
| 3023.6 | 4.86   |
| 3029.9 | 7.03   |
| 3085.9 | 0.14   |
| 3092.4 | 1.84   |
| 3128.1 | 8.82   |
| 3155.6 | 1.13   |

| Atom | Standard Orientation |             |             |
|------|----------------------|-------------|-------------|
| C    | 0.00000000           | 0.00000000  | 0.00000000  |
| C    | -0.12728800          | 0.13845900  | 1.48408600  |
| O    | -1.23402200          | 0.19775100  | 2.03525700  |
| Cu   | -3.13113100          | 0.13700300  | 1.60221200  |
| N    | -4.21641400          | -1.53127700 | 1.49265400  |
| N    | -4.80539800          | -2.45503800 | 1.44212900  |
| N    | -4.17776500          | 1.84685300  | 1.42368100  |
| N    | -4.73640900          | 2.78629200  | 1.33669800  |
| C    | 1.11197400           | 0.20838700  | 2.31350400  |
| H    | 1.84336900           | 0.88182900  | 1.85882000  |
| H    | 0.88403700           | 0.51393700  | 3.33279200  |
| H    | 1.57276600           | -0.78688800 | 2.32880000  |
| H    | 0.36050100           | 0.95099700  | -0.40930600 |
| H    | 0.74808700           | -0.75368900 | -0.25825500 |
| H    | -0.95852100          | -0.24593000 | -0.45898300 |

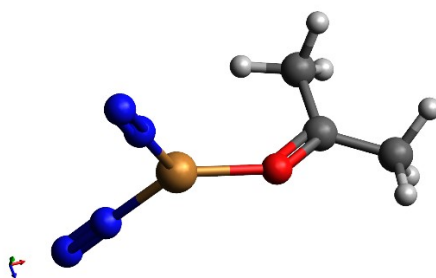


---

|                                    |              |              |              |
|------------------------------------|--------------|--------------|--------------|
| Molecule                           | Multiplicity | E (no zpe)   | E (w/ zpe)   |
| Cu <sup>+</sup> (Ace) <sub>2</sub> | 1            | -2026.792808 | -2026.622632 |

| Frequency | Intensity |
|-----------|-----------|
| 9         | 4.13      |
| 38.6      | 3.77      |
| 39.9      | 2.69      |
| 90.2      | 0.07      |

|        |        |
|--------|--------|
| 93.5   | 0.39   |
| 102.4  | 0.32   |
| 103.2  | 0.83   |
| 110.7  | 0.74   |
| 136    | 0.15   |
| 170.8  | 3.18   |
| 199.9  | 10.28  |
| 232.4  | 0      |
| 334.9  | 1.01   |
| 422.7  | 0      |
| 443.8  | 11.02  |
| 495.6  | 0.18   |
| 496.7  | 0.69   |
| 589.3  | 0      |
| 610.2  | 36.04  |
| 824.1  | 0.01   |
| 827    | 1.73   |
| 889.4  | 2.97   |
| 889.5  | 0      |
| 931    | 1.03   |
| 931.2  | 8.82   |
| 1095.4 | 0.03   |
| 1096.2 | 1.09   |
| 1112.8 | 2.74   |
| 1113   | 14.73  |
| 1283.1 | 0.35   |
| 1283.2 | 73.46  |
| 1393.3 | 89.12  |
| 1393.5 | 0.02   |
| 1402.5 | 144.2  |
| 1402.5 | 10.53  |
| 1443.8 | 72.45  |
| 1443.8 | 0.11   |
| 1453.1 | 11.3   |
| 1453.2 | 0.9    |
| 1469.5 | 64.26  |
| 1469.7 | 2.12   |
| 1480.5 | 16.1   |
| 1480.8 | 41.49  |
| 1685.6 | 687.75 |
| 1693.5 | 0.02   |
| 3023.1 | 1.04   |
| 3023.1 | 10.13  |
| 3029.4 | 11.15  |
| 3029.4 | 0      |

|        |       |
|--------|-------|
| 3086.4 | 0.28  |
| 3086.4 | 0.02  |
| 3092.5 | 0.23  |
| 3092.5 | 2.44  |
| 3131.5 | 11.41 |
| 3131.6 | 0.1   |
| 3155.9 | 0.02  |
| 3155.9 | 2.45  |

| Atom | Standard Orientation |             |             |
|------|----------------------|-------------|-------------|
| C    | 0.00000000           | 0.00000000  | 0.00000000  |
| C    | -1.27597500          | -0.77670400 | -0.05199500 |
| O    | -1.29015200          | -2.01672100 | -0.06766800 |
| Cu   | 0.00000000           | -3.38441300 | -0.06371500 |
| O    | 1.29015200           | -4.75210500 | -0.06766800 |
| C    | 1.27597500           | -5.99212200 | -0.05199500 |
| C    | 0.00000000           | -6.76882600 | 0.00000000  |
| H    | 0.03293200           | -7.61840600 | -0.68627300 |
| H    | -0.10825900          | -7.18360300 | 1.00936100  |
| H    | -0.86113500          | -6.13618500 | -0.21815000 |
| C    | 2.57247100           | -6.73035800 | -0.08203200 |
| H    | 2.56534300           | -7.55282000 | 0.63800100  |
| H    | 2.68498900           | -7.18499100 | -1.07395400 |
| H    | 3.40913200           | -6.05922800 | 0.10175100  |
| C    | -2.57247100          | -0.03846800 | -0.08203200 |
| H    | -2.56534300          | 0.78399400  | 0.63800100  |
| H    | -2.68498900          | 0.41616500  | -1.07395400 |
| H    | -3.40913200          | -0.70959800 | 0.10175100  |
| H    | -0.03293200          | 0.84958000  | -0.68627300 |
| H    | 0.10825900           | 0.41477700  | 1.00936100  |
| H    | 0.86113500           | -0.63264100 | -0.21815000 |

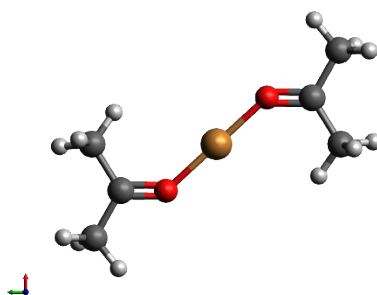


---

| Molecule                           | Multiplicity | E (no zpe)   | E (w/ zpe)   |
|------------------------------------|--------------|--------------|--------------|
| Cu <sup>+</sup> (Ace) <sub>3</sub> | 1            | -2220.044301 | -2219.789693 |



| Frequency | Intensity |
|-----------|-----------|
| 14.9      | 0.07      |
| 16.6      | 0.06      |
| 25.6      | 6.92      |
| 31.9      | 2.23      |
| 36        | 0.97      |
| 39        | 0.79      |
| 81.4      | 0.09      |
| 81.9      | 0.13      |
| 100.3     | 0.82      |
| 103.7     | 0.51      |
| 104.9     | 0.77      |
| 110.7     | 3.32      |
| 123.3     | 0.96      |
| 125.2     | 2.57      |
| 137.8     | 7.35      |
| 141.7     | 4.33      |
| 143.7     | 0.61      |
| 166.1     | 7.88      |
| 198.8     | 0.01      |
| 218.9     | 8.95      |
| 221       | 8.78      |
| 415.4     | 0.03      |
| 418.7     | 11.16     |
| 419       | 10.98     |
| 495.3     | 0.36      |
| 495.7     | 0.32      |
| 495.9     | 0.8       |
| 577.8     | 0.62      |
| 579.8     | 26.22     |
| 580       | 26.3      |
| 813.9     | 0.28      |
| 814.3     | 0.55      |
| 814.5     | 0.68      |
| 888.8     | 1.36      |
| 889.1     | 1.25      |
| 889.3     | 0.48      |
| 927.7     | 6.68      |
| 927.7     | 3.52      |
| 928.5     | 5.72      |
| 1094.9    | 1.48      |
| 1095      | 1.52      |
| 1096      | 0.01      |
| 1116.8    | 0.79      |
| 1117      | 2.68      |

|        |        |
|--------|--------|
| 1117.4 | 15.08  |
| 1275.1 | 73.57  |
| 1275.2 | 75.19  |
| 1275.5 | 3.17   |
| 1395.3 | 63.99  |
| 1395.5 | 66.03  |
| 1395.6 | 0.36   |
| 1403.1 | 6.71   |
| 1403.3 | 87.41  |
| 1403.4 | 99.33  |
| 1452   | 49.37  |
| 1453   | 47.69  |
| 1453.4 | 3.32   |
| 1458.9 | 2.45   |
| 1459   | 3.71   |
| 1459.4 | 1.42   |
| 1472.6 | 2.64   |
| 1473.2 | 39.21  |
| 1473.5 | 38.2   |
| 1488.3 | 10.91  |
| 1488.8 | 5.67   |
| 1489.8 | 42.3   |
| 1700.9 | 505.97 |
| 1701   | 507.46 |
| 1710.8 | 0.09   |
| 3024.4 | 2.97   |
| 3024.6 | 3.87   |
| 3024.7 | 5.5    |
| 3031   | 0.06   |
| 3031.1 | 0.07   |
| 3031.2 | 0.09   |
| 3085.5 | 1.62   |
| 3085.7 | 2.14   |
| 3085.7 | 0.45   |
| 3091.5 | 0.68   |
| 3091.6 | 0.28   |
| 3091.6 | 1.54   |
| 3140.2 | 0.36   |
| 3140.3 | 0.19   |
| 3140.3 | 0.12   |
| 3150.6 | 0.4    |
| 3150.6 | 5.14   |
| 3150.6 | 4.86   |

Atom

Standard Orientation

|    |             |             |             |
|----|-------------|-------------|-------------|
| C  | 0.00000000  | 0.00000000  | 0.00000000  |
| C  | 0.25885300  | -1.43060500 | 0.36732200  |
| O  | -0.65810400 | -2.24826000 | 0.48401200  |
| Cu | -2.66987200 | -2.08339400 | 0.33137900  |
| O  | -3.52944400 | -0.25009000 | 0.24971800  |
| C  | -4.69831800 | 0.13073600  | 0.35695900  |
| C  | -5.81740200 | -0.82544200 | 0.64347000  |
| H  | -6.12172600 | -0.69330900 | 1.68849100  |
| H  | -6.69216300 | -0.59480700 | 0.03061000  |
| H  | -5.50278700 | -1.85815700 | 0.49233000  |
| C  | -5.02527800 | 1.58495700  | 0.20624600  |
| H  | -5.56784100 | 1.72523600  | -0.73582800 |
| H  | -5.69611900 | 1.91404100  | 1.00448600  |
| H  | -4.11960900 | 2.18854000  | 0.19309500  |
| O  | -3.83426400 | -3.73994800 | 0.28536700  |
| C  | -3.57140100 | -4.94530200 | 0.25540300  |
| C  | -4.68228600 | -5.95045700 | 0.26707700  |
| H  | -4.51106900 | -6.72393300 | -0.48642800 |
| H  | -4.68523000 | -6.45630700 | 1.23956400  |
| H  | -5.64527400 | -5.46815800 | 0.10963400  |
| C  | -2.15872500 | -5.44546100 | 0.20261200  |
| H  | -1.96697600 | -5.82722700 | -0.80704600 |
| H  | -1.44846700 | -4.64864600 | 0.42353400  |
| H  | -2.01993800 | -6.28625300 | 0.88680500  |
| C  | 1.67575700  | -1.86355600 | 0.58950700  |
| H  | 2.32319300  | -1.48885200 | -0.20795300 |
| H  | 2.03620200  | -1.41411000 | 1.52202500  |
| H  | 1.74492900  | -2.94733200 | 0.66272500  |
| H  | 0.60605500  | 0.67305600  | 0.61147200  |
| H  | 0.31540000  | 0.15009500  | -1.03923400 |
| H  | -1.05812000 | 0.24608500  | 0.08999100  |

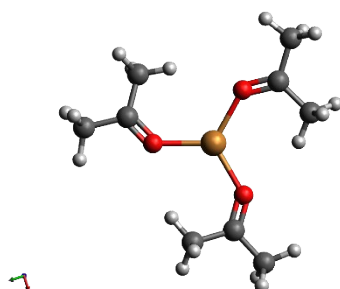


---

| Molecule                           | Multiplicity | E (no zpe)   | E (w/ zpe)   |
|------------------------------------|--------------|--------------|--------------|
| Cu <sup>+</sup> (Ace) <sub>4</sub> | 1            | -2413.293002 | -2412.954072 |

| Frequency | Intensity |
|-----------|-----------|
| 14.8      | 0.14      |
| 15.9      | 0.76      |
| 16.6      | 0.62      |
| 23.3      | 1.59      |
| 27.2      | 0.48      |
| 29.4      | 0.61      |
| 42.9      | 1.84      |
| 50.3      | 1.63      |
| 53.5      | 2.15      |
| 69.6      | 0.13      |
| 89.9      | 0.71      |
| 90.7      | 3.19      |
| 94.4      | 1.33      |
| 94.7      | 0.74      |
| 104.6     | 10.63     |
| 107.3     | 1.97      |
| 107.6     | 4.25      |
| 121.5     | 2.53      |
| 125.4     | 0.06      |
| 127       | 2.2       |
| 130.1     | 7.4       |
| 135       | 3.98      |
| 141       | 5.67      |
| 146.2     | 5.14      |
| 160.6     | 2.3       |
| 170.1     | 1.08      |
| 171.6     | 1.16      |
| 176.5     | 8.85      |
| 178.2     | 0.91      |
| 405.2     | 3.01      |
| 409.2     | 5.27      |
| 410.5     | 6.29      |
| 414.5     | 8.56      |
| 492.6     | 1.12      |
| 494       | 0.27      |
| 495.6     | 1.01      |
| 506.6     | 0.4       |
| 560.7     | 15.69     |
| 568       | 9.26      |
| 568.3     | 16.54     |
| 569.7     | 18.78     |
| 802.9     | 0.66      |
| 808.2     | 0.56      |

|        |       |
|--------|-------|
| 808.8  | 1.31  |
| 811.2  | 1.08  |
| 888.7  | 0.14  |
| 889    | 0.57  |
| 889.8  | 1.24  |
| 890.2  | 0.8   |
| 921.9  | 5.03  |
| 922.5  | 4.53  |
| 923.9  | 5.6   |
| 951.1  | 6.94  |
| 1083.4 | 4.75  |
| 1092.9 | 0     |
| 1093.7 | 0.58  |
| 1094.5 | 0.18  |
| 1115.3 | 3.25  |
| 1116.1 | 4.29  |
| 1117.2 | 4.84  |
| 1117.8 | 8.86  |
| 1259.7 | 72.46 |
| 1266.1 | 30.02 |
| 1268.2 | 66.47 |
| 1271.1 | 53.78 |
| 1392.7 | 75.33 |
| 1393.9 | 23.51 |
| 1394.8 | 37.7  |
| 1395.6 | 40.77 |
| 1396.1 | 16.08 |
| 1401   | 34.94 |
| 1402.6 | 88.5  |
| 1403.2 | 58.99 |
| 1455.2 | 13.48 |
| 1456.9 | 31.26 |
| 1457.5 | 46.71 |
| 1459   | 27.72 |
| 1459.6 | 0.24  |
| 1460.6 | 4.79  |
| 1462.1 | 2.98  |
| 1465.7 | 4.7   |
| 1472.7 | 34.32 |
| 1473.1 | 25.5  |
| 1474.4 | 17.74 |
| 1476.8 | 17.5  |
| 1486.6 | 10.79 |
| 1487.6 | 0.93  |

|        |        |
|--------|--------|
| 1490.5 | 19.19  |
| 1491.5 | 33.41  |
| 1710.3 | 380.62 |
| 1714.2 | 354.31 |
| 1717.5 | 285.37 |
| 1729   | 137.02 |
| 3023.8 | 4.7    |
| 3024.5 | 0.95   |
| 3024.9 | 2.52   |
| 3025.5 | 1.06   |
| 3030.7 | 0.81   |
| 3031   | 0.16   |
| 3031.2 | 0.99   |
| 3034.1 | 5.27   |
| 3079.4 | 1.13   |
| 3083   | 2.43   |
| 3084   | 1.01   |
| 3084.1 | 1.76   |
| 3089   | 2.05   |
| 3090   | 1.83   |
| 3090.2 | 2.99   |
| 3095.4 | 0.64   |
| 3138.7 | 1.49   |
| 3139.1 | 6.79   |
| 3141.2 | 0.65   |
| 3145.8 | 4.64   |
| 3147.3 | 3.84   |
| 3147.6 | 6.45   |
| 3147.7 | 4.9    |
| 3148.8 | 2.94   |

| Atom | Standard Orientation |             |             |
|------|----------------------|-------------|-------------|
| Cu   | 0.00000000           | 0.00000000  | 0.00000000  |
| O    | -1.92063900          | -0.71405800 | 0.40846300  |
| C    | -2.35701700          | -1.82235300 | 0.72128800  |
| C    | -3.82447400          | -2.00782000 | 0.97933800  |
| H    | -4.20153700          | -2.88339500 | 0.44336400  |
| H    | -3.97441800          | -2.20747300 | 2.04631900  |
| H    | -4.38459700          | -1.11813100 | 0.69632300  |
| C    | -1.45911700          | -3.01758500 | 0.84935200  |
| H    | -1.64178400          | -3.67853500 | -0.00621500 |
| H    | -0.41024900          | -2.72377900 | 0.85417200  |
| H    | -1.70557600          | -3.59255800 | 1.74575400  |
| O    | 1.53050400           | -1.42636000 | 0.35804800  |

|   |             |             |             |
|---|-------------|-------------|-------------|
| C | 2.73440400  | -1.22970300 | 0.20214400  |
| C | 3.22588100  | 0.10087200  | -0.30112300 |
| H | 2.90699500  | 0.87104100  | 0.40793600  |
| H | 4.30664300  | 0.13684300  | -0.43153400 |
| H | 2.72159600  | 0.32028400  | -1.24670900 |
| C | 3.73148000  | -2.30444600 | 0.51208200  |
| H | 4.31201000  | -2.53284500 | -0.38822900 |
| H | 4.44675700  | -1.93629800 | 1.25528600  |
| H | 3.23844100  | -3.20329800 | 0.87808700  |
| O | 0.56628200  | 1.56917000  | 1.27809300  |
| C | -0.07105200 | 2.40297700  | 1.91642200  |
| C | -1.57153800 | 2.47133700  | 1.84386200  |
| H | -2.00402700 | 2.59536700  | 2.84001500  |
| H | -1.85260200 | 3.35980500  | 1.26691200  |
| H | -1.97654600 | 1.58279600  | 1.35996300  |
| C | 0.63882400  | 3.39364700  | 2.79398300  |
| H | 0.26178900  | 4.40504000  | 2.61813500  |
| H | 0.42387400  | 3.15678800  | 3.84204800  |
| H | 1.71425400  | 3.35494000  | 2.62941100  |
| O | 0.25803500  | 0.54456600  | -2.00413500 |
| C | -0.51449900 | 0.97504200  | -2.85686700 |
| C | -0.02750900 | 1.26264700  | -4.24781700 |
| H | -0.46939900 | 0.53397000  | -4.93663700 |
| H | -0.36431800 | 2.24936700  | -4.57806200 |
| H | 1.05777100  | 1.19471500  | -4.29903200 |
| C | -1.96284000 | 1.23519400  | -2.54647800 |
| H | -2.60660400 | 0.86053400  | -3.34637000 |
| H | -2.23992300 | 0.78750700  | -1.59205600 |
| H | -2.11984700 | 2.31879400  | -2.49818500 |

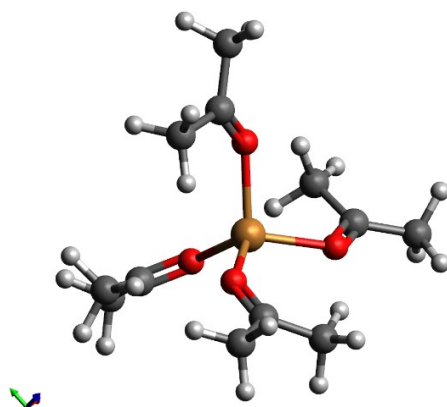


---

| Molecule | Multiplicity | E (no zpe) | E (w/ zpe) |
|----------|--------------|------------|------------|
|----------|--------------|------------|------------|

Cu<sup>+</sup>(Pin)(Ace)<sub>2</sub>

1

-2413.191971

-2412.845947

| Frequency | Intensity |
|-----------|-----------|
| 24.6      | 2.1       |
| 36        | 3.01      |
| 41        | 2.67      |
| 44.5      | 0.81      |
| 48.9      | 1.13      |
| 56.4      | 2.43      |
| 62.7      | 3.21      |
| 82        | 0.68      |
| 136.3     | 1.36      |
| 139.3     | 1.61      |
| 150.3     | 1.2       |
| 154       | 1.18      |
| 169.7     | 0.62      |
| 198.1     | 0.26      |
| 208.9     | 0.09      |
| 214.3     | 0.06      |
| 220       | 2.23      |
| 226.3     | 5.93      |
| 233.4     | 1.81      |
| 237.2     | 5.28      |
| 272.7     | 2.5       |
| 294.7     | 2.54      |
| 307.9     | 0.25      |
| 323.2     | 0.63      |
| 353.2     | 2.93      |
| 354.8     | 2.94      |
| 378.9     | 0.02      |
| 395       | 10.19     |
| 420.2     | 5.04      |
| 428.2     | 28.93     |
| 447.8     | 1.01      |
| 496.1     | 5.54      |
| 502.6     | 2.84      |
| 508.7     | 0.48      |
| 514.1     | 0.57      |
| 549.4     | 5.35      |
| 600.1     | 12.77     |
| 606.8     | 11.98     |
| 625.9     | 20.12     |
| 685.6     | 36.05     |
| 712       | 18.64     |
| 806.4     | 7.99      |



|        |        |
|--------|--------|
| 818.8  | 1.09   |
| 820.4  | 3.24   |
| 864.7  | 26.96  |
| 883.8  | 0.99   |
| 889    | 5.41   |
| 918.7  | 2.48   |
| 941.7  | 1.01   |
| 944.3  | 0.49   |
| 960.1  | 5.02   |
| 961.3  | 15.88  |
| 965.2  | 5.87   |
| 1010.5 | 3.65   |
| 1018.3 | 8.33   |
| 1083.5 | 4.69   |
| 1093   | 2.7    |
| 1113.3 | 9.26   |
| 1113.7 | 7.73   |
| 1133   | 13.94  |
| 1155.7 | 101.59 |
| 1185.9 | 19.67  |
| 1210.4 | 2.7    |
| 1253   | 17.46  |
| 1272.2 | 37     |
| 1278   | 35.67  |
| 1308.7 | 1.86   |
| 1385.9 | 50.48  |
| 1386   | 29.71  |
| 1387.6 | 42.56  |
| 1389.5 | 53.56  |
| 1397.1 | 10.85  |
| 1399   | 0.19   |
| 1412.5 | 23.95  |
| 1421.9 | 6.06   |
| 1450.7 | 63.46  |
| 1454.8 | 42.2   |
| 1456.2 | 4.08   |
| 1456.8 | 10.22  |
| 1463.8 | 19.1   |
| 1465.9 | 11.5   |
| 1470.4 | 8.65   |
| 1471.2 | 0.59   |
| 1484.6 | 21.27  |
| 1487.9 | 11.88  |
| 1489.9 | 5.85   |
| 1500.6 | 14.22  |

|        |        |
|--------|--------|
| 1504.6 | 10.05  |
| 1506.9 | 10.82  |
| 1517.3 | 2.68   |
| 1527.3 | 0.28   |
| 1671.8 | 602.23 |
| 1683.4 | 184.68 |
| 3023   | 8.99   |
| 3026.6 | 8.52   |
| 3027.7 | 2.15   |
| 3033.3 | 3.17   |
| 3035   | 4.31   |
| 3037.1 | 4.09   |
| 3039.5 | 18.43  |
| 3041.3 | 0.53   |
| 3080.4 | 0.16   |
| 3083.3 | 0.47   |
| 3097.1 | 8.56   |
| 3100.7 | 6.83   |
| 3101.4 | 2.39   |
| 3103.9 | 13.49  |
| 3110.3 | 1.24   |
| 3111.8 | 38.12  |
| 3114.8 | 0.91   |
| 3115.9 | 30.37  |
| 3137.6 | 0.77   |
| 3138.4 | 20.09  |
| 3152   | 1.32   |
| 3152.2 | 3.51   |
| 3157.2 | 3.36   |
| 3158.1 | 3.34   |

| Atom | Standard Orientation |             |             |
|------|----------------------|-------------|-------------|
| C    | 0.00000000           | 0.00000000  | 0.00000000  |
| C    | -0.78128300          | -0.54492300 | 1.15140900  |
| O    | -0.61776600          | -1.70662600 | 1.55207300  |
| Cu   | 0.71905900           | -3.00780500 | 1.01784400  |
| O    | -0.73859400          | -4.17619700 | 0.49195300  |
| C    | -1.03373200          | -5.32516100 | 0.85195800  |
| C    | -0.32085900          | -6.00909100 | 1.97290600  |
| H    | -0.73937000          | -5.62429700 | 2.91151700  |
| H    | -0.47091600          | -7.08777100 | 1.95399700  |
| H    | 0.73938500           | -5.75724200 | 1.93989100  |
| C    | -2.15194500          | -6.02442200 | 0.15526800  |
| H    | -1.73426000          | -6.88471500 | -0.38124200 |
| H    | -2.85282600          | -6.42901900 | 0.89181900  |

|   |             |             |             |
|---|-------------|-------------|-------------|
| H | -2.66091000 | -5.36440800 | -0.54400500 |
| O | 2.06275100  | -1.88883700 | 1.39871000  |
| C | 3.34158500  | -2.34745500 | 0.87731300  |
| C | 4.39879600  | -1.58645100 | 1.67690800  |
| H | 5.39472600  | -1.94226900 | 1.39592100  |
| H | 4.34572700  | -0.51976700 | 1.45032000  |
| H | 4.26177400  | -1.71862600 | 2.74892900  |
| C | 3.43007000  | -1.99077700 | -0.60886800 |
| H | 4.42003500  | -2.20842300 | -1.01350400 |
| H | 2.69006700  | -2.54736200 | -1.18743500 |
| H | 3.24469200  | -0.92203200 | -0.73232100 |
| C | 3.28500600  | -3.87278900 | 1.12659800  |
| O | 1.96507800  | -4.23161200 | 0.62878700  |
| C | 4.26584400  | -4.71239500 | 0.30870200  |
| H | 5.29115400  | -4.43695400 | 0.57388200  |
| H | 4.13181400  | -5.77198100 | 0.53474800  |
| H | 4.12234700  | -4.56724200 | -0.76079900 |
| C | 3.37186500  | -4.23608200 | 2.61116500  |
| H | 2.68464000  | -3.62706900 | 3.20181400  |
| H | 3.11125100  | -5.28876300 | 2.73787700  |
| H | 4.38190500  | -4.09256800 | 2.99900700  |
| C | -1.77420300 | 0.32000800  | 1.84969300  |
| H | -1.27142000 | 1.23162600  | 2.19113500  |
| H | -2.53716100 | 0.63928100  | 1.13132000  |
| H | -2.23421900 | -0.19764000 | 2.68864300  |
| H | -0.35005300 | 0.98072700  | -0.31571800 |
| H | 1.04704200  | 0.04955200  | 0.31461500  |
| H | -0.04319000 | -0.70382200 | -0.83584900 |

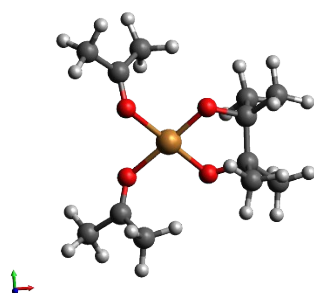


---

|                                     |              |              |              |
|-------------------------------------|--------------|--------------|--------------|
| Molecule                            | Multiplicity | E (no zpe)   | E (w/ zpe)   |
| Co <sup>2+</sup> (Ace) <sub>3</sub> | 4            | -1961.940501 | -1961.686144 |
| Frequency                           | Intensity    |              |              |
| 26.2                                | 0.4          |              |              |

|        |       |
|--------|-------|
| 27.2   | 1.13  |
| 27.9   | 3.16  |
| 33.2   | 1.29  |
| 33.6   | 1.23  |
| 40.1   | 1.33  |
| 81.6   | 1.14  |
| 95.1   | 0.39  |
| 95.9   | 0.16  |
| 100.8  | 1.73  |
| 114.4  | 1.58  |
| 115.7  | 2.8   |
| 119.3  | 3.61  |
| 122.4  | 3.28  |
| 123.6  | 6.5   |
| 142.6  | 0.72  |
| 142.7  | 0.23  |
| 186.5  | 24.44 |
| 240.3  | 0     |
| 313.9  | 18.39 |
| 314    | 18.37 |
| 435.5  | 0.24  |
| 452.1  | 26.95 |
| 452.1  | 26.84 |
| 500.3  | 0.7   |
| 500.4  | 1.16  |
| 501.2  | 1.08  |
| 564.3  | 0.29  |
| 569.9  | 57.88 |
| 570.1  | 57.71 |
| 833.6  | 0.07  |
| 835    | 2.3   |
| 835.5  | 2.27  |
| 881    | 7.47  |
| 882.2  | 0.01  |
| 882.7  | 7.53  |
| 931.7  | 3.29  |
| 932.4  | 5.7   |
| 932.8  | 5.27  |
| 1097.4 | 0.25  |
| 1098   | 8.16  |
| 1098.1 | 7.64  |
| 1106.6 | 3.69  |
| 1106.9 | 6.42  |
| 1107.6 | 32.23 |
| 1295.4 | 55    |

|        |        |
|--------|--------|
| 1295.5 | 55.98  |
| 1295.9 | 2.23   |
| 1381.9 | 140.37 |
| 1382   | 137.69 |
| 1383.2 | 2.58   |
| 1392.2 | 19.58  |
| 1392.6 | 107.72 |
| 1392.7 | 127.98 |
| 1428.8 | 73.54  |
| 1430.4 | 76.25  |
| 1430.9 | 5.04   |
| 1446.5 | 8.4    |
| 1447.1 | 1.71   |
| 1447.4 | 14.47  |
| 1464.5 | 113.89 |
| 1464.8 | 95.74  |
| 1465   | 2.76   |
| 1475.7 | 7.81   |
| 1476.3 | 17.78  |
| 1477   | 67.46  |
| 1622.6 | 693.61 |
| 1622.8 | 694.31 |
| 1646.7 | 4.29   |
| 3012.3 | 25.92  |
| 3012.4 | 24.27  |
| 3012.6 | 28.87  |
| 3021.4 | 34.67  |
| 3021.6 | 22.85  |
| 3022   | 13.55  |
| 3078.9 | 1.9    |
| 3079.1 | 1.54   |
| 3079.2 | 1.47   |
| 3085.6 | 7.19   |
| 3085.7 | 5.95   |
| 3085.8 | 9.02   |
| 3137.7 | 5.33   |
| 3137.8 | 3.4    |
| 3138.4 | 4.16   |
| 3158.6 | 2      |
| 3159   | 2.13   |
| 3159.2 | 2.08   |

| Atom | Standard Orientation |            |             |
|------|----------------------|------------|-------------|
| C    | 0.00000000           | 0.00000000 | 0.00000000  |
| C    | 1.42071700           | 0.36476200 | -0.24122600 |

|    |             |             |             |
|----|-------------|-------------|-------------|
| O  | 1.76651800  | 1.56527200  | -0.35807000 |
| Co | 1.12828500  | 3.36234900  | -0.43878100 |
| O  | -0.74725800 | 3.70502900  | -0.34437000 |
| C  | -1.61633600 | 4.60449400  | -0.24401400 |
| C  | -1.22578200 | 6.03383000  | -0.12631200 |
| H  | -1.51753500 | 6.54428000  | -1.05340800 |
| H  | -1.79213200 | 6.51821300  | 0.67455700  |
| H  | -0.15415100 | 6.15454200  | 0.03176900  |
| C  | -3.04882100 | 4.22049600  | -0.24081400 |
| H  | -3.42010300 | 4.32362100  | 0.78858100  |
| H  | -3.63628600 | 4.91738100  | -0.84485600 |
| H  | -3.19463700 | 3.19425800  | -0.57198600 |
| O  | 2.36570500  | 4.81155900  | -0.32836800 |
| C  | 3.57930000  | 5.10870800  | -0.21297800 |
| C  | 3.97918100  | 6.53469800  | -0.28699300 |
| H  | 4.73399500  | 6.76336200  | 0.47050900  |
| H  | 4.46700400  | 6.69415500  | -1.25900300 |
| H  | 3.12344800  | 7.20171100  | -0.20478400 |
| C  | 4.60679800  | 4.05439100  | -0.00696300 |
| H  | 4.97701400  | 4.13713700  | 1.02333900  |
| H  | 4.20509500  | 3.05389700  | -0.16780900 |
| H  | 5.47122500  | 4.23277900  | -0.65291800 |
| C  | 2.45379400  | -0.69341400 | -0.35024300 |
| H  | 2.29265000  | -1.46945600 | 0.40307000  |
| H  | 2.32526100  | -1.18515300 | -1.32490200 |
| H  | 3.46094200  | -0.28627100 | -0.28797700 |
| H  | -0.29521500 | -0.83115600 | -0.64687800 |
| H  | -0.08540900 | -0.37294600 | 1.02908000  |
| H  | -0.66967200 | 0.84960200  | -0.13384200 |

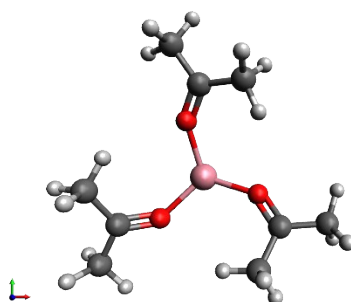


---

|                                     |              |              |              |
|-------------------------------------|--------------|--------------|--------------|
| Molecule                            | Multiplicity | E (no zpe)   | E (w/ zpe)   |
| Co <sup>2+</sup> (Ace) <sub>4</sub> | 4            | -2155.206576 | -2154.866887 |
| Frequency                           | Intensity    |              |              |

|       |       |
|-------|-------|
| 10.7  | 0.17  |
| 20.8  | 0.56  |
| 24.4  | 1.01  |
| 28.9  | 0.88  |
| 32.7  | 0.57  |
| 34.4  | 0.88  |
| 41.4  | 2.54  |
| 45.8  | 1.74  |
| 48.7  | 2.12  |
| 87.8  | 0.59  |
| 93.3  | 1.6   |
| 97.9  | 0.86  |
| 102.9 | 1.2   |
| 107.9 | 0.56  |
| 109.4 | 1.72  |
| 115.4 | 0.58  |
| 119.3 | 1.38  |
| 123.3 | 0.39  |
| 126.9 | 1.6   |
| 129.2 | 2.44  |
| 133.9 | 2.13  |
| 141.6 | 1.84  |
| 160.2 | 3.48  |
| 177.1 | 8.12  |
| 186.8 | 18.67 |
| 224.6 | 0.01  |
| 273.4 | 30.56 |
| 284.2 | 25.67 |
| 288.5 | 26.28 |
| 420.2 | 1.76  |
| 424.1 | 17.93 |
| 426.7 | 23.55 |
| 428.8 | 19.31 |
| 501.3 | 0.91  |
| 502.4 | 1.58  |
| 503.2 | 0.22  |
| 503.9 | 1.46  |
| 557.7 | 18.23 |
| 563.3 | 3.56  |
| 568.1 | 52.53 |
| 571.1 | 36.66 |
| 823.2 | 0.65  |
| 824.7 | 0.69  |
| 824.9 | 1.5   |

|        |        |
|--------|--------|
| 825.8  | 1.7    |
| 881.8  | 3.01   |
| 882.5  | 3.96   |
| 883.1  | 3.3    |
| 883.3  | 1.09   |
| 924.1  | 4.08   |
| 926.1  | 3.51   |
| 926.8  | 4.88   |
| 928.6  | 4.39   |
| 1092.7 | 4.83   |
| 1094.1 | 4.98   |
| 1094.3 | 1.77   |
| 1094.8 | 4.67   |
| 1110.9 | 2      |
| 1112.1 | 3.38   |
| 1112.5 | 18.41  |
| 1113.3 | 19.82  |
| 1283.3 | 22.12  |
| 1285.4 | 56.85  |
| 1287.5 | 52.97  |
| 1287.9 | 29.59  |
| 1389.3 | 103    |
| 1389.4 | 94.97  |
| 1390   | 94.12  |
| 1391   | 3.03   |
| 1397.8 | 19.74  |
| 1398.3 | 87.79  |
| 1398.4 | 52.88  |
| 1398.5 | 143.99 |
| 1437.9 | 49.57  |
| 1439.2 | 83.37  |
| 1440.8 | 43.07  |
| 1440.9 | 37.05  |
| 1449.6 | 5.51   |
| 1450   | 3.14   |
| 1450.8 | 3.65   |
| 1451.6 | 5.22   |
| 1466.4 | 56.51  |
| 1466.6 | 76.22  |
| 1468.6 | 25.58  |
| 1468.9 | 41.87  |
| 1479.2 | 25.28  |
| 1480.8 | 26.58  |
| 1482   | 14.76  |



|        |        |
|--------|--------|
| 1482.8 | 40.35  |
| 1648.7 | 623    |
| 1652.2 | 619.33 |
| 1656.5 | 593.65 |
| 1684.6 | 37.26  |
| 3020.9 | 14.39  |
| 3021.2 | 8.32   |
| 3021.3 | 19.3   |
| 3022.6 | 12.22  |
| 3028   | 14.08  |
| 3028.3 | 14.38  |
| 3028.5 | 11.73  |
| 3029.7 | 12.1   |
| 3082   | 0.44   |
| 3083.5 | 0.38   |
| 3084.1 | 0.18   |
| 3084.8 | 0.39   |
| 3089.8 | 2.17   |
| 3090.3 | 2.6    |
| 3090.7 | 2.59   |
| 3091.1 | 2.44   |
| 3142.1 | 4.14   |
| 3143.8 | 5.18   |
| 3147.3 | 2.03   |
| 3148.3 | 1.91   |
| 3157   | 1.61   |
| 3157.3 | 2.04   |
| 3158.3 | 1.56   |
| 3158.5 | 1.74   |

| Atom | Standard Orientation |             |             |
|------|----------------------|-------------|-------------|
| Co   | 0.00000000           | 0.00000000  | 0.00000000  |
| O    | -1.66862900          | -1.01151500 | -0.32182900 |
| C    | -2.11416700          | -2.09629600 | -0.74923000 |
| C    | -3.58549100          | -2.32781500 | -0.74557400 |
| H    | -3.90831400          | -2.76243400 | -1.69601300 |
| H    | -3.81557000          | -3.07877400 | 0.02137400  |
| H    | -4.13765900          | -1.41523700 | -0.53045800 |
| C    | -1.21267900          | -3.16567900 | -1.26723900 |
| H    | -1.31183900          | -3.19547400 | -2.36011500 |
| H    | -0.17048200          | -2.98682400 | -1.00679500 |
| H    | -1.53511800          | -4.14691700 | -0.90944100 |
| O    | 1.60105500           | -1.12902300 | -0.28186500 |
| C    | 2.81102900           | -1.04599600 | -0.57537000 |

|   |             |             |             |
|---|-------------|-------------|-------------|
| C | 3.44373400  | 0.25380500  | -0.94206300 |
| H | 4.07735800  | 0.57229900  | -0.10427000 |
| H | 4.11450800  | 0.12665400  | -1.79577900 |
| H | 2.70562600  | 1.02778500  | -1.14769500 |
| C | 3.64560700  | -2.27951100 | -0.55829500 |
| H | 3.85659500  | -2.56571800 | -1.59715900 |
| H | 4.61694700  | -2.08280100 | -0.09656000 |
| H | 3.13816700  | -3.10149400 | -0.05723400 |
| O | 0.22492400  | 0.67995200  | 1.83948900  |
| C | -0.18636100 | 0.67058500  | 3.01443900  |
| C | -1.37275500 | -0.13780700 | 3.42460000  |
| H | -1.01790700 | -0.99483300 | 4.01092800  |
| H | -2.01943700 | 0.43782200  | 4.09180800  |
| H | -1.93842500 | -0.49995700 | 2.56699800  |
| C | 0.52450400  | 1.48528300  | 4.03961000  |
| H | -0.11525600 | 2.33541900  | 4.30961400  |
| H | 0.66578800  | 0.91007100  | 4.95897200  |
| H | 1.47557600  | 1.85847700  | 3.66540300  |
| O | 0.04926100  | 1.61908000  | -1.15237300 |
| C | -0.67573200 | 2.51175000  | -1.63265000 |
| C | -0.05936400 | 3.56947400  | -2.48145700 |
| H | -0.32932400 | 3.36942500  | -3.52688700 |
| H | -0.47590300 | 4.55163600  | -2.24306000 |
| H | 1.02491800  | 3.57596800  | -2.39057700 |
| C | -2.14653800 | 2.55295400  | -1.38113200 |
| H | -2.68770300 | 2.78377800  | -2.30254400 |
| H | -2.51737200 | 1.62568900  | -0.94571800 |
| H | -2.35310700 | 3.38338500  | -0.69412300 |

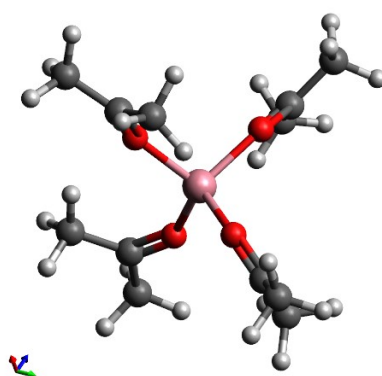


---

| Molecule                            | Multiplicity | E (no zpe)  | E (w/ zpe)   |
|-------------------------------------|--------------|-------------|--------------|
| Ni <sup>2+</sup> (Ace) <sub>3</sub> | 3            | -2087.46374 | -2087.208946 |

| Frequency | Intensity |
|-----------|-----------|
| 21.4      | 0.14      |
| 24.1      | 0.11      |
| 32        | 2.58      |
| 44.8      | 4.54      |
| 47.2      | 0.85      |
| 47.5      | 0.76      |
| 88.3      | 0.87      |
| 101.4     | 1.82      |
| 106.9     | 3.07      |
| 110.9     | 3.43      |
| 119.8     | 2.06      |
| 124       | 1.76      |
| 130.3     | 1.01      |
| 136.1     | 1.58      |
| 137       | 0.74      |
| 154.3     | 5.66      |
| 155.2     | 5.73      |
| 200.7     | 15.06     |
| 259       | 5.42      |
| 315.6     | 15.62     |
| 316.1     | 14.64     |
| 435.1     | 3.01      |
| 449.3     | 19.76     |
| 449.5     | 19.72     |
| 499       | 1.3       |
| 499.3     | 0.82      |
| 503.3     | 0.54      |
| 577.2     | 1.53      |
| 588.1     | 50.68     |
| 588.5     | 49.52     |
| 830.5     | 0.41      |
| 831.7     | 2.14      |
| 836       | 1.96      |
| 880.3     | 4.64      |
| 884       | 6.26      |
| 884       | 2.54      |
| 930.4     | 4.42      |
| 935.8     | 4.92      |
| 935.9     | 5.34      |
| 1096      | 4.07      |
| 1096.1    | 1.82      |
| 1097.3    | 2.72      |
| 1105.4    | 4.38      |
| 1106.2    | 18.33     |

|        |        |
|--------|--------|
| 1108.5 | 18.42  |
| 1295.2 | 50.85  |
| 1295.6 | 49.33  |
| 1296.4 | 13.42  |
| 1378.5 | 136.11 |
| 1378.8 | 114.25 |
| 1380   | 32.1   |
| 1389.7 | 57.6   |
| 1390.4 | 99.94  |
| 1390.6 | 72.17  |
| 1429   | 63.5   |
| 1429.2 | 59.26  |
| 1430.1 | 23.65  |
| 1446.1 | 12.09  |
| 1446.3 | 7.54   |
| 1447.7 | 4.9    |
| 1464   | 20.44  |
| 1464.4 | 74.44  |
| 1464.7 | 95.29  |
| 1476   | 26.81  |
| 1478.8 | 38.18  |
| 1479.3 | 28.09  |
| 1612.6 | 589.41 |
| 1613.3 | 587.97 |
| 1633.3 | 48.1   |
| 3010.8 | 37.57  |
| 3011   | 30.44  |
| 3012.9 | 27.95  |
| 3021   | 23.32  |
| 3021.2 | 18.85  |
| 3023.5 | 23.62  |
| 3078   | 1.33   |
| 3078.7 | 2.31   |
| 3078.8 | 2.33   |
| 3085.3 | 8.27   |
| 3086.4 | 4.51   |
| 3086.5 | 10.04  |
| 3146   | 4.11   |
| 3146.4 | 3.35   |
| 3148.3 | 3.84   |
| 3158.7 | 2.3    |
| 3159.1 | 2.49   |
| 3159.3 | 2.5    |

Atom

Standard Orientation

|    |             |             |             |
|----|-------------|-------------|-------------|
| C  | 0.00000000  | 0.00000000  | 0.00000000  |
| C  | 0.12132100  | -1.35276700 | -0.60298300 |
| O  | 1.23052500  | -1.79466900 | -0.99168000 |
| Ni | 3.00288700  | -1.21717100 | -1.33773100 |
| O  | 3.37437300  | 0.60524000  | -0.95917700 |
| C  | 4.32253800  | 1.34669600  | -0.60186800 |
| C  | 5.62212400  | 0.77868900  | -0.15840300 |
| H  | 6.37922800  | 1.03524900  | -0.91080000 |
| H  | 5.94696400  | 1.25748900  | 0.77004500  |
| H  | 5.57906700  | -0.30338000 | -0.04221800 |
| C  | 4.11955600  | 2.81604100  | -0.62563400 |
| H  | 4.03703300  | 3.16072300  | 0.41468700  |
| H  | 4.99963700  | 3.31663800  | -1.03956700 |
| H  | 3.21900300  | 3.09233500  | -1.17037500 |
| O  | 4.38532100  | -2.45972300 | -0.96354100 |
| C  | 4.54940200  | -3.64053500 | -0.56941500 |
| C  | 5.89645900  | -4.24797000 | -0.69265100 |
| H  | 6.14433900  | -4.82096800 | 0.20537300  |
| H  | 5.85675200  | -4.97586800 | -1.51565800 |
| H  | 6.65966700  | -3.50450300 | -0.91356100 |
| C  | 3.42710000  | -4.42130700 | 0.01312900  |
| H  | 3.59805200  | -4.49893400 | 1.09511700  |
| H  | 2.46219900  | -3.94889300 | -0.16803100 |
| H  | 3.43622600  | -5.44579100 | -0.36880200 |
| C  | -1.07666900 | -2.21346200 | -0.75364100 |
| H  | -1.70666400 | -2.15635400 | 0.13858600  |
| H  | -1.67820000 | -1.80144800 | -1.57653900 |
| H  | -0.81213200 | -3.24241300 | -0.98889300 |
| H  | -0.88802500 | 0.51025100  | -0.38283700 |
| H  | -0.16394500 | -0.12697700 | 1.07842900  |
| H  | 0.89338500  | 0.60215000  | -0.16201600 |

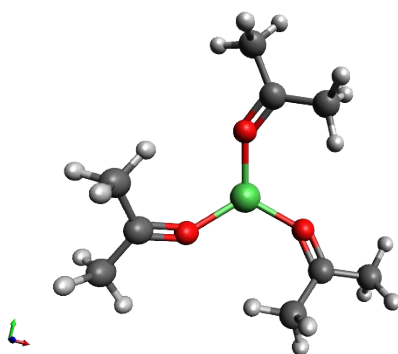


---

Molecule

Multiplicity

E (no zpe)

E (w/ zpe)

Ni<sup>2+</sup>(Ace)<sub>4</sub>                      3                      -2280.762336                      -2280.421795

| Frequency | Intensity |
|-----------|-----------|
| 17.6      | 0.98      |
| 21        | 0.63      |
| 26.8      | 1.24      |
| 29.6      | 0.05      |
| 35        | 2.33      |
| 35.7      | 0.85      |
| 42.4      | 2.61      |
| 54.4      | 2.24      |
| 63.8      | 1.84      |
| 92        | 2.75      |
| 96.7      | 0.91      |
| 98.4      | 0.39      |
| 104.1     | 1         |
| 110.1     | 1.5       |
| 115.9     | 1.64      |
| 123.7     | 0.5       |
| 127.1     | 1.41      |
| 133.5     | 0.53      |
| 137.1     | 0.19      |
| 142.2     | 0.53      |
| 147.1     | 0.44      |
| 166.3     | 3.06      |
| 174.2     | 5.43      |
| 182.6     | 4.09      |
| 198       | 12.84     |
| 229       | 1.72      |
| 267.9     | 9.9       |
| 291.5     | 17.86     |
| 312       | 40.08     |
| 425.5     | 0         |
| 428       | 6.53      |
| 434.2     | 31.62     |
| 435.7     | 15.9      |
| 498.5     | 0.69      |
| 501.2     | 1         |
| 502       | 0.48      |
| 503.1     | 2.72      |
| 578.8     | 26.45     |
| 579.8     | 15.69     |
| 593       | 40.96     |
| 598.8     | 24.09     |
| 823.1     | 0.41      |

|        |        |
|--------|--------|
| 825.7  | 0.67   |
| 826.5  | 2.67   |
| 828.6  | 1.4    |
| 883    | 3.48   |
| 884.6  | 3.59   |
| 885.5  | 3.14   |
| 886.3  | 2.06   |
| 930.3  | 3.78   |
| 932.2  | 4.25   |
| 933.6  | 4.34   |
| 936.3  | 4.67   |
| 1094.1 | 2.39   |
| 1095.4 | 2.78   |
| 1096.4 | 4.33   |
| 1099.2 | 1.26   |
| 1109.9 | 2.52   |
| 1111.4 | 2.99   |
| 1112.5 | 22.44  |
| 1114   | 14.35  |
| 1287.8 | 24.06  |
| 1289.2 | 53.36  |
| 1290.6 | 36.09  |
| 1291.5 | 32.94  |
| 1387.1 | 74.33  |
| 1388.1 | 86.72  |
| 1388.7 | 111.75 |
| 1389.9 | 20.92  |
| 1397.2 | 58.99  |
| 1397.9 | 45.33  |
| 1398.6 | 113.53 |
| 1399.1 | 65.5   |
| 1434.8 | 53.74  |
| 1437.8 | 59.44  |
| 1438.7 | 35.31  |
| 1443.3 | 32.72  |
| 1448.8 | 5.48   |
| 1449.9 | 10.07  |
| 1449.9 | 4.87   |
| 1453.4 | 5.59   |
| 1465.4 | 53.15  |
| 1466.8 | 31.71  |
| 1467.3 | 36.06  |
| 1469   | 50.67  |
| 1484   | 24.76  |
| 1484.7 | 18.6   |

|        |        |
|--------|--------|
| 1489.9 | 26.1   |
| 1492.7 | 36.57  |
| 1650.6 | 551.23 |
| 1655   | 510.04 |
| 1657.7 | 502.19 |
| 1681   | 57.53  |
| 3019   | 11.88  |
| 3019.4 | 14.71  |
| 3020.3 | 13.26  |
| 3021.7 | 16.65  |
| 3025.7 | 18.22  |
| 3026.6 | 15.28  |
| 3026.8 | 9.37   |
| 3029   | 8.67   |
| 3080.6 | 0.39   |
| 3080.8 | 0.97   |
| 3080.8 | 0.67   |
| 3082.6 | 0.83   |
| 3089.6 | 1.58   |
| 3089.9 | 3.66   |
| 3092.5 | 2.1    |
| 3094.1 | 3.06   |
| 3138   | 3.14   |
| 3141.8 | 4.42   |
| 3146.3 | 2.92   |
| 3155.5 | 1.89   |
| 3156.3 | 1.68   |
| 3157.6 | 2.1    |
| 3157.9 | 2.28   |
| 3158.2 | 1.5    |

| Atom | Standard Orientation |             |             |
|------|----------------------|-------------|-------------|
| Ni   | 0.00000000           | 0.00000000  | 0.00000000  |
| O    | -1.62199100          | -0.18059400 | 1.06192400  |
| C    | -2.83183800          | -0.44684300 | 0.93741100  |
| C    | -3.69702900          | -0.49189600 | 2.14564700  |
| H    | -4.36181900          | 0.38161300  | 2.12344300  |
| H    | -4.34971800          | -1.36927400 | 2.11617300  |
| H    | -3.10782200          | -0.47355900 | 3.06026100  |
| C    | -3.42211900          | -0.72525700 | -0.40508500 |
| H    | -4.40514200          | -0.25889900 | -0.50345100 |
| H    | -2.75869400          | -0.39771000 | -1.20522200 |
| H    | -3.58572300          | -1.80727800 | -0.48367900 |
| O    | -0.59747500          | 1.27394300  | -1.39176500 |
| C    | -0.51580700          | 2.51206100  | -1.50994000 |



|   |             |             |             |
|---|-------------|-------------|-------------|
| C | 0.08116400  | 3.37003500  | -0.44486400 |
| H | 0.67007800  | 4.17978300  | -0.88129600 |
| H | -0.74140500 | 3.84725700  | 0.10316100  |
| H | 0.69200900  | 2.79366000  | 0.24898500  |
| C | -1.04585800 | 3.15535500  | -2.74370300 |
| H | -1.62875100 | 4.04597300  | -2.49198800 |
| H | -0.19270200 | 3.50849400  | -3.33729400 |
| H | -1.63559200 | 2.46053000  | -3.33840000 |
| O | 1.89351900  | 0.56073300  | 0.08685800  |
| C | 2.94048100  | 0.06750000  | 0.55349800  |
| C | 4.20154000  | 0.85420800  | 0.49157900  |
| H | 4.72468900  | 0.81481200  | 1.45153500  |
| H | 4.86937300  | 0.37651400  | -0.23695500 |
| H | 4.01753400  | 1.88360600  | 0.19103700  |
| C | 2.95633800  | -1.28518100 | 1.18360100  |
| H | 3.85229900  | -1.84037400 | 0.89593600  |
| H | 3.01715000  | -1.14960300 | 2.27116300  |
| H | 2.06009900  | -1.85781600 | 0.94365800  |
| O | 0.15385200  | -1.77602400 | -0.81129900 |
| C | 0.14889200  | -2.32572300 | -1.92866400 |
| C | 0.33645100  | -3.80126500 | -2.00663400 |
| H | -0.60879400 | -4.25319600 | -2.33271900 |
| H | 1.07113600  | -4.05090100 | -2.77794500 |
| H | 0.62424700  | -4.22101000 | -1.04480800 |
| C | -0.03457200 | -1.54369300 | -3.18503100 |
| H | -0.72521100 | -2.05710400 | -3.85897400 |
| H | -0.36836900 | -0.52774800 | -2.98277500 |
| H | 0.93004000  | -1.51119500 | -3.70707300 |

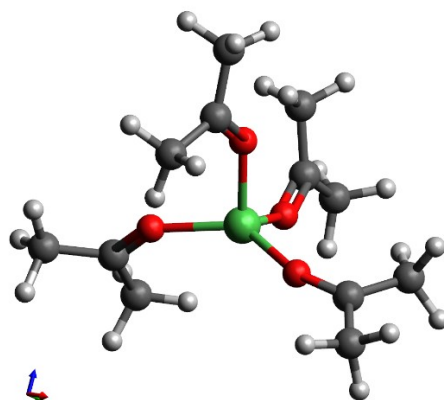


---

| Molecule                       | Multiplicity | E (no zpe)   | E (w/ zpe)  |
|--------------------------------|--------------|--------------|-------------|
| $\text{Cu}^{2+}(\text{Ace})_3$ | 2            | -2219.637784 | -2219.38312 |

| Frequency | Intensity |
|-----------|-----------|
| 13.4      | 1.67      |
| 26        | 0.39      |
| 34.4      | 2.31      |
| 42.2      | 1.63      |
| 44.5      | 5.16      |
| 55        | 1.12      |
| 92.1      | 0.24      |
| 99.6      | 1.15      |
| 102.6     | 2.49      |
| 114.5     | 1.92      |
| 118.1     | 0.93      |
| 127.1     | 1.33      |
| 131.8     | 0.28      |
| 136.5     | 0.43      |
| 145.4     | 0.23      |
| 173.5     | 1.01      |
| 192.7     | 9.32      |
| 203.4     | 7.19      |
| 242.3     | 0.59      |
| 277.8     | 5.73      |
| 332.5     | 15.6      |
| 429.1     | 1.62      |
| 434.2     | 3.87      |
| 455.4     | 23.96     |
| 496.5     | 0.38      |
| 501.6     | 0.58      |
| 503.3     | 0.99      |
| 575.2     | 31.58     |
| 595.6     | 14.68     |
| 610.2     | 28.91     |
| 823.3     | 0.59      |
| 830.1     | 0.72      |
| 832.5     | 5.3       |
| 879.9     | 1.5       |
| 884.3     | 4.78      |
| 884.5     | 7.22      |
| 929.8     | 4.6       |
| 935.7     | 5.39      |
| 936       | 4.88      |
| 1089.2    | 1.96      |
| 1091.6    | 1         |
| 1095.6    | 0.71      |
| 1102.6    | 3.19      |
| 1103.7    | 19.12     |

|        |        |
|--------|--------|
| 1105.4 | 19     |
| 1285.5 | 29.41  |
| 1287   | 43.71  |
| 1294.3 | 21.87  |
| 1372   | 63.6   |
| 1372.8 | 36.08  |
| 1379.2 | 59.13  |
| 1381.6 | 76.67  |
| 1387.6 | 69.97  |
| 1390.8 | 86.55  |
| 1427   | 22.06  |
| 1428   | 55.19  |
| 1430.6 | 28.35  |
| 1444   | 14.21  |
| 1444.1 | 4.75   |
| 1444.5 | 23.95  |
| 1462.3 | 54.24  |
| 1464.1 | 48.11  |
| 1467.7 | 64.24  |
| 1473.6 | 34.74  |
| 1476.2 | 31.24  |
| 1488   | 32.2   |
| 1610.9 | 359.05 |
| 1614.8 | 654.33 |
| 1625.2 | 41.07  |
| 3010.5 | 37.75  |
| 3012.5 | 24.99  |
| 3014.2 | 26.98  |
| 3020.4 | 30.29  |
| 3021.7 | 34.26  |
| 3022.2 | 26.36  |
| 3078.2 | 4.01   |
| 3079.4 | 3.43   |
| 3079.4 | 1.83   |
| 3085.4 | 9.2    |
| 3087.2 | 8.15   |
| 3090.1 | 5.86   |
| 3119   | 7.21   |
| 3150.5 | 2.44   |
| 3152   | 4.74   |
| 3159.6 | 3.2    |
| 3159.9 | 3.92   |
| 3160   | 3.66   |

Atom

Standard Orientation

|    |             |             |             |
|----|-------------|-------------|-------------|
| C  | 0.00000000  | 0.00000000  | 0.00000000  |
| C  | 0.82958000  | 0.06310800  | -1.23422700 |
| O  | 1.33939100  | 1.12930600  | -1.64629600 |
| Cu | 1.24891000  | 2.97030400  | -1.04642900 |
| O  | -0.59912300 | 3.24534500  | -0.71155600 |
| C  | -1.50613400 | 3.87877800  | -1.30299700 |
| C  | -1.29885600 | 4.47537900  | -2.65036600 |
| H  | -1.92059200 | 3.93046600  | -3.37157000 |
| H  | -1.65462500 | 5.51003400  | -2.66512500 |
| H  | -0.25678900 | 4.43325400  | -2.97319200 |
| C  | -2.81550600 | 4.03233500  | -0.62098000 |
| H  | -2.88952500 | 5.07322700  | -0.27567700 |
| H  | -3.63865600 | 3.88712000  | -1.32620500 |
| H  | -2.90460400 | 3.36862600  | 0.23665700  |
| O  | 2.97384400  | 3.66154800  | -0.93604500 |
| C  | 4.20276200  | 3.48615300  | -1.09879000 |
| C  | 5.11990500  | 4.63369900  | -0.89154700 |
| H  | 6.01672500  | 4.31082600  | -0.35507900 |
| H  | 5.45925600  | 4.96730000  | -1.88265500 |
| H  | 4.62843000  | 5.46066300  | -0.38287300 |
| C  | 4.73279900  | 2.15345300  | -1.49046800 |
| H  | 5.22887300  | 1.72176700  | -0.61084700 |
| H  | 3.94159900  | 1.48652400  | -1.82943400 |
| H  | 5.50748600  | 2.26395900  | -2.25414200 |
| C  | 1.09129400  | -1.17896000 | -2.01096500 |
| H  | 1.34173500  | -2.00185400 | -1.33481200 |
| H  | 0.15375800  | -1.46412400 | -2.50750600 |
| H  | 1.86527900  | -1.03403500 | -2.76175100 |
| H  | -0.85229300 | -0.66869200 | -0.14303500 |
| H  | 0.61573500  | -0.45600000 | 0.78714800  |
| H  | -0.33352300 | 0.98347900  | 0.32852300  |

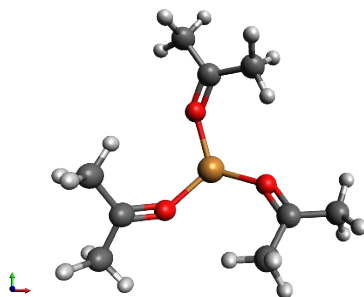


---

| Molecule                       | Multiplicity | E (no zpe)   | E (w/ zpe)   |
|--------------------------------|--------------|--------------|--------------|
| $\text{Cu}^{2+}(\text{Ace})_4$ | 2            | -2412.929454 | -2412.588807 |

| Frequency | Intensity |
|-----------|-----------|
| 9.4       | 0.15      |
| 30.7      | 0         |
| 32        | 6.57      |
| 40.4      | 1.76      |
| 45.3      | 0         |
| 46.7      | 0.78      |
| 50.5      | 2.91      |
| 52.2      | 0         |
| 64.5      | 5.16      |
| 78.1      | 0         |
| 78.8      | 0.13      |
| 95.7      | 0         |
| 105.6     | 0         |
| 109.4     | 1.36      |
| 112.9     | 0         |
| 119.6     | 1.62      |
| 121.1     | 0         |
| 128.4     | 1.36      |
| 129       | 0         |
| 141.4     | 0.17      |
| 151       | 0         |
| 181.1     | 0         |
| 198.3     | 2.08      |
| 221.8     | 6.47      |
| 226.3     | 12.64     |
| 233.6     | 0         |
| 237.2     | 0         |
| 308.8     | 31.92     |
| 311       | 29.87     |
| 421.4     | 0         |
| 424.6     | 0         |
| 429.7     | 17.05     |
| 435       | 25.54     |
| 500.2     | 0         |
| 501.3     | 1.66      |
| 503.1     | 0         |
| 503.9     | 2.58      |
| 581.6     | 0         |
| 588.9     | 0         |
| 597.9     | 19.05     |
| 601.8     | 47.3      |
| 823.3     | 0         |
| 825.4     | 1.78      |

|        |        |
|--------|--------|
| 826.8  | 0      |
| 828.6  | 2.13   |
| 883.8  | 0      |
| 884.2  | 5.96   |
| 884.7  | 0      |
| 885.2  | 7.74   |
| 925.9  | 0      |
| 926    | 6.31   |
| 931.2  | 0      |
| 931.3  | 8.56   |
| 1092.7 | 0      |
| 1094.9 | 1.58   |
| 1095.3 | 0      |
| 1095.4 | 1.31   |
| 1108.4 | 0      |
| 1110.3 | 28.09  |
| 1110.9 | 12.07  |
| 1112.1 | 0      |
| 1285.3 | 23.91  |
| 1286.3 | 0      |
| 1286.6 | 85.48  |
| 1287.4 | 0      |
| 1386.2 | 0      |
| 1387.2 | 117    |
| 1387.9 | 108.4  |
| 1389.5 | 0      |
| 1396.5 | 17.76  |
| 1397.1 | 0      |
| 1397.8 | 0      |
| 1398   | 273.16 |
| 1437.3 | 71.5   |
| 1437.4 | 0      |
| 1438.9 | 0      |
| 1439   | 34.66  |
| 1448.7 | 0      |
| 1449   | 12.3   |
| 1450.7 | 0      |
| 1450.8 | 30.84  |
| 1469.1 | 96.87  |
| 1469.3 | 0      |
| 1470.3 | 96.94  |
| 1470.7 | 0      |
| 1478.1 | 0      |
| 1478.3 | 48.45  |
| 1486.3 | 0      |

|        |        |
|--------|--------|
| 1486.6 | 77.73  |
| 1649.1 | 0      |
| 1655   | 682.44 |
| 1664.8 | 817.67 |
| 1681.1 | 0      |
| 3020.4 | 0      |
| 3020.4 | 28.72  |
| 3022.3 | 0      |
| 3022.3 | 23.94  |
| 3028   | 24.39  |
| 3028.1 | 0      |
| 3031.2 | 35.87  |
| 3031.3 | 0      |
| 3082.7 | 0      |
| 3082.7 | 0.72   |
| 3083.7 | 0      |
| 3083.7 | 0.72   |
| 3090.7 | 0      |
| 3090.7 | 4.59   |
| 3091.6 | 0      |
| 3091.6 | 8.18   |
| 3135   | 0      |
| 3135   | 19.36  |
| 3150.6 | 5.7    |
| 3150.6 | 0      |
| 3157.5 | 2.86   |
| 3157.5 | 0      |
| 3158.1 | 3.38   |
| 3158.1 | 0      |

| Atom | Standard Orientation |            |             |
|------|----------------------|------------|-------------|
| Cu   | 0.00000000           | 0.00000000 | 0.00000000  |
| O    | -1.75076800          | 0.62979700 | 0.62909200  |
| C    | -2.64251500          | 1.36887000 | 0.17278900  |
| C    | -3.78266100          | 1.74081100 | 1.05695600  |
| H    | -3.67505900          | 2.80096600 | 1.32085000  |
| H    | -4.73131700          | 1.65605500 | 0.51959900  |
| H    | -3.79232700          | 1.14496400 | 1.96747500  |
| C    | -2.61404500          | 1.87665600 | -1.23057100 |
| H    | -2.89142800          | 2.93340500 | -1.26206800 |
| H    | -1.64313900          | 1.72947300 | -1.70064600 |
| H    | -3.38720000          | 1.34576000 | -1.79997300 |
| O    | 0.53920800           | 1.85153600 | -0.39826200 |
| C    | 1.40213600           | 2.62169200 | 0.05737300  |
| C    | 2.21371800           | 2.27717700 | 1.26253000  |

|   |             |             |             |
|---|-------------|-------------|-------------|
| H | 3.27488200  | 2.46103700  | 1.07329000  |
| H | 1.92756500  | 2.95003900  | 2.07923900  |
| H | 2.05627600  | 1.24628500  | 1.57948500  |
| C | 1.62721100  | 3.93165900  | -0.61591600 |
| H | 1.69422900  | 4.73786800  | 0.11977400  |
| H | 2.60169900  | 3.89206200  | -1.11941900 |
| H | 0.85403700  | 4.13874100  | -1.35293900 |
| O | 1.75076800  | -0.62979700 | -0.62909200 |
| C | 2.64251500  | -1.36887000 | -0.17278900 |
| C | 3.78266100  | -1.74081100 | -1.05695600 |
| H | 4.73131700  | -1.65605500 | -0.51959900 |
| H | 3.67505900  | -2.80096600 | -1.32085000 |
| H | 3.79232700  | -1.14496400 | -1.96747500 |
| C | 2.61404500  | -1.87665600 | 1.23057100  |
| H | 2.89142800  | -2.93340500 | 1.26206800  |
| H | 3.38720000  | -1.34576000 | 1.79997300  |
| H | 1.64313900  | -1.72947300 | 1.70064600  |
| O | -0.53920800 | -1.85153600 | 0.39826200  |
| C | -1.40213600 | -2.62169200 | -0.05737300 |
| C | -1.62721100 | -3.93165900 | 0.61591600  |
| H | -2.60169900 | -3.89206200 | 1.11941900  |
| H | -1.69422900 | -4.73786800 | -0.11977400 |
| H | -0.85403700 | -4.13874100 | 1.35293900  |
| C | -2.21371800 | -2.27717700 | -1.26253000 |
| H | -3.27488200 | -2.46103700 | -1.07329000 |
| H | -2.05627600 | -1.24628500 | -1.57948500 |
| H | -1.92756500 | -2.95003900 | -2.07923900 |

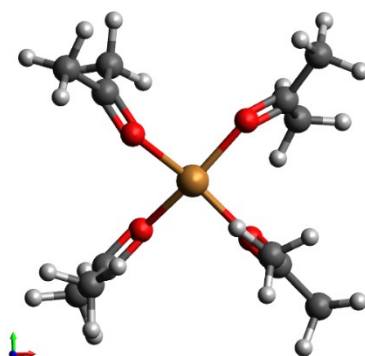


---

|                                     |              |              |              |
|-------------------------------------|--------------|--------------|--------------|
| Molecule                            | Multiplicity | E (no zpe)   | E (w/ zpe)   |
| Zn <sup>2+</sup> (Ace) <sub>3</sub> | 2            | -2358.518203 | -2358.263302 |
| Frequency                           | Intensity    |              |              |
| 17                                  | 0.01         |              |              |



|        |       |
|--------|-------|
| 17.3   | 0.01  |
| 27.2   | 3.88  |
| 43.8   | 4.85  |
| 49.9   | 0.99  |
| 50.6   | 0.95  |
| 99.6   | 0.11  |
| 100.4  | 0.23  |
| 107.3  | 3.66  |
| 125.2  | 0.06  |
| 130.6  | 0.25  |
| 135.1  | 1.92  |
| 138.9  | 1.66  |
| 143.8  | 3.53  |
| 146.3  | 2.41  |
| 150.3  | 7.58  |
| 150.9  | 7.22  |
| 198.5  | 25.34 |
| 248.3  | 0.01  |
| 308.6  | 20.38 |
| 308.7  | 20.09 |
| 434.7  | 0.01  |
| 447    | 27.56 |
| 447.2  | 28.05 |
| 502.3  | 0.18  |
| 502.6  | 1.15  |
| 502.9  | 0.77  |
| 586.1  | 0.03  |
| 598.2  | 48.26 |
| 598.4  | 48.31 |
| 829.9  | 0     |
| 831.7  | 1.5   |
| 831.9  | 1.6   |
| 880.5  | 7.33  |
| 880.7  | 8.16  |
| 880.9  | 0.78  |
| 937.8  | 1.99  |
| 938.1  | 5.83  |
| 938.2  | 9.77  |
| 1095.2 | 1.54  |
| 1095.2 | 17.47 |
| 1095.2 | 18.75 |
| 1107.4 | 2.65  |
| 1107.7 | 3.08  |
| 1108.5 | 37.98 |
| 1300.6 | 53.23 |

|        |        |
|--------|--------|
| 1300.7 | 54.33  |
| 1302.2 | 0.16   |
| 1380.8 | 159.23 |
| 1381   | 160.54 |
| 1382.3 | 0.82   |
| 1394.5 | 8.38   |
| 1394.7 | 124.75 |
| 1394.9 | 164.11 |
| 1425.2 | 98.59  |
| 1426.6 | 100.1  |
| 1427.6 | 4.33   |
| 1445.5 | 5.81   |
| 1445.8 | 1.65   |
| 1446.6 | 14.78  |
| 1467.7 | 68.19  |
| 1467.9 | 66.91  |
| 1468.1 | 37.73  |
| 1482   | 4.99   |
| 1482.8 | 35.81  |
| 1483.4 | 67.85  |
| 1609.4 | 656.55 |
| 1609.4 | 652.51 |
| 1632.3 | 0.01   |
| 3008.1 | 38.89  |
| 3008.1 | 43.74  |
| 3008.2 | 14.09  |
| 3017.9 | 29.66  |
| 3018   | 23.03  |
| 3018.3 | 11.13  |
| 3079   | 2.63   |
| 3079   | 3.51   |
| 3079.1 | 0.5    |
| 3085.2 | 4.44   |
| 3085.3 | 7.81   |
| 3085.4 | 8.68   |
| 3136.7 | 3.4    |
| 3136.7 | 3.63   |
| 3136.9 | 0.2    |
| 3159.1 | 1.67   |
| 3159.3 | 1.7    |
| 3159.3 | 1.7    |

| Atom | Standard Orientation |             |             |
|------|----------------------|-------------|-------------|
| C    | 0.00000000           | 0.00000000  | 0.00000000  |
| C    | -0.09256900          | -1.45540300 | -0.27907700 |

|    |             |             |             |
|----|-------------|-------------|-------------|
| O  | 0.93255500  | -2.18432900 | -0.34482200 |
| Zn | 2.83611500  | -1.91249000 | -0.25215800 |
| O  | 3.55032600  | -0.12492600 | -0.21914300 |
| C  | 4.69512900  | 0.39625200  | -0.28487800 |
| C  | 5.91623500  | -0.42300500 | -0.49057200 |
| H  | 6.27345700  | -0.24183900 | -1.51341900 |
| H  | 6.71981800  | -0.08584400 | 0.17026000  |
| H  | 5.73072700  | -1.48936600 | -0.35788700 |
| C  | 4.80517300  | 1.86766400  | -0.15173100 |
| H  | 5.18112100  | 2.07934500  | 0.86000200  |
| H  | 5.55329500  | 2.26764500  | -0.84119200 |
| H  | 3.84314700  | 2.35979200  | -0.28015400 |
| O  | 4.02783500  | -3.42429400 | -0.21900000 |
| C  | 3.90310600  | -4.67738600 | -0.19161300 |
| C  | 5.13100600  | -5.50566500 | -0.22596900 |
| H  | 5.03841900  | -6.36970400 | 0.43723800  |
| H  | 5.22505900  | -5.91283300 | -1.24338000 |
| H  | 6.02037200  | -4.92217200 | 0.00378400  |
| C  | 2.57061600  | -5.32930100 | -0.12776100 |
| H  | 2.45309600  | -5.75577100 | 0.87764500  |
| H  | 1.75487800  | -4.63182400 | -0.32062900 |
| H  | 2.52538400  | -6.17629300 | -0.81826900 |
| C  | -1.41679500 | -2.08609800 | -0.48752600 |
| H  | -2.15989200 | -1.67133000 | 0.19863100  |
| H  | -1.75386300 | -1.81617900 | -1.49911200 |
| H  | -1.36646200 | -3.17044700 | -0.41127900 |
| H  | -0.67173500 | 0.55993500  | -0.65675000 |
| H  | -0.36843800 | 0.16983500  | 1.02083000  |
| H  | 1.02016800  | 0.37662400  | -0.08121000 |

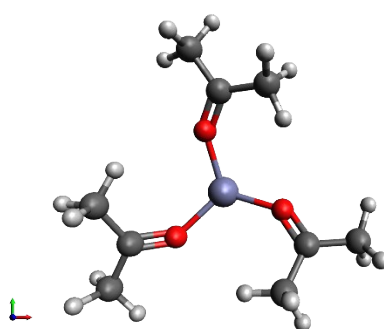


---

| Molecule                            | Multiplicity | E (no zpe)   | E (w/ zpe)   |
|-------------------------------------|--------------|--------------|--------------|
| Zn <sup>2+</sup> (Ace) <sub>4</sub> | 1            | -2551.778197 | -2551.438795 |
| Frequency                           | Intensity    |              |              |

|       |       |
|-------|-------|
| 10.9  | 0.59  |
| 14.5  | 0.7   |
| 20    | 0.29  |
| 23.8  | 1.3   |
| 30.8  | 0.06  |
| 33.7  | 1.85  |
| 38.5  | 1.58  |
| 43.8  | 1.65  |
| 45.9  | 1.7   |
| 86.3  | 0.18  |
| 94.3  | 0.78  |
| 94.9  | 0.84  |
| 103.9 | 2.95  |
| 108   | 1.51  |
| 111   | 2.13  |
| 117.9 | 3.03  |
| 118.6 | 1.26  |
| 123.2 | 0.68  |
| 123.7 | 0.3   |
| 127   | 2.24  |
| 127.9 | 0.74  |
| 148   | 10.01 |
| 153.8 | 5.59  |
| 167.3 | 6.7   |
| 182.4 | 33    |
| 226.6 | 0.05  |
| 266.5 | 32.27 |
| 268.4 | 25.62 |
| 268.7 | 25.63 |
| 419.3 | 0.63  |
| 420.9 | 17.15 |
| 421.9 | 18.28 |
| 423.5 | 19.61 |
| 501.2 | 1.26  |
| 501.6 | 0.97  |
| 502.2 | 0.3   |
| 502.8 | 1.73  |
| 561.4 | 14.56 |
| 565.1 | 11.72 |
| 567.8 | 49.46 |
| 570.9 | 35.22 |
| 822.5 | 0.47  |
| 823.1 | 1.02  |
| 823.2 | 1.19  |

|        |        |
|--------|--------|
| 823.8  | 1.37   |
| 880.9  | 4.29   |
| 881.3  | 3.74   |
| 881.6  | 2.71   |
| 881.8  | 0.83   |
| 925.6  | 4.85   |
| 927.8  | 4.67   |
| 929    | 4.49   |
| 929.3  | 5.6    |
| 1091.3 | 7.22   |
| 1091.9 | 6.32   |
| 1093.2 | 4.96   |
| 1093.3 | 6.37   |
| 1111.1 | 1.07   |
| 1111.7 | 12.08  |
| 1112.7 | 12.6   |
| 1113.3 | 21.15  |
| 1284.7 | 32.36  |
| 1285.6 | 25.71  |
| 1287   | 65.27  |
| 1287.7 | 40.32  |
| 1389   | 96.18  |
| 1389.1 | 104.26 |
| 1389.6 | 103.68 |
| 1390.5 | 0.43   |
| 1398.7 | 23.04  |
| 1399   | 124.61 |
| 1399.3 | 126.52 |
| 1399.3 | 39.86  |
| 1435.8 | 72.58  |
| 1436.9 | 74.4   |
| 1438.3 | 62.44  |
| 1439   | 32.96  |
| 1447.7 | 4.07   |
| 1448.7 | 0.69   |
| 1449.1 | 7.25   |
| 1449.6 | 2.59   |
| 1466.9 | 55.28  |
| 1467.8 | 60.3   |
| 1468   | 22.23  |
| 1469.5 | 26.61  |
| 1481   | 27.02  |
| 1482.6 | 48.08  |
| 1482.9 | 15.71  |

|        |        |
|--------|--------|
| 1484.5 | 25.75  |
| 1651.4 | 604.34 |
| 1654.4 | 594.56 |
| 1656.3 | 587.95 |
| 1685.2 | 12.8   |
| 3019.8 | 15.42  |
| 3020.4 | 12.7   |
| 3020.8 | 15.16  |
| 3021.2 | 12.34  |
| 3026.5 | 12.72  |
| 3027.5 | 16.49  |
| 3027.7 | 12.25  |
| 3028.2 | 12.37  |
| 3083.2 | 0.79   |
| 3083.2 | 0.21   |
| 3084   | 0.73   |
| 3085   | 0.53   |
| 3090.6 | 2.19   |
| 3091.1 | 2.37   |
| 3091.2 | 3.81   |
| 3091.5 | 2.48   |
| 3137.9 | 6.64   |
| 3143.5 | 4.23   |
| 3145.3 | 3.41   |
| 3146.9 | 1.75   |
| 3157.5 | 1.44   |
| 3157.6 | 1.39   |
| 3158.3 | 1.47   |
| 3159.1 | 1.51   |

| Atom | Standard Orientation |             |             |
|------|----------------------|-------------|-------------|
| Zn   | 0.00000000           | 0.00000000  | 0.00000000  |
| O    | 1.77475900           | -0.82984000 | -0.34079300 |
| C    | 2.31860200           | -1.95284100 | -0.38757600 |
| C    | 3.77109500           | -2.03772600 | -0.70397600 |
| H    | 4.26831900           | -2.75984800 | -0.05040700 |
| H    | 3.87721600           | -2.43207500 | -1.72336400 |
| H    | 4.25361800           | -1.06412500 | -0.64579000 |
| C    | 1.55913300           | -3.21043200 | -0.13163400 |
| H    | 1.82661500           | -3.57054600 | 0.87052300  |
| H    | 0.48178400           | -3.05837300 | -0.18267800 |
| H    | 1.86704100           | -3.99632000 | -0.82576900 |
| O    | -1.44813700          | -1.25825600 | -0.51738700 |
| C    | -2.68661600          | -1.36157600 | -0.40301200 |

|   |             |             |             |
|---|-------------|-------------|-------------|
| C | -3.50621700 | -0.32656900 | 0.29103300  |
| H | -4.04329800 | 0.25098800  | -0.47237400 |
| H | -4.27459100 | -0.79474200 | 0.91140200  |
| H | -2.89786800 | 0.35063400  | 0.88951300  |
| C | -3.36743700 | -2.55314100 | -0.98074200 |
| H | -3.65405700 | -3.21658400 | -0.15380200 |
| H | -4.29966500 | -2.26736100 | -1.47512400 |
| H | -2.71633900 | -3.09598600 | -1.66307600 |
| O | -0.21641400 | 1.69140800  | -1.01169800 |
| C | 0.16195500  | 2.28640600  | -2.04020300 |
| C | 1.13585900  | 1.67702000  | -2.99225700 |
| H | 0.58065800  | 1.34131000  | -3.87784500 |
| H | 1.85000500  | 2.42346300  | -3.34841400 |
| H | 1.65983300  | 0.82769800  | -2.55552900 |
| C | -0.37918300 | 3.64317200  | -2.32971000 |
| H | 0.41923200  | 4.37604000  | -2.15363300 |
| H | -0.64439600 | 3.73659400  | -3.38656000 |
| H | -1.22866000 | 3.88070000  | -1.69258500 |
| O | -0.22950900 | 0.42858000  | 1.92590800  |
| C | 0.31922400  | 1.06965700  | 2.84364000  |
| C | -0.30507700 | 1.07603800  | 4.19549900  |
| H | 0.30888600  | 0.45318200  | 4.85940500  |
| H | -0.28975700 | 2.08128400  | 4.62550700  |
| H | -1.31753900 | 0.67838000  | 4.17169400  |
| C | 1.58208500  | 1.83529600  | 2.62804400  |
| H | 2.26237100  | 1.70899100  | 3.47393600  |
| H | 2.08056700  | 1.56024700  | 1.69860400  |
| H | 1.33101300  | 2.90328300  | 2.59715800  |

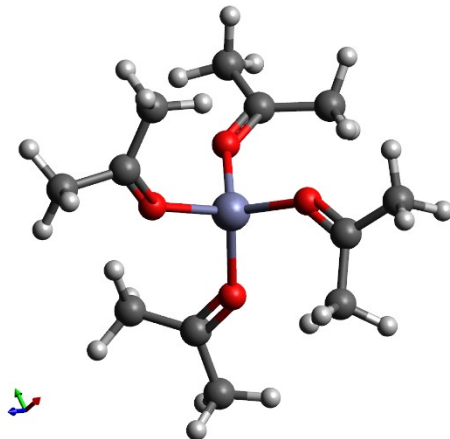

Table S2: Energies, unscaled vibrational frequencies, intensities (km/mol), and geometries (xyz coordinates) of  $\text{Cu}^+(\text{Ace})_n(\text{N}_2)_k$  ( $n = 1$  and  $4$ ,  $k = 0-2$ ) and  $\text{M}^{2+}(\text{Ace})_4$  ( $\text{M} = \text{Co}, \text{Ni}, \text{Cu},$  and  $\text{Zn}$ ) calculated at the  $\omega\text{B97X-D/6-311+G(d,p)}$  level of theory.

|                                |              |                      |              |
|--------------------------------|--------------|----------------------|--------------|
| Molecule                       | Multiplicity | E (no zpe)           | E (w/ zpe)   |
| Cu                             | 1            | -1640.17928          | -1640.17928  |
| <hr/>                          |              |                      |              |
| Molecule                       | Multiplicity | E (no zpe)           | E (w/ zpe)   |
| $\text{N}_2$                   | 1            | -109.5178987         | -109.5122277 |
| Frequency                      | Intensity    |                      |              |
| 2489.428                       | 0            |                      |              |
| Atom                           |              | Standard Orientation |              |
| N                              | 0.00000000   | 0.00000000           | 0.00000000   |
| N                              | 0.00000000   | 0.00000000           | -1.09231200  |
| <hr/>                          |              |                      |              |
| Molecule                       | Multiplicity | E (no zpe)           | E (w/ zpe)   |
| $\text{C}_3\text{H}_6\text{O}$ | 1            | -193.1492361         | -193.0653111 |
| Frequency                      | Intensity    |                      |              |
| 78.7                           | 0.03         |                      |              |
| 123.9                          | 0.09         |                      |              |
| 384.8                          | 1.53         |                      |              |
| 491.4                          | 0.55         |                      |              |
| 541.2                          | 14.04        |                      |              |
| 798                            | 1.45         |                      |              |
| 884.5                          | 0.2          |                      |              |
| 900.5                          | 5.93         |                      |              |
| 1085.5                         | 0.02         |                      |              |
| 1120.2                         | 3.59         |                      |              |
| 1246.6                         | 65.33        |                      |              |
| 1390.1                         | 20.06        |                      |              |
| 1398.9                         | 78.38        |                      |              |
| 1464.8                         | 1.13         |                      |              |
| 1466.9                         | 10.01        |                      |              |
| 1474.6                         | 20.57        |                      |              |
| 1490.6                         | 24.67        |                      |              |
| 1835.1                         | 223.61       |                      |              |
| 3045.2                         | 1.58         |                      |              |
| 3050.2                         | 5.76         |                      |              |
| 3114.8                         | 1.26         |                      |              |



|        |       |
|--------|-------|
| 3120.4 | 17.9  |
| 3167.4 | 10.89 |
| 3168.8 | 7.03  |

| Atom | Standard Orientation |             |             |
|------|----------------------|-------------|-------------|
| C    | 0.00000000           | 0.00000000  | 0.00000000  |
| C    | 0.00000000           | -1.28480900 | -0.79829600 |
| O    | 0.00000000           | -1.28480900 | -2.00531300 |
| C    | 0.00000000           | -2.56961800 | 0.00000000  |
| H    | -0.76737200          | -2.54216300 | 0.77867800  |
| H    | -0.16203100          | -3.42154500 | -0.65872300 |
| H    | 0.96567400           | -2.68018500 | 0.50387100  |
| H    | -0.96567400          | 0.11056700  | 0.50387100  |
| H    | 0.76737200           | -0.02745500 | 0.77867800  |
| H    | 0.16203100           | 0.85192700  | -0.65872300 |

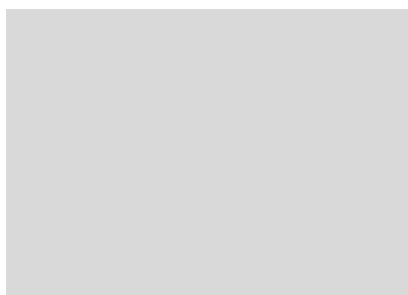


---

| Molecule              | Multiplicity | E (no zpe)   | E (w/ zpe)   |
|-----------------------|--------------|--------------|--------------|
| Cu <sup>+</sup> (Ace) | 1            | -1833.413631 | -1833.328221 |

| Frequency | Intensity |
|-----------|-----------|
| 89.8      | 5.85      |
| 98.9      | 5.42      |
| 126.1     | 0.73      |
| 137.3     | 8.35      |
| 283.3     | 4.4       |
| 428.5     | 5.98      |
| 499.3     | 0.62      |
| 581.4     | 22.79     |
| 833.2     | 0.35      |
| 889.1     | 1.87      |
| 937.1     | 4.04      |
| 1095.5    | 1.7       |
| 1115      | 12.72     |

|        |        |
|--------|--------|
| 1292.7 | 26.68  |
| 1397   | 35.5   |
| 1413.8 | 93.26  |
| 1443.7 | 43.11  |
| 1453.7 | 5.06   |
| 1473.4 | 30.45  |
| 1484.9 | 34.84  |
| 1726.1 | 354.08 |
| 3044.5 | 8.14   |
| 3050   | 9.6    |
| 3121.6 | 0.4    |
| 3126.1 | 3.53   |
| 3161.4 | 5.6    |
| 3187.4 | 0.76   |

| Atom | Standard Orientation |             |             |
|------|----------------------|-------------|-------------|
| C    | 0.00000000           | 0.00000000  | 0.00000000  |
| C    | -0.18868200          | -1.477407   | 0.00634800  |
| O    | -1.31115500          | -1.99892700 | 0.01430500  |
| Cu   | -3.13901200          | -1.49119100 | 0.00328500  |
| C    | 1.01039700           | -2.35669600 | 0.00695600  |
| H    | 1.78336000           | -1.95568700 | 0.66622800  |
| H    | 0.75116700           | -3.37766500 | 0.27894300  |
| H    | 1.42794700           | -2.35078400 | -1.00732000 |
| H    | 0.30654600           | 0.30385600  | 1.00794300  |
| H    | 0.81282100           | 0.28311500  | -0.67200100 |
| H    | -0.91428500          | 0.53040100  | -0.26862900 |

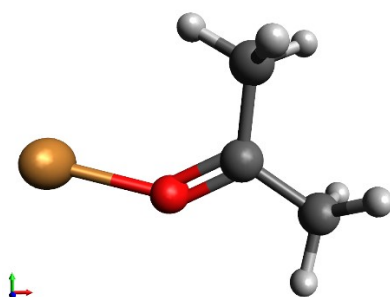


---

|                                        |              |              |              |
|----------------------------------------|--------------|--------------|--------------|
| Molecule                               | Multiplicity | E (no zpe)   | E (w/ zpe)   |
| Cu <sup>+</sup> (Ace)(N <sub>2</sub> ) | 1            | -1942.971511 | -1942.878048 |
| Frequency                              | Intensity    |              |              |
| 46.6                                   | 0.7          |              |              |

|        |        |
|--------|--------|
| 49.8   | 0.7    |
| 93.9   | 2.21   |
| 113.7  | 1.92   |
| 124.2  | 0.89   |
| 152.5  | 6.6    |
| 251.9  | 4.38   |
| 268.1  | 0.62   |
| 271.4  | 1.82   |
| 371.6  | 1.31   |
| 441.5  | 3.95   |
| 500    | 0.51   |
| 585.1  | 23.02  |
| 835.1  | 0.55   |
| 889.5  | 2.12   |
| 937.7  | 3.91   |
| 1097.5 | 1.49   |
| 1115.9 | 12.88  |
| 1294.7 | 28.81  |
| 1397.3 | 39.03  |
| 1414.7 | 97.09  |
| 1444.4 | 46.05  |
| 1454.1 | 4.59   |
| 1473.3 | 29.56  |
| 1485.4 | 34.31  |
| 1731.9 | 425.76 |
| 2488   | 3.83   |
| 3045.1 | 8.31   |
| 3050.4 | 9.64   |
| 3121.8 | 0.19   |
| 3126.5 | 2.95   |
| 3164.7 | 5.06   |
| 3187.4 | 0.73   |

| Atom | Standard Orientation |             |             |
|------|----------------------|-------------|-------------|
| C    | 0.00000000           | 0.00000000  | 0.00000000  |
| C    | 0.10968100           | -1.48528500 | -0.00547700 |
| O    | 1.20404400           | -2.06317600 | -0.01507900 |
| Cu   | 3.03680000           | -1.69324300 | -0.00719000 |
| N    | 4.90761400           | -1.43892500 | -0.00191100 |
| N    | 5.99063300           | -1.29508900 | 0.00112100  |
| C    | -1.13325400          | -2.30052700 | -0.00333700 |
| H    | -1.88558600          | -1.86026100 | -0.66139300 |
| H    | -0.92790200          | -3.33382200 | -0.27484400 |
| H    | -1.54833200          | -2.27205400 | 1.01157700  |

|   |             |            |             |
|---|-------------|------------|-------------|
| H | -0.28762000 | 0.31806400 | -1.00918700 |
| H | -0.79866500 | 0.32579100 | 0.66958700  |
| H | 0.94094300  | 0.48038400 | 0.26915800  |

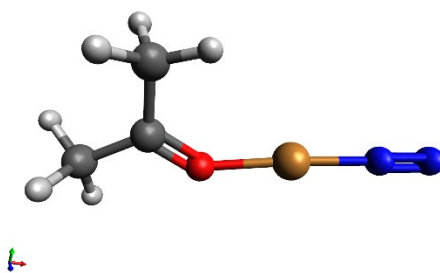


---

| Molecule                                            | Multiplicity | E (no zpe)   | E (w/ zpe)   |
|-----------------------------------------------------|--------------|--------------|--------------|
| Cu <sup>+</sup> (Ace)(N <sub>2</sub> ) <sub>2</sub> | 1            | -2052.497232 | -2052.397399 |

| Frequency | Intensity |
|-----------|-----------|
| 13.6      | 0.67      |
| 22.4      | 0.72      |
| 39.7      | 0.14      |
| 43.5      | 0.52      |
| 87.4      | 2.7       |
| 95.4      | 4.11      |
| 117.2     | 0.47      |
| 130.6     | 3.19      |
| 179.3     | 0.01      |
| 185       | 0.01      |
| 204.3     | 0.44      |
| 214.8     | 0.9       |
| 224.8     | 3.78      |
| 244.7     | 0.73      |
| 273.9     | 2.35      |
| 420.7     | 6         |
| 499.1     | 0.65      |
| 566.1     | 23.22     |
| 830.7     | 0.38      |
| 889.6     | 1.71      |
| 933       | 3.48      |
| 1096      | 1.09      |
| 1118.1    | 10.39     |
| 1288.4    | 31.37     |
| 1399.4    | 34.86     |
| 1415.5    | 91.28     |
| 1449.3    | 35.84     |

|        |        |
|--------|--------|
| 1457.3 | 4.86   |
| 1473.9 | 31.26  |
| 1485.4 | 31.03  |
| 1754.2 | 404.64 |
| 2482.4 | 1.51   |
| 2487.3 | 0.44   |
| 3047.6 | 4.3    |
| 3053   | 5.9    |
| 3122.3 | 0.21   |
| 3127.4 | 2.11   |
| 3162.9 | 6.86   |
| 3185.3 | 0.98   |

| Atom | Standard Orientation |             |             |
|------|----------------------|-------------|-------------|
| C    | 0.00000000           | 0.00000000  | 0.00000000  |
| C    | 0.17832800           | -0.11030300 | 1.47828200  |
| O    | 1.29522600           | -0.15718500 | 1.99535300  |
| Cu   | 3.19682000           | -0.11084300 | 1.58780000  |
| N    | 4.29401900           | 1.56316300  | 1.47903700  |
| N    | 4.88360800           | 2.48154000  | 1.43064700  |
| N    | 4.25190400           | -1.82707300 | 1.42469000  |
| N    | 4.81123100           | -2.76206900 | 1.34733700  |
| C    | -1.03460800          | -0.16893900 | 2.34188900  |
| H    | -1.78898500          | -0.82586700 | 1.90282700  |
| H    | -0.78233100          | -0.48522100 | 3.35187000  |
| H    | -1.47444500          | 0.83448600  | 2.37790000  |
| H    | -0.32038000          | -0.97748900 | -0.37814200 |
| H    | -0.79716900          | 0.70589300  | -0.24251200 |
| H    | 0.92547800           | 0.28830400  | -0.49905100 |

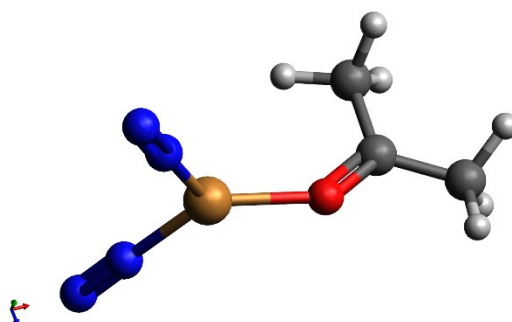


---

| Molecule                           | Multiplicity | E (no zpe)   | E (w/ zpe)   |
|------------------------------------|--------------|--------------|--------------|
| Cu <sup>+</sup> (Ace) <sub>2</sub> | 1            | -2026.642642 | -2026.471123 |

| Frequency | Intensity |
|-----------|-----------|
| 11.2      | 3.75      |
| 35.9      | 3.77      |
| 39.3      | 2.87      |
| 85.1      | 0.17      |
| 85.6      | 0.2       |
| 100.2     | 1.05      |
| 122.3     | 0.42      |
| 125.1     | 0.23      |
| 134.7     | 0.25      |
| 157.3     | 2.95      |
| 197       | 11.21     |
| 231.5     | 0         |
| 333.6     | 1.49      |
| 419.4     | 0         |
| 441.7     | 12.42     |
| 498.4     | 0.21      |
| 499.6     | 0.74      |
| 585.3     | 0         |
| 604.8     | 42.58     |
| 831.1     | 0.03      |
| 833.7     | 1.47      |
| 891.1     | 0         |
| 891.2     | 3.79      |
| 937.3     | 1.12      |
| 937.4     | 5.76      |
| 1095.9    | 0.11      |
| 1096.9    | 1.3       |
| 1117.1    | 3.65      |
| 1117.3    | 17.49     |
| 1291.6    | 0.25      |
| 1291.7    | 58.63     |
| 1398.9    | 69.42     |
| 1399.1    | 0.02      |
| 1415.6    | 15.04     |
| 1415.6    | 169.06    |
| 1448.3    | 84.11     |
| 1448.4    | 0.35      |
| 1457      | 10.44     |
| 1457.1    | 0.08      |
| 1473.6    | 47.45     |
| 1473.6    | 1.01      |
| 1486      | 19.95     |
| 1486.3    | 43.44     |
| 1740.5    | 791.42    |

|        |       |
|--------|-------|
| 1749.6 | 0.07  |
| 3046.8 | 1.28  |
| 3046.8 | 8.65  |
| 3052.6 | 10.32 |
| 3052.7 | 0.02  |
| 3122.6 | 0.54  |
| 3122.6 | 0.01  |
| 3127.2 | 0.35  |
| 3127.2 | 3.41  |
| 3164.3 | 8.96  |
| 3164.3 | 0.13  |
| 3185.5 | 0.04  |
| 3185.5 | 2.02  |

| Atom | Standard Orientation |             |             |
|------|----------------------|-------------|-------------|
| C    | 0.00000000           | 0.00000000  | 0.00000000  |
| C    | -1.26587500          | -0.78733400 | -0.05863900 |
| O    | -1.27218600          | -2.02118500 | -0.07842500 |
| Cu   | 0.00000000           | -3.40415800 | -0.07454500 |
| O    | 1.27218600           | -4.78713100 | -0.07842500 |
| C    | 1.26587500           | -6.02098200 | -0.05863900 |
| C    | 0.00000000           | -6.80831600 | 0.00000000  |
| H    | 0.06357300           | -7.69381900 | -0.63543000 |
| H    | -0.12554500          | -7.16498900 | 1.02899000  |
| H    | -0.86664900          | -6.20562200 | -0.27297500 |
| C    | 2.56310800           | -6.75186400 | -0.08697300 |
| H    | 2.54918900           | -7.58849200 | 0.61525100  |
| H    | 2.68623800           | -7.18257700 | -1.08750600 |
| H    | 3.39521200           | -6.08198800 | 0.11909100  |
| C    | -2.56310800          | -0.05645200 | -0.08697300 |
| H    | -2.54918900          | 0.78017600  | 0.61525100  |
| H    | -2.68623800          | 0.37426100  | -1.08750600 |
| H    | -3.39521200          | -0.72632800 | 0.11909100  |
| H    | -0.06357300          | 0.88550300  | -0.63543000 |
| H    | 0.12554500           | 0.35667300  | 1.02899000  |
| H    | 0.86664900           | -0.60269400 | -0.27297500 |

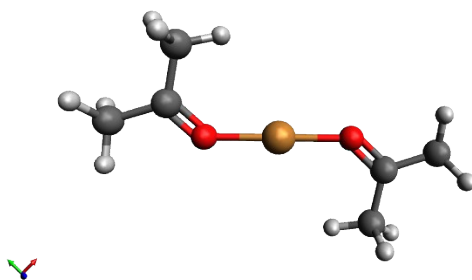

---

|                                    |              |              |              |
|------------------------------------|--------------|--------------|--------------|
| Molecule                           | Multiplicity | E (no zpe)   | E (w/ zpe)   |
| Cu <sup>+</sup> (Ace) <sub>3</sub> | 1            | -2219.821446 | -2219.564956 |

| Frequency | Intensity |
|-----------|-----------|
| 16.2      | 0.12      |
| 18.1      | 0.09      |
| 26        | 6.29      |
| 30.3      | 2.11      |
| 32.4      | 1.36      |
| 38.2      | 0.61      |
| 82.2      | 0.09      |
| 83.7      | 0.25      |
| 103.7     | 3.61      |
| 109       | 1.08      |
| 110.2     | 5.23      |
| 112.6     | 4.77      |
| 122.5     | 0.44      |
| 124.3     | 0.49      |
| 127.8     | 2.26      |
| 131.4     | 1.6       |
| 135.7     | 0.83      |
| 162.9     | 9.69      |
| 198.3     | 0.02      |
| 218.2     | 9.83      |
| 221.9     | 9.68      |
| 409.7     | 0.05      |
| 412.8     | 11.15     |
| 413.5     | 11.39     |
| 497.9     | 0.44      |
| 498.9     | 0.41      |
| 499.1     | 0.79      |
| 575       | 3.31      |
| 576.4     | 28.37     |
| 577       | 28.97     |
| 822.5     | 0.14      |
| 823.1     | 0.51      |
| 823.2     | 0.5       |
| 890.9     | 2.01      |
| 891.6     | 0.16      |
| 891.8     | 1.95      |
| 933.3     | 3.87      |
| 933.5     | 2.84      |
| 934.8     | 3.38      |



|        |        |
|--------|--------|
| 1094.5 | 1.27   |
| 1094.6 | 1.24   |
| 1095.5 | 0.02   |
| 1121.3 | 0.88   |
| 1121.6 | 3.92   |
| 1122   | 18     |
| 1284.3 | 62.23  |
| 1284.4 | 59.6   |
| 1284.9 | 3.62   |
| 1400.5 | 43.81  |
| 1400.7 | 15.62  |
| 1400.8 | 40.84  |
| 1415.1 | 12.06  |
| 1415.4 | 120.89 |
| 1415.6 | 117.62 |
| 1455.6 | 54.72  |
| 1456.7 | 54.41  |
| 1457.1 | 3.97   |
| 1461.3 | 2.27   |
| 1461.7 | 2.33   |
| 1461.9 | 1.88   |
| 1474.7 | 4.12   |
| 1475.7 | 27.29  |
| 1475.9 | 27.42  |
| 1489.7 | 15.71  |
| 1490.7 | 10.28  |
| 1492   | 40.06  |
| 1755   | 569.32 |
| 1755.1 | 576.89 |
| 1766.5 | 0.13   |
| 3047.5 | 2.44   |
| 3047.7 | 2.88   |
| 3047.7 | 4.55   |
| 3053.8 | 0.21   |
| 3054   | 0.27   |
| 3054.3 | 0.3    |
| 3121.9 | 1.97   |
| 3122.1 | 1.63   |
| 3122.3 | 1.42   |
| 3126.5 | 0.7    |
| 3126.9 | 0.78   |
| 3127   | 0.72   |
| 3166.1 | 0.21   |
| 3166.1 | 0.16   |
| 3167.6 | 0.14   |

|        |      |
|--------|------|
| 3181   | 1.67 |
| 3181   | 4.3  |
| 3181.6 | 3.02 |

| Atom | Standard Orientation |             |             |
|------|----------------------|-------------|-------------|
| C    | 0.00000000           | 0.00000000  | 0.00000000  |
| C    | -0.19965600          | -1.41755700 | 0.43521200  |
| O    | -1.31908800          | -1.90389500 | 0.57324000  |
| Cu   | -3.18175200          | -1.14564800 | 0.39792000  |
| O    | -3.44548700          | 0.85757600  | 0.30731400  |
| C    | -4.43144100          | 1.57988700  | 0.42822200  |
| C    | -5.78367800          | 1.02634000  | 0.75088700  |
| H    | -5.97977600          | 1.21505100  | 1.81253200  |
| H    | -6.56078900          | 1.54780500  | 0.18829000  |
| H    | -5.83022500          | -0.04741500 | 0.56775400  |
| C    | -4.29644000          | 3.05914100  | 0.26071600  |
| H    | -4.76460000          | 3.34250200  | -0.68833500 |
| H    | -4.83913300          | 3.58636200  | 1.04898900  |
| H    | -3.24989100          | 3.35702200  | 0.24781500  |
| O    | -4.79215600          | -2.36426600 | 0.34082400  |
| C    | -4.91691000          | -3.58580700 | 0.31108700  |
| C    | -6.28211800          | -4.19478100 | 0.30921100  |
| H    | -6.34123700          | -5.00629600 | -0.41987100 |
| H    | -6.46095100          | -4.64110900 | 1.29363500  |
| H    | -7.04432500          | -3.44346200 | 0.11231100  |
| C    | -3.73523400          | -4.50272000 | 0.27030800  |
| H    | -3.64084300          | -4.88638300 | -0.75185100 |
| H    | -2.81562700          | -3.98355900 | 0.54096400  |
| H    | -3.89485300          | -5.36724600 | 0.91826300  |
| C    | 1.01218100           | -2.25255900 | 0.69733200  |
| H    | 1.75701400           | -2.10772900 | -0.08882200 |
| H    | 1.46969700           | -1.91093200 | 1.63228700  |
| H    | 0.74909900           | -3.30434100 | 0.79064100  |
| H    | 0.81861800           | 0.46361900  | 0.55449900  |
| H    | 0.29755400           | -0.01004500 | -1.05471600 |
| H    | -0.91504300          | 0.58347600  | 0.10432900  |

---

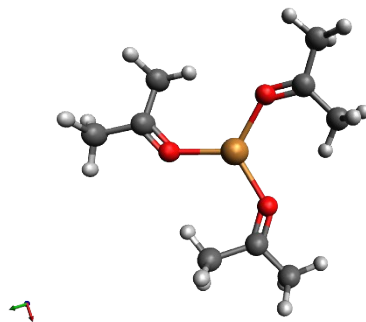


---

| Molecule                           | Multiplicity | E (no zpe)   | E (w/ zpe) |
|------------------------------------|--------------|--------------|------------|
| Cu <sup>+</sup> (Ace) <sub>4</sub> | 1            | -2412.996732 | -2412.6553 |

| Frequency | Intensity |
|-----------|-----------|
| 12.1      | 0.7       |
| 14.7      | 0.12      |
| 17.1      | 0.44      |
| 25        | 2.03      |
| 26.1      | 0.09      |
| 27.6      | 0.26      |
| 37.4      | 2.39      |
| 45.2      | 2.05      |
| 49.8      | 1.68      |
| 64.3      | 0.08      |
| 81        | 0.82      |
| 93.9      | 3.15      |
| 95.9      | 4.89      |
| 100       | 3.4       |
| 101.5     | 3.12      |
| 108.8     | 7.54      |
| 110.1     | 3.24      |
| 116.8     | 1.47      |
| 117.4     | 1.19      |
| 122.4     | 2.25      |
| 124.2     | 4.98      |
| 131       | 4.4       |
| 138.6     | 6.45      |
| 140.7     | 6.09      |
| 159.5     | 2.86      |
| 165.6     | 1.34      |
| 173.1     | 1.55      |
| 174.8     | 3.3       |
| 176.4     | 8         |
| 402.9     | 4.1       |
| 404.1     | 1.98      |

|        |       |
|--------|-------|
| 405.7  | 8.57  |
| 411.2  | 9.55  |
| 495.7  | 1.25  |
| 497.4  | 0.21  |
| 499.2  | 1.01  |
| 508.9  | 0.5   |
| 563.6  | 17.05 |
| 565.5  | 13.62 |
| 567.2  | 19.72 |
| 568.2  | 20.08 |
| 815.5  | 0.6   |
| 817.4  | 0.13  |
| 818    | 1.07  |
| 821    | 0.63  |
| 889.2  | 0.25  |
| 890.7  | 0.86  |
| 891.4  | 1.13  |
| 892.4  | 1.27  |
| 927.8  | 3.75  |
| 928.6  | 2.45  |
| 931.3  | 3.49  |
| 956.8  | 4.6   |
| 1086.2 | 3.81  |
| 1092.2 | 0.07  |
| 1093.7 | 0.52  |
| 1095.5 | 0.25  |
| 1120.6 | 0.08  |
| 1121.1 | 8.45  |
| 1122.4 | 5.58  |
| 1122.9 | 12.24 |
| 1272.7 | 62.46 |
| 1275.2 | 31.9  |
| 1277.8 | 53.92 |
| 1281.6 | 43.55 |
| 1397.1 | 15.45 |
| 1398.9 | 18.81 |
| 1400.7 | 47.12 |
| 1401.6 | 30.76 |
| 1403   | 75.54 |
| 1412.2 | 72.95 |
| 1414.3 | 76.54 |
| 1415.1 | 88.58 |
| 1457.2 | 15.2  |
| 1460.3 | 33.28 |

|        |        |
|--------|--------|
| 1461.5 | 42.97  |
| 1462.4 | 5.91   |
| 1463.2 | 20.27  |
| 1463.6 | 13.6   |
| 1465   | 6.94   |
| 1471.1 | 5.59   |
| 1474.9 | 20.91  |
| 1476   | 23.79  |
| 1477.1 | 16.38  |
| 1481.9 | 16.84  |
| 1489   | 6.08   |
| 1489.3 | 9.42   |
| 1493.4 | 22.32  |
| 1494.1 | 34.99  |
| 1766   | 474.03 |
| 1769.3 | 411.26 |
| 1772.5 | 308.93 |
| 1786.9 | 152.21 |
| 3046.9 | 0.71   |
| 3047.2 | 5.09   |
| 3047.7 | 2.4    |
| 3049.9 | 1.6    |
| 3053.5 | 2.71   |
| 3053.9 | 0.15   |
| 3053.9 | 0.29   |
| 3054   | 0.46   |
| 3118.1 | 0.94   |
| 3120   | 2.98   |
| 3120.9 | 1.49   |
| 3121   | 1.56   |
| 3125.1 | 1.49   |
| 3125.7 | 0.78   |
| 3125.8 | 3.55   |
| 3127.6 | 0.26   |
| 3163.9 | 1.7    |
| 3165.6 | 6.11   |
| 3166.8 | 0.73   |
| 3172.3 | 2.07   |
| 3176.8 | 4.44   |
| 3178   | 3.72   |
| 3178.1 | 5.86   |
| 3178.5 | 3.82   |

Atom

Standard Orientation

|    |             |             |             |
|----|-------------|-------------|-------------|
| Cu | 0.00000000  | 0.00000000  | 0.00000000  |
| O  | -1.80101700 | -1.02784200 | 0.24210000  |
| C  | -2.08970900 | -2.21865700 | 0.26601600  |
| C  | -3.50782900 | -2.64374600 | 0.49522300  |
| H  | -3.79733600 | -3.41622100 | -0.22161300 |
| H  | -3.58053500 | -3.09552700 | 1.49025900  |
| H  | -4.18464600 | -1.79334200 | 0.43539200  |
| C  | -1.06158700 | -3.28776200 | 0.06224400  |
| H  | -1.18231800 | -3.68291800 | -0.95287300 |
| H  | -0.05094100 | -2.89491800 | 0.17074700  |
| H  | -1.23041400 | -4.12194700 | 0.74694100  |
| O  | 1.69033100  | -1.26015900 | 0.02596100  |
| C  | 2.86093800  | -0.91542200 | -0.07217600 |
| C  | 3.21925300  | 0.53093800  | -0.26053800 |
| H  | 2.86486100  | 1.08927300  | 0.61125000  |
| H  | 4.29007300  | 0.68661700  | -0.38649700 |
| H  | 2.67925200  | 0.91748500  | -1.12933500 |
| C  | 3.96096500  | -1.92592300 | -0.00206800 |
| H  | 4.54106100  | -1.89281600 | -0.92969800 |
| H  | 4.64951500  | -1.65846000 | 0.80545700  |
| H  | 3.56525600  | -2.92718100 | 0.15682400  |
| O  | 0.37419200  | 1.30686900  | 1.60230400  |
| C  | -0.35082800 | 1.90351800  | 2.38502500  |
| C  | -1.84669900 | 1.82875100  | 2.29151100  |
| H  | -2.29305600 | 1.73238900  | 3.28389100  |
| H  | -2.21140700 | 2.77288500  | 1.87199100  |
| H  | -2.15951700 | 1.00431900  | 1.65062100  |
| C  | 0.23939700  | 2.74618800  | 3.47467600  |
| H  | -0.27348600 | 3.70901000  | 3.53910500  |
| H  | 0.08143200  | 2.23886300  | 4.43235600  |
| H  | 1.30658900  | 2.89119500  | 3.31761000  |
| O  | 0.09417000  | 1.03601200  | -1.81055000 |
| C  | -0.75212900 | 1.61243100  | -2.47858100 |
| C  | -0.37878400 | 2.27402700  | -3.76987000 |
| H  | -0.80036600 | 1.69157600  | -4.59596400 |
| H  | -0.81783700 | 3.27293100  | -3.83185400 |
| H  | 0.70270000  | 2.32411600  | -3.88111600 |
| C  | -2.18524800 | 1.69132200  | -2.03995800 |
| H  | -2.86057600 | 1.54562400  | -2.88598600 |
| H  | -2.39513200 | 0.96518300  | -1.25419300 |
| H  | -2.37049100 | 2.70107500  | -1.65725600 |

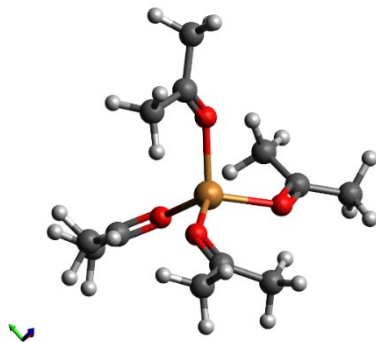


---

| Molecule                                | Multiplicity | E (no zpe)   | E (w/ zpe)   |
|-----------------------------------------|--------------|--------------|--------------|
| $\text{Cu}^+(\text{Pin})(\text{Ace})_2$ | 1            | -2412.890862 | -2412.541314 |

| Frequency | Intensity |
|-----------|-----------|
| 32.7      | 5.65      |
| 38.3      | 0.08      |
| 45        | 0.47      |
| 51.9      | 2.04      |
| 55.5      | 5.32      |
| 68.8      | 0.73      |
| 104.6     | 0.77      |
| 126.2     | 0.55      |
| 131.1     | 1.05      |
| 134.6     | 1.44      |
| 155.9     | 1.19      |
| 167.2     | 0.43      |
| 198.6     | 0.15      |
| 213.2     | 0.02      |
| 213.8     | 0.05      |
| 219.5     | 0.2       |
| 230       | 2.97      |
| 238.1     | 5.82      |
| 240.2     | 6.55      |
| 247.8     | 2.54      |
| 278.7     | 2.75      |
| 289.6     | 1.63      |
| 300.1     | 0.89      |
| 318.5     | 0.24      |
| 348.9     | 2.47      |
| 360       | 2.47      |
| 368.6     | 0         |
| 394.6     | 12.39     |
| 424.8     | 4.43      |
| 437.2     | 26.13     |

|        |        |
|--------|--------|
| 457.8  | 0.89   |
| 497.1  | 7.01   |
| 506.6  | 0.82   |
| 507.8  | 0.34   |
| 520.4  | 0.23   |
| 560.2  | 4.77   |
| 612.6  | 15.62  |
| 621    | 23.96  |
| 646.6  | 15.49  |
| 715.2  | 40.93  |
| 736.6  | 23.26  |
| 829.8  | 2.69   |
| 832.3  | 6.04   |
| 847.9  | 4.25   |
| 889.9  | 1.18   |
| 891.3  | 0.88   |
| 903.3  | 27.54  |
| 937.8  | 1.35   |
| 946.4  | 0.07   |
| 952.4  | 2.25   |
| 957.1  | 3.91   |
| 957.7  | 4.71   |
| 979.5  | 22.58  |
| 1008.4 | 2.68   |
| 1018.8 | 3.74   |
| 1093.6 | 2.75   |
| 1098   | 1.27   |
| 1116.9 | 8.76   |
| 1118.4 | 12.95  |
| 1149.6 | 10.16  |
| 1177.7 | 124.58 |
| 1195.2 | 24.25  |
| 1231.3 | 2.31   |
| 1272.3 | 13.55  |
| 1290.3 | 27.62  |
| 1292.3 | 27.83  |
| 1333.8 | 1.57   |
| 1395.6 | 24.23  |
| 1396.9 | 16.6   |
| 1403.5 | 90.57  |
| 1404.5 | 23.52  |
| 1406.4 | 73.63  |
| 1406.8 | 10.32  |
| 1415.5 | 20.56  |
| 1425.9 | 6.21   |



|        |        |
|--------|--------|
| 1450.5 | 75.64  |
| 1453.6 | 48.56  |
| 1457.9 | 18.71  |
| 1458.3 | 2.58   |
| 1470.2 | 18     |
| 1472   | 18.88  |
| 1476.2 | 0.05   |
| 1477.9 | 6.92   |
| 1486.1 | 26.52  |
| 1488   | 0.6    |
| 1494   | 21.98  |
| 1506   | 12.97  |
| 1507.5 | 15.27  |
| 1508.4 | 16.3   |
| 1513.5 | 8      |
| 1527.2 | 0.45   |
| 1725.8 | 731.15 |
| 1738   | 178.04 |
| 3052.3 | 5.11   |
| 3052.5 | 4.5    |
| 3052.8 | 5.41   |
| 3053.1 | 17.47  |
| 3056.5 | 9.8    |
| 3057.3 | 3.16   |
| 3060   | 4.68   |
| 3060.2 | 4.23   |
| 3121.8 | 0.14   |
| 3122.7 | 0.19   |
| 3130.1 | 3.42   |
| 3130.2 | 1.04   |
| 3134.8 | 4.95   |
| 3135.8 | 28.1   |
| 3138.4 | 2.01   |
| 3139.1 | 1.55   |
| 3139.6 | 15.16  |
| 3140.6 | 27.47  |
| 3161.7 | 0.01   |
| 3162.5 | 19.63  |
| 3174.6 | 5.92   |
| 3177.1 | 6.55   |
| 3188   | 1.86   |
| 3188.1 | 2.23   |

Atom  
C

Standard Orientation

0.00000000      0.00000000      0.00000000

|    |             |             |             |
|----|-------------|-------------|-------------|
| C  | -0.82867200 | -0.64919600 | 1.05531800  |
| O  | -0.67113800 | -1.82418300 | 1.40035400  |
| Cu | 0.70546300  | -3.08000900 | 0.92386000  |
| O  | -0.67475800 | -4.33147100 | 0.44620100  |
| C  | -0.83818000 | -5.50495900 | 0.79386700  |
| C  | -0.01504000 | -6.15126500 | 1.85556000  |
| H  | 0.31042000  | -5.43112800 | 2.60655200  |
| H  | -0.54893400 | -6.98014700 | 2.31984600  |
| H  | 0.88484500  | -6.54216000 | 1.36835900  |
| C  | -1.89305900 | -6.30661000 | 0.11542400  |
| H  | -1.47784300 | -7.26924000 | -0.19596800 |
| H  | -2.68172000 | -6.52678900 | 0.84297100  |
| H  | -2.31155500 | -5.77261200 | -0.73460900 |
| O  | 1.98667200  | -1.92672900 | 1.31500600  |
| C  | 3.28508800  | -2.32016300 | 0.81778700  |
| C  | 4.29998000  | -1.54845700 | 1.65188800  |
| H  | 5.31171100  | -1.87290700 | 1.39091600  |
| H  | 4.22583300  | -0.47954400 | 1.44136300  |
| H  | 4.14273300  | -1.70256900 | 2.71891100  |
| C  | 3.39782500  | -1.92571300 | -0.65319600 |
| H  | 4.41028600  | -2.08645000 | -1.02925500 |
| H  | 2.70758900  | -2.49959100 | -1.27645100 |
| H  | 3.16809400  | -0.86295500 | -0.75671300 |
| C  | 3.28293800  | -3.84629900 | 1.03129400  |
| O  | 1.98410200  | -4.23617000 | 0.53234300  |
| C  | 4.29677900  | -4.62073500 | 0.19846000  |
| H  | 5.30905900  | -4.29893300 | 0.46057100  |
| H  | 4.21962700  | -5.68945000 | 0.40896300  |
| H  | 4.14116400  | -4.46631300 | -0.86875800 |
| C  | 3.39273600  | -4.24099700 | 2.50243700  |
| H  | 2.70338600  | -3.66512900 | 3.12480600  |
| H  | 3.15970700  | -5.30303600 | 2.60590400  |
| H  | 4.40523000  | -4.08320600 | 2.87965900  |
| C  | -1.88614500 | 0.15303300  | 1.72978500  |
| H  | -1.47789300 | 1.12169500  | 2.03077000  |
| H  | -2.67885200 | 0.35927600  | 1.00244300  |
| H  | -2.29918300 | -0.37619500 | 2.58548700  |
| H  | -0.55168400 | 0.79950200  | -0.49482600 |
| H  | 0.87014500  | 0.43824600  | 0.50089200  |
| H  | 0.37199000  | -0.72296800 | -0.72557400 |

---

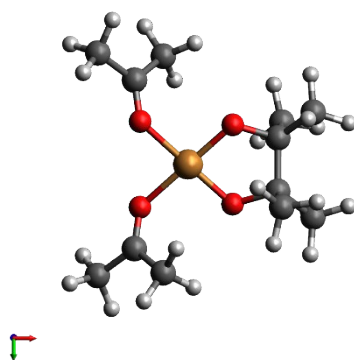


---

| Molecule                            | Multiplicity | E (no zpe)   | E (w/ zpe)   |
|-------------------------------------|--------------|--------------|--------------|
| Co <sup>2+</sup> (Ace) <sub>3</sub> | 4            | -1961.711868 | -1961.455138 |

| Frequency | Intensity |
|-----------|-----------|
| 23.3      | 1.18      |
| 26.9      | 1.9       |
| 27.7      | 1.49      |
| 28.1      | 0.6       |
| 34.2      | 1.11      |
| 41        | 2.02      |
| 77.8      | 1.08      |
| 99.5      | 0.36      |
| 102.6     | 0.79      |
| 113       | 7.18      |
| 116.3     | 3.97      |
| 118.2     | 5.11      |
| 125.7     | 0.4       |
| 126       | 1.12      |
| 130.4     | 1.4       |
| 138.8     | 1.12      |
| 140.3     | 0.65      |
| 188.3     | 27.57     |
| 246.9     | 0.02      |
| 321.2     | 16.85     |
| 322.1     | 17.41     |
| 439.9     | 0.42      |
| 458.9     | 30.95     |
| 460.3     | 30.72     |
| 502.1     | 1.03      |
| 502.9     | 1.15      |
| 503.7     | 1.56      |
| 565.4     | 0.43      |
| 572.2     | 64.52     |

|        |        |
|--------|--------|
| 572.6  | 64.99  |
| 841.1  | 0.08   |
| 842.5  | 1.52   |
| 843.3  | 1.45   |
| 886.4  | 8.14   |
| 887.5  | 8      |
| 887.6  | 4.88   |
| 937.7  | 2.92   |
| 938.3  | 3.19   |
| 938.7  | 4.53   |
| 1101.7 | 0.88   |
| 1102.4 | 8.94   |
| 1102.8 | 8.9    |
| 1110.5 | 5.09   |
| 1110.9 | 11.57  |
| 1111.9 | 33.69  |
| 1305.2 | 38.63  |
| 1305.4 | 20.73  |
| 1305.7 | 24.25  |
| 1390.7 | 106.02 |
| 1390.8 | 102.16 |
| 1391.7 | 9.02   |
| 1408.4 | 22.4   |
| 1408.8 | 114.03 |
| 1409   | 159.77 |
| 1434.3 | 82.72  |
| 1435.9 | 85.34  |
| 1436.5 | 9.89   |
| 1449.4 | 9.84   |
| 1449.9 | 1.94   |
| 1450.5 | 14.94  |
| 1470.1 | 68.58  |
| 1470.9 | 52.19  |
| 1472.2 | 41.93  |
| 1482.6 | 22.55  |
| 1483.4 | 17.3   |
| 1484.2 | 68.52  |
| 1675.6 | 852.52 |
| 1675.9 | 855.12 |
| 1705.9 | 6.17   |
| 3037.5 | 20.81  |
| 3038   | 19.34  |
| 3038.1 | 24.82  |
| 3044.3 | 28.88  |
| 3044.7 | 34.58  |

|        |      |
|--------|------|
| 3045   | 7.04 |
| 3114.7 | 0.52 |
| 3114.9 | 1.33 |
| 3114.9 | 0.72 |
| 3120.4 | 7.55 |
| 3120.8 | 8.32 |
| 3121.3 | 7.54 |
| 3169.1 | 4.96 |
| 3169.2 | 3.05 |
| 3170.8 | 4.22 |
| 3188.1 | 1.68 |
| 3188.3 | 1.85 |
| 3188.4 | 1.82 |

| Atom | Standard Orientation |             |             |
|------|----------------------|-------------|-------------|
| C    | 0.00000000           | 0.00000000  | 0.00000000  |
| C    | 1.37335400           | 0.49141900  | -0.26910800 |
| O    | 1.60921700           | 1.71170900  | -0.39001700 |
| Co   | 0.88943100           | 3.47106100  | -0.47000900 |
| O    | -0.99381900          | 3.72500800  | -0.37782800 |
| C    | -1.93558100          | 4.53800400  | -0.27091100 |
| C    | -1.68005700          | 5.99151300  | -0.12371600 |
| H    | -1.97375600          | 6.47859800  | -1.06216200 |
| H    | -2.32589800          | 6.41330000  | 0.65072300  |
| H    | -0.63341900          | 6.21113800  | 0.08472600  |
| C    | -3.32649900          | 4.03251500  | -0.29000500 |
| H    | -3.69619300          | 4.04902800  | 0.74415800  |
| H    | -3.97404700          | 4.70609100  | -0.85602800 |
| H    | -3.38438500          | 3.01572800  | -0.67264700 |
| O    | 2.05535300           | 4.97045600  | -0.36083300 |
| C    | 3.23195500           | 5.37118700  | -0.24108200 |
| C    | 3.51061700           | 6.82137700  | -0.33645900 |
| H    | 4.25761700           | 7.11969200  | 0.40294400  |
| H    | 3.96359100           | 7.00437300  | -1.32019700 |
| H    | 2.60482600           | 7.41708200  | -0.24668800 |
| C    | 4.34485500           | 4.41896800  | -0.00670600 |
| H    | 4.66418800           | 4.53050900  | 1.03731000  |
| H    | 4.05131800           | 3.38483900  | -0.18529400 |
| H    | 5.20981300           | 4.68705500  | -0.61847900 |
| C    | 2.48854300           | -0.47256500 | -0.39968500 |
| H    | 2.39140200           | -1.27680100 | 0.33330300  |
| H    | 2.39894200           | -0.94525900 | -1.38713800 |
| H    | 3.45862100           | 0.01440000  | -0.32708700 |
| H    | -0.21692300          | -0.87661000 | -0.61560100 |
| H    | -0.03259900          | -0.34436900 | 1.04146800  |

H -0.75450500 0.77210000 -0.14829800

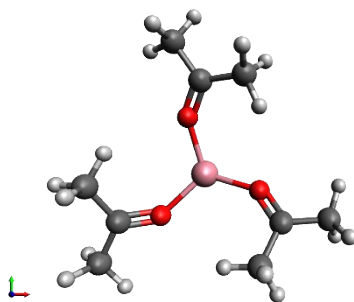

---

| Molecule                            | Multiplicity | E (no zpe)   | E (w/ zpe)   |
|-------------------------------------|--------------|--------------|--------------|
| Co <sup>2+</sup> (Ace) <sub>4</sub> | 4            | -2154.941587 | -2154.598592 |

| Frequency | Intensity |
|-----------|-----------|
| 9.8       | 0.02      |
| 20.2      | 0.44      |
| 21.5      | 1.82      |
| 30.1      | 1.64      |
| 33        | 0.14      |
| 35.8      | 2.11      |
| 39.5      | 0.72      |
| 50.3      | 1.66      |
| 52.1      | 2.28      |
| 94.2      | 0.49      |
| 98.4      | 0.71      |
| 105.7     | 4.35      |
| 106.4     | 2.23      |
| 110.3     | 0.16      |
| 114.6     | 0.16      |
| 122.8     | 0.54      |
| 125.4     | 1.24      |
| 128       | 1.12      |
| 132.3     | 1.29      |
| 137.1     | 0.32      |
| 139       | 0.29      |
| 145.4     | 4.77      |
| 157.3     | 2.55      |
| 177.8     | 10.22     |
| 187.7     | 20.57     |
| 232.3     | 0.04      |
| 283.3     | 32.13     |

|        |       |
|--------|-------|
| 289.5  | 25.66 |
| 294.9  | 22.89 |
| 426.1  | 0.9   |
| 431.4  | 19.57 |
| 433.6  | 23.25 |
| 436.7  | 19.89 |
| 502.6  | 1.1   |
| 503.7  | 0.84  |
| 504.5  | 1.13  |
| 506.1  | 1.61  |
| 575    | 20.03 |
| 577.4  | 4.06  |
| 582.9  | 62.11 |
| 587.8  | 43.39 |
| 832.8  | 1     |
| 836.5  | 0.87  |
| 836.7  | 0.82  |
| 837.9  | 1.69  |
| 886    | 3.67  |
| 886.6  | 5.91  |
| 887.4  | 2.67  |
| 888.4  | 2.8   |
| 935.3  | 2.73  |
| 936.4  | 0.05  |
| 936.6  | 5.52  |
| 942.5  | 3.28  |
| 1097.7 | 4.77  |
| 1099.6 | 5.06  |
| 1100.2 | 2.01  |
| 1101.2 | 3.79  |
| 1115.5 | 8.16  |
| 1116.5 | 1.36  |
| 1118.2 | 24.16 |
| 1118.7 | 17.63 |
| 1298.7 | 11.06 |
| 1300.5 | 51.63 |
| 1302.1 | 41.16 |
| 1303.1 | 17.39 |
| 1395.7 | 81.41 |
| 1396.4 | 79.12 |
| 1396.9 | 72.07 |
| 1397.8 | 18    |
| 1413.1 | 41.6  |
| 1413.8 | 89.13 |
| 1414   | 93.35 |

|        |        |
|--------|--------|
| 1414.6 | 138.84 |
| 1440.7 | 72.17  |
| 1443.7 | 55.44  |
| 1445.1 | 46.79  |
| 1445.6 | 33.61  |
| 1452.5 | 2.82   |
| 1455.1 | 6.75   |
| 1455.6 | 7.15   |
| 1456.5 | 4.3    |
| 1472.2 | 37.44  |
| 1472.7 | 58.7   |
| 1474.1 | 29.3   |
| 1474.7 | 39.92  |
| 1486.7 | 17.05  |
| 1487.2 | 37.75  |
| 1488.5 | 25.24  |
| 1493.5 | 35.62  |
| 1697.3 | 720.2  |
| 1702.4 | 626.52 |
| 1707.2 | 643.64 |
| 1736.2 | 56.88  |
| 3043.2 | 14.27  |
| 3043.3 | 11.92  |
| 3044.2 | 10.41  |
| 3044.9 | 10.07  |
| 3048.6 | 13.46  |
| 3049.2 | 11.43  |
| 3049.9 | 13.85  |
| 3050.8 | 12.04  |
| 3116.1 | 0.11   |
| 3118   | 0.46   |
| 3118.4 | 0.1    |
| 3118.5 | 0.13   |
| 3122.6 | 3.29   |
| 3124.3 | 3.2    |
| 3124.6 | 3.17   |
| 3125.2 | 3.5    |
| 3167.5 | 3.42   |
| 3169.8 | 3.37   |
| 3170.8 | 1.63   |
| 3173.8 | 2.26   |
| 3185.1 | 1.75   |
| 3186.2 | 1.61   |
| 3187   | 1.32   |
| 3187.8 | 1.56   |



| Atom | Standard Orientation |             |             |
|------|----------------------|-------------|-------------|
| Co   | 0.00000000           | 0.00000000  | 0.00000000  |
| O    | -1.76868800          | -0.78936800 | -0.36079300 |
| C    | -2.28956900          | -1.85089500 | -0.74496900 |
| C    | -3.76927400          | -1.94332800 | -0.82433700 |
| H    | -4.07291700          | -2.43425600 | -1.75242200 |
| H    | -4.11155200          | -2.59460600 | -0.01052600 |
| H    | -4.24059100          | -0.96760700 | -0.72645500 |
| C    | -1.46869000          | -3.02937500 | -1.13066100 |
| H    | -1.50565000          | -3.11841700 | -2.22340800 |
| H    | -0.43127600          | -2.93222800 | -0.81272800 |
| H    | -1.91115900          | -3.94723400 | -0.73650900 |
| O    | 1.43250600           | -1.34610800 | -0.16987600 |
| C    | 2.67338900           | -1.34411600 | -0.23826500 |
| C    | 3.45286200           | -0.07656200 | -0.23270200 |
| H    | 3.86187500           | 0.05429000  | 0.77683900  |
| H    | 4.30911800           | -0.14574300 | -0.90652500 |
| H    | 2.83701200           | 0.78728500  | -0.48282400 |
| C    | 3.39691000           | -2.63714000 | -0.31960400 |
| H    | 3.76016700           | -2.75406300 | -1.34838800 |
| H    | 4.28476300           | -2.62068400 | 0.31723000  |
| H    | 2.75151000           | -3.47629800 | -0.06888900 |
| O    | 0.17461400           | 0.74624700  | 1.81045400  |
| C    | -0.44521900          | 0.91774100  | 2.87045300  |
| C    | -1.84707200          | 0.44368200  | 3.03942600  |
| H    | -1.82827800          | -0.43573200 | 3.69414800  |
| H    | -2.44624800          | 1.19668600  | 3.55637400  |
| H    | -2.30616200          | 0.17506300  | 2.08821900  |
| C    | 0.22384900           | 1.60991800  | 4.00105800  |
| H    | -0.21883700          | 2.60913400  | 4.09537900  |
| H    | 0.01744300           | 1.09441800  | 4.94233500  |
| H    | 1.29437800           | 1.70652500  | 3.83406800  |
| O    | 0.38361700           | 1.50829700  | -1.21657300 |
| C    | -0.19994900          | 2.37833500  | -1.88094700 |
| C    | 0.59978300           | 3.34286600  | -2.67789400 |
| H    | 0.51503200           | 3.05703000  | -3.73384500 |
| H    | 0.18354300           | 4.34973900  | -2.59807900 |
| H    | 1.64833100           | 3.32903100  | -2.38818000 |
| C    | -1.68533500          | 2.48115300  | -1.90084600 |
| H    | -2.04213500          | 2.63822100  | -2.92167600 |
| H    | -2.16514200          | 1.60837900  | -1.45828700 |
| H    | -1.96951200          | 3.37775500  | -1.33747800 |

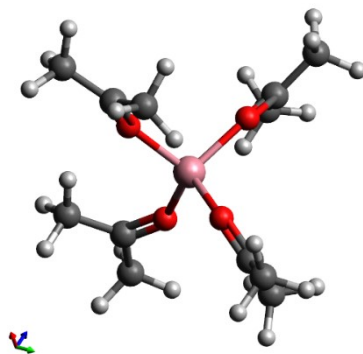

---

| Molecule                            | Multiplicity | E (no zpe)   | E (w/ zpe)   |
|-------------------------------------|--------------|--------------|--------------|
| Ni <sup>2+</sup> (Ace) <sub>3</sub> | 3            | -2087.236437 | -2086.979486 |

| Frequency | Intensity |
|-----------|-----------|
| 20.6      | 0.16      |
| 22.2      | 0.15      |
| 28.6      | 2.05      |
| 42.3      | 2.41      |
| 43.2      | 2.01      |
| 43.7      | 1.57      |
| 97.3      | 3.41      |
| 98.5      | 2.06      |
| 105.8     | 4.55      |
| 114.8     | 0.13      |
| 124.8     | 1.44      |
| 125.6     | 2.4       |
| 126.3     | 1.26      |
| 134.1     | 0.4       |
| 136       | 0.36      |
| 153.4     | 6.19      |
| 154.1     | 7.87      |
| 199.8     | 18.06     |
| 261.4     | 5.36      |
| 319.4     | 18.21     |
| 320.1     | 17.35     |
| 437.6     | 3.81      |
| 452.3     | 25.46     |
| 453.1     | 24.38     |
| 501.3     | 1.48      |
| 501.9     | 0.94      |
| 505.1     | 0.79      |

|        |        |
|--------|--------|
| 576.8  | 2.15   |
| 587    | 59.22  |
| 587.8  | 58.41  |
| 838.2  | 0.25   |
| 839.4  | 1.53   |
| 842.5  | 1.64   |
| 885.4  | 6.63   |
| 887.8  | 4.93   |
| 887.9  | 8.57   |
| 937.1  | 3.44   |
| 940.4  | 3.63   |
| 940.9  | 3.83   |
| 1099.7 | 2.79   |
| 1100.1 | 4.96   |
| 1100.3 | 5.2    |
| 1109.8 | 6.36   |
| 1110.7 | 19.06  |
| 1112.3 | 23.96  |
| 1306   | 36.24  |
| 1306.2 | 38.22  |
| 1306.8 | 7.8    |
| 1388.9 | 100.32 |
| 1389.3 | 106.18 |
| 1389.8 | 28.04  |
| 1406.9 | 70.77  |
| 1407.3 | 80.34  |
| 1407.4 | 123.81 |
| 1434   | 76.58  |
| 1434.4 | 82.24  |
| 1434.9 | 18.67  |
| 1448.9 | 12.15  |
| 1449.2 | 8.95   |
| 1450.1 | 6.86   |
| 1470.1 | 28.69  |
| 1470.6 | 65.38  |
| 1470.6 | 55.8   |
| 1483.3 | 36.2   |
| 1485.1 | 34.07  |
| 1485.6 | 34.82  |
| 1662.8 | 761.58 |
| 1663.8 | 757.38 |
| 1690.6 | 70.83  |
| 3036.2 | 28.94  |
| 3036.6 | 28.12  |
| 3037.9 | 23.31  |

|        |       |
|--------|-------|
| 3044.1 | 22.35 |
| 3044.5 | 19.91 |
| 3045.7 | 22.78 |
| 3113.9 | 1.08  |
| 3114.3 | 0.56  |
| 3114.5 | 0.91  |
| 3120.5 | 8.14  |
| 3120.6 | 6.73  |
| 3120.8 | 9.56  |
| 3173.4 | 3.89  |
| 3174   | 3.35  |
| 3176.2 | 3.97  |
| 3188.1 | 1.79  |
| 3188.4 | 2.07  |
| 3188.9 | 2.03  |

| Atom | Standard Orientation |             |             |
|------|----------------------|-------------|-------------|
| C    | 0.00000000           | 0.00000000  | 0.00000000  |
| C    | 0.15701300           | -1.32391400 | -0.64912400 |
| O    | 1.27141400           | -1.72572000 | -1.04877900 |
| Ni   | 3.03994400           | -1.15800900 | -1.38585300 |
| O    | 3.42095000           | 0.65577700  | -1.01924400 |
| C    | 4.33684800           | 1.42007400  | -0.64537300 |
| C    | 5.63000200           | 0.89388600  | -0.14605200 |
| H    | 6.39061400           | 1.10557800  | -0.90837500 |
| H    | 5.93969200           | 1.43942100  | 0.74896700  |
| H    | 5.59987600           | -0.17791200 | 0.04471900  |
| C    | 4.10954500           | 2.88117600  | -0.70593300 |
| H    | 3.94066700           | 3.23194600  | 0.32113100  |
| H    | 5.00807400           | 3.39425400  | -1.05745700 |
| H    | 3.24635800           | 3.13315000  | -1.31834600 |
| O    | 4.41064700           | -2.40499300 | -1.02689000 |
| C    | 4.61251400           | -3.56838100 | -0.61621300 |
| C    | 5.96083800           | -4.15452900 | -0.78040500 |
| H    | 6.24318400           | -4.72696700 | 0.10651500  |
| H    | 5.90320000           | -4.87781200 | -1.60538200 |
| H    | 6.70644400           | -3.40050800 | -1.02332700 |
| C    | 3.53605800           | -4.35842100 | 0.02881300  |
| H    | 3.74594600           | -4.38515800 | 1.10581000  |
| H    | 2.54823300           | -3.92962400 | -0.13589100 |
| H    | 3.56998700           | -5.39577900 | -0.31272500 |
| C    | -1.02015400          | -2.20130200 | -0.83051600 |
| H    | -1.66522100          | -2.16790500 | 0.05089700  |
| H    | -1.61175100          | -1.78578900 | -1.65778000 |
| H    | -0.73459700          | -3.22142800 | -1.07808200 |

|   |             |             |             |
|---|-------------|-------------|-------------|
| H | -0.91446100 | 0.48693700  | -0.34712100 |
| H | -0.13652700 | -0.17395500 | 1.07511300  |
| H | 0.86408600  | 0.64526200  | -0.15425600 |

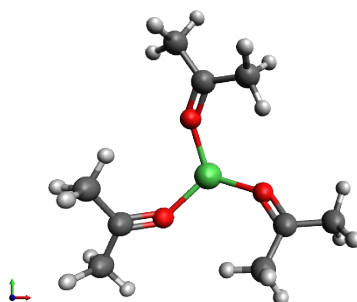


---

|                                     |              |              |             |
|-------------------------------------|--------------|--------------|-------------|
| Molecule                            | Multiplicity | E (no zpe)   | E (w/ zpe)  |
| Ni <sup>2+</sup> (Ace) <sub>4</sub> | 3            | -2280.463433 | -2280.12025 |

| Frequency | Intensity |
|-----------|-----------|
| 9.4       | 0.02      |
| 20.2      | 1.39      |
| 22.1      | 0.68      |
| 30.6      | 0.78      |
| 33.2      | 2.78      |
| 38.7      | 0.94      |
| 42.3      | 0.43      |
| 49        | 1.93      |
| 58.9      | 2.95      |
| 87.7      | 1.75      |
| 94        | 0.81      |
| 106.7     | 2.37      |
| 112       | 2.72      |
| 115.1     | 0.47      |
| 118.7     | 0.71      |
| 121.3     | 0.72      |
| 129.8     | 0.69      |
| 134.1     | 0.13      |
| 136.6     | 0.2       |
| 138.8     | 0.34      |
| 142.7     | 1.34      |
| 154.9     | 4.41      |
| 168.6     | 2.57      |
| 184.7     | 10.69     |
| 192.5     | 12.75     |

|        |       |
|--------|-------|
| 229    | 0.61  |
| 271.9  | 12.39 |
| 291    | 18.16 |
| 306.1  | 49.98 |
| 422.4  | 5.54  |
| 428.5  | 5.19  |
| 434.1  | 35.94 |
| 436.5  | 18.5  |
| 501.1  | 1.1   |
| 502.6  | 0.43  |
| 504    | 0.76  |
| 505.9  | 2.51  |
| 572.3  | 31.2  |
| 576.5  | 30.58 |
| 580.9  | 24.42 |
| 599.6  | 30.9  |
| 829.9  | 0.71  |
| 834.4  | 1.29  |
| 834.7  | 1.62  |
| 837.4  | 1.36  |
| 887.4  | 4.43  |
| 887.9  | 4.85  |
| 888.4  | 2.3   |
| 889.6  | 1.99  |
| 936.3  | 2.59  |
| 937.8  | 3.03  |
| 938.3  | 2.96  |
| 942.5  | 3.27  |
| 1093.6 | 2.26  |
| 1098.2 | 5.02  |
| 1099.1 | 2.54  |
| 1102.1 | 1.42  |
| 1114.2 | 12.18 |
| 1115.7 | 3.13  |
| 1117.1 | 26.82 |
| 1119   | 12.01 |
| 1296.8 | 5.31  |
| 1298.2 | 40.58 |
| 1299.4 | 53.16 |
| 1302.8 | 17.51 |
| 1395.2 | 63.79 |
| 1395.7 | 87.22 |
| 1396.5 | 69.06 |
| 1396.9 | 15.35 |
| 1411.5 | 63.56 |

|        |        |
|--------|--------|
| 1412.8 | 93.13  |
| 1412.8 | 18.12  |
| 1413.5 | 170.1  |
| 1439.9 | 65.5   |
| 1444   | 91     |
| 1444.7 | 16.09  |
| 1446.8 | 43.36  |
| 1452.7 | 5.87   |
| 1454.2 | 3.67   |
| 1456.5 | 6.38   |
| 1456.6 | 8.27   |
| 1470.8 | 54.27  |
| 1472   | 20.99  |
| 1472.6 | 32.54  |
| 1473.5 | 44.63  |
| 1485.6 | 25.18  |
| 1487.7 | 31.63  |
| 1490.2 | 14.57  |
| 1494.8 | 37.94  |
| 1703.4 | 393.64 |
| 1706.1 | 910.32 |
| 1708.6 | 642.44 |
| 1736.8 | 8.29   |
| 3043.6 | 16.51  |
| 3044.5 | 7.29   |
| 3044.6 | 17.42  |
| 3045.7 | 9.03   |
| 3049.5 | 7.19   |
| 3050.2 | 15.04  |
| 3050.6 | 16.83  |
| 3050.7 | 6.19   |
| 3115.6 | 0.16   |
| 3117.9 | 0.76   |
| 3118.7 | 0.16   |
| 3119   | 0.62   |
| 3122.2 | 2.36   |
| 3124.6 | 3.14   |
| 3126.5 | 2.77   |
| 3127.3 | 3.7    |
| 3165.7 | 2.66   |
| 3175.9 | 3.87   |
| 3178.8 | 3.23   |
| 3183.8 | 0.82   |
| 3185.2 | 5.34   |
| 3186.1 | 1.25   |

3187.1  
3187.3

1.51  
1.69

| Atom | Standard Orientation |             |             |
|------|----------------------|-------------|-------------|
| Ni   | 0.00000000           | 0.00000000  | 0.00000000  |
| O    | -1.79138100          | -0.57076100 | -0.55641000 |
| C    | -2.88832800          | -0.15397300 | -0.95941500 |
| C    | -3.90172800          | -1.12730400 | -1.43958200 |
| H    | -4.89895000          | -0.85309200 | -1.08743800 |
| H    | -3.93369200          | -1.06338500 | -2.53460100 |
| H    | -3.64927400          | -2.14514500 | -1.15015500 |
| C    | -3.21891200          | 1.29750800  | -0.97705100 |
| H    | -3.93364200          | 1.48955400  | -0.16796500 |
| H    | -2.33770300          | 1.92242500  | -0.83970800 |
| H    | -3.73309800          | 1.55795100  | -1.90519100 |
| O    | -0.15903300          | 1.85919500  | 0.57015100  |
| C    | -0.31380600          | 2.54391900  | 1.59454400  |
| C    | -0.46456600          | 1.92819600  | 2.93925000  |
| H    | 0.10650900           | 2.49190200  | 3.68065900  |
| H    | -1.51761500          | 2.02326700  | 3.23176300  |
| H    | -0.18259500          | 0.87699100  | 2.94454800  |
| C    | -0.35356000          | 4.02389400  | 1.46763800  |
| H    | -1.16177600          | 4.43831300  | 2.07570700  |
| H    | 0.57713300           | 4.42514400  | 1.88752200  |
| H    | -0.44436800          | 4.33801600  | 0.42977500  |
| O    | 1.80901100           | -0.26346000 | -0.67908700 |
| C    | 2.90248500           | 0.27132400  | -0.91748200 |
| C    | 3.93837100           | -0.48934700 | -1.66009500 |
| H    | 4.00488900           | -0.06625400 | -2.67027000 |
| H    | 4.92089300           | -0.34492100 | -1.20372200 |
| H    | 3.68893400           | -1.54579800 | -1.73094900 |
| C    | 3.20363400           | 1.65851800  | -0.47007400 |
| H    | 3.84749900           | 1.58949700  | 0.41525600  |
| H    | 3.77871900           | 2.19221900  | -1.22945200 |
| H    | 2.29795800           | 2.20708900  | -0.21615400 |
| O    | 0.15409500           | -1.09469500 | 1.62886100  |
| C    | 0.19694100           | -2.32076700 | 1.80986800  |
| C    | 0.32553000           | -2.84369100 | 3.19415100  |
| H    | -0.63644100          | -3.28660400 | 3.47949500  |
| H    | 1.05748300           | -3.65471500 | 3.22840900  |
| H    | 0.58405200           | -2.05672700 | 3.89937800  |
| C    | 0.13780300           | -3.28830000 | 0.67794600  |
| H    | -0.41139000          | -4.18728800 | 0.96314700  |
| H    | -0.29949800          | -2.85166000 | -0.22039400 |
| H    | 1.16471400           | -3.60427000 | 0.45807100  |



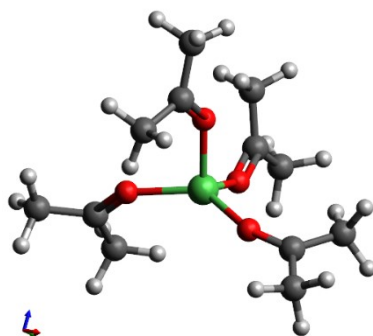


---

| Molecule                       | Multiplicity | E (no zpe)   | E (w/ zpe)   |
|--------------------------------|--------------|--------------|--------------|
| $\text{Cu}^{2+}(\text{Ace})_3$ | 2            | -2219.413417 | -2219.156532 |

| Frequency | Intensity |
|-----------|-----------|
| 16.1      | 0.78      |
| 20.9      | 1.63      |
| 29.6      | 2.62      |
| 38.4      | 2.5       |
| 40.9      | 0.55      |
| 47.1      | 3.43      |
| 73.2      | 0.32      |
| 98.2      | 2.46      |
| 100.2     | 2.01      |
| 107.2     | 1.67      |
| 119.5     | 0.19      |
| 121.4     | 0.77      |
| 128.6     | 0.4       |
| 146.1     | 0.57      |
| 150.4     | 0.48      |
| 165       | 1.33      |
| 195.1     | 3.29      |
| 204.7     | 14.94     |
| 253.6     | 0.71      |
| 297       | 7.86      |
| 335.9     | 23.13     |
| 431.2     | 5.52      |
| 438.1     | 4.54      |
| 463       | 34.8      |
| 500.6     | 0.42      |
| 504       | 0.81      |
| 508.5     | 1.29      |
| 585.1     | 45.35     |

|        |         |
|--------|---------|
| 598    | 55.69   |
| 604.2  | 11.18   |
| 838.5  | 0.47    |
| 839.1  | 0.94    |
| 841.6  | 2.46    |
| 881.2  | 1.62    |
| 884.9  | 11.61   |
| 889.9  | 11.58   |
| 929.7  | 2.73    |
| 938    | 3.7     |
| 942.8  | 3.67    |
| 1093.3 | 0.1     |
| 1096.3 | 1.79    |
| 1101.8 | 1.06    |
| 1108.9 | 0.55    |
| 1109.8 | 33.07   |
| 1113.1 | 13.09   |
| 1302   | 22.42   |
| 1302.9 | 12.71   |
| 1305.5 | 30.38   |
| 1385.9 | 68.89   |
| 1387.3 | 58.2    |
| 1390.7 | 59.96   |
| 1401.9 | 82.14   |
| 1404.7 | 74.61   |
| 1405.4 | 103.64  |
| 1432.9 | 68.9    |
| 1433.4 | 58.56   |
| 1436.1 | 17.76   |
| 1447.1 | 8.13    |
| 1449.1 | 14.48   |
| 1451.4 | 13.8    |
| 1469.3 | 105.78  |
| 1470.3 | 10.56   |
| 1472.7 | 55.73   |
| 1478.6 | 35.79   |
| 1483.9 | 33.4    |
| 1486.5 | 39.29   |
| 1662.5 | 1074.32 |
| 1666   | 399.77  |
| 1686.7 | 42.49   |
| 3035.5 | 24.12   |
| 3035.9 | 31.8    |
| 3040.6 | 17.38   |
| 3041.9 | 35.55   |

|        |       |
|--------|-------|
| 3044.2 | 20.44 |
| 3048.5 | 26.36 |
| 3112.9 | 1.01  |
| 3113.5 | 0.73  |
| 3115.1 | 0.71  |
| 3119   | 8.24  |
| 3120.9 | 5.25  |
| 3121   | 11.43 |
| 3159.5 | 4.58  |
| 3165.2 | 3.69  |
| 3177.3 | 4.2   |
| 3187.7 | 2.16  |
| 3188.6 | 2.97  |
| 3189.1 | 2.53  |

| Atom | Standard Orientation |             |             |
|------|----------------------|-------------|-------------|
| C    | 0.00000000           | 0.00000000  | 0.00000000  |
| C    | 0.43633300           | -1.32619500 | 0.49938800  |
| O    | 1.63894500           | -1.56305800 | 0.73606300  |
| Cu   | 3.40189200           | -1.00930300 | 0.63521200  |
| O    | 3.48107900           | 0.83478800  | 0.11203500  |
| C    | 3.92213300           | 1.85939100  | 0.66991300  |
| C    | 4.56506900           | 1.82452700  | 2.00905300  |
| H    | 5.61767700           | 2.10808400  | 1.89587900  |
| H    | 4.11873600           | 2.58904400  | 2.65185700  |
| H    | 4.50181800           | 0.84885500  | 2.49178200  |
| C    | 3.78022700           | 3.15597000  | -0.03680700 |
| H    | 2.99714000           | 3.73098600  | 0.47425600  |
| H    | 4.69693200           | 3.74397700  | 0.05436000  |
| H    | 3.50292200           | 3.01879000  | -1.07983300 |
| O    | 5.14834400           | -1.59483100 | 0.96149400  |
| C    | 6.22696100           | -1.75689100 | 0.35228100  |
| C    | 7.32463300           | -2.46803600 | 1.04421700  |
| H    | 7.82793700           | -3.15266700 | 0.35667600  |
| H    | 8.07466300           | -1.71901700 | 1.33215600  |
| H    | 6.97406400           | -2.98549100 | 1.93462600  |
| C    | 6.42115400           | -1.26318100 | -1.03393200 |
| H    | 6.37313900           | -2.13323100 | -1.70198300 |
| H    | 5.66091400           | -0.54172200 | -1.33486000 |
| H    | 7.42221800           | -0.84375400 | -1.15689100 |
| C    | -0.55455600          | -2.40021300 | 0.72875300  |
| H    | -1.47253200          | -1.98957900 | 1.15587900  |
| H    | -0.82692600          | -2.80534800 | -0.25567800 |
| H    | -0.15072000          | -3.20174000 | 1.34375000  |
| H    | -0.75687600          | -0.12205000 | -0.77870700 |

|   |             |            |             |
|---|-------------|------------|-------------|
| H | -0.49764800 | 0.51627600 | 0.83090900  |
| H | 0.83323400  | 0.60207400 | -0.35926500 |

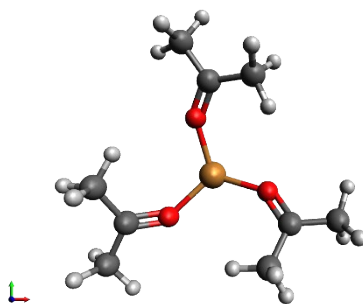


---

|                                |              |              |              |
|--------------------------------|--------------|--------------|--------------|
| Molecule                       | Multiplicity | E (no zpe)   | E (w/ zpe)   |
| $\text{Cu}^{2+}(\text{Ace})_4$ | 2            | -2412.634387 | -2412.290969 |

| Frequency | Intensity |
|-----------|-----------|
| 11        | 0.17      |
| 33.3      | 7.22      |
| 33.8      | 0         |
| 40.1      | 1.66      |
| 45.8      | 0         |
| 46.5      | 1.06      |
| 49.5      | 0         |
| 51.4      | 2.17      |
| 61.2      | 4.77      |
| 95        | 0         |
| 96.4      | 0         |
| 102.1     | 0.38      |
| 102.6     | 0         |
| 114.7     | 0         |
| 115.6     | 1.34      |
| 116.5     | 1.51      |
| 117.8     | 0         |
| 123.3     | 0.48      |
| 126.4     | 0         |
| 133.5     | 0.75      |
| 146.3     | 0         |
| 186.2     | 0         |
| 192.6     | 3.31      |
| 222.2     | 9.62      |
| 228.4     | 13.61     |
| 238.5     | 0         |

|        |       |
|--------|-------|
| 241.1  | 0     |
| 313    | 36.36 |
| 314.3  | 35.19 |
| 418.6  | 0     |
| 424.2  | 0     |
| 428.2  | 22.22 |
| 434.4  | 31.13 |
| 503    | 0     |
| 503.8  | 2.43  |
| 505.4  | 0     |
| 506.6  | 3.22  |
| 580.9  | 0     |
| 588.1  | 0     |
| 596.6  | 29.73 |
| 600.1  | 57.29 |
| 832.8  | 0     |
| 834.8  | 1.86  |
| 835.5  | 0     |
| 837    | 1.88  |
| 885.8  | 0     |
| 886.2  | 8.22  |
| 887    | 0     |
| 887.4  | 9.08  |
| 931.6  | 0     |
| 931.7  | 4.63  |
| 936.5  | 0     |
| 936.6  | 6     |
| 1094.2 | 0     |
| 1095.8 | 4.4   |
| 1096.7 | 0     |
| 1097.2 | 1.78  |
| 1112.6 | 0     |
| 1114.6 | 32    |
| 1115.5 | 18.95 |
| 1116.5 | 0     |
| 1295.7 | 26.95 |
| 1296.4 | 0     |
| 1298.3 | 56.73 |
| 1298.8 | 0     |
| 1394.8 | 0     |
| 1396   | 87.64 |
| 1396.2 | 128.1 |
| 1398.1 | 0     |
| 1411.7 | 35.35 |
| 1412.3 | 0     |

|        |        |
|--------|--------|
| 1413.3 | 0      |
| 1413.4 | 301.86 |
| 1442   | 83.8   |
| 1442.2 | 0      |
| 1443.1 | 51.99  |
| 1443.1 | 0      |
| 1452.9 | 0      |
| 1453   | 3.47   |
| 1453.6 | 0      |
| 1453.8 | 36.52  |
| 1472.8 | 101.09 |
| 1473.1 | 0      |
| 1474.6 | 74.79  |
| 1475   | 0      |
| 1483.1 | 0      |
| 1483.4 | 49.14  |
| 1489.8 | 0      |
| 1490.1 | 75.5   |
| 1699.6 | 0      |
| 1706   | 801.45 |
| 1715.5 | 990.58 |
| 1738.9 | 0      |
| 3044.1 | 0      |
| 3044.1 | 24.08  |
| 3045.5 | 0      |
| 3045.5 | 14.67  |
| 3049.6 | 26.92  |
| 3049.7 | 0      |
| 3051.7 | 37.01  |
| 3051.7 | 0      |
| 3117.7 | 0.21   |
| 3117.7 | 0      |
| 3119.2 | 0      |
| 3119.3 | 0.71   |
| 3123.5 | 0      |
| 3123.6 | 5.71   |
| 3125.2 | 0      |
| 3125.2 | 10.3   |
| 3162.9 | 0      |
| 3162.9 | 17.6   |
| 3174.3 | 0      |
| 3174.3 | 5.51   |
| 3187.2 | 2.25   |
| 3187.2 | 0      |
| 3187.4 | 0      |

| Atom | Standard Orientation |             |             |
|------|----------------------|-------------|-------------|
| Cu   | 0.00000000           | 0.00000000  | 0.00000000  |
| O    | -1.73213900          | 0.64717200  | 0.61665500  |
| C    | -2.63635300          | 1.36469600  | 0.16391500  |
| C    | -3.75835100          | 1.74961900  | 1.05899400  |
| H    | -3.63419800          | 2.80909200  | 1.31532700  |
| H    | -4.71418500          | 1.67167300  | 0.53524700  |
| H    | -3.76038700          | 1.15972300  | 1.97311800  |
| C    | -2.64496100          | 1.83930100  | -1.24815200 |
| H    | -2.95883600          | 2.88455000  | -1.29708600 |
| H    | -1.67970600          | 1.71496500  | -1.73751000 |
| H    | -3.40999700          | 1.26990200  | -1.78997900 |
| O    | 0.56038500           | 1.83295400  | -0.37552500 |
| C    | 1.41518800           | 2.60623400  | 0.07736500  |
| C    | 2.22484900           | 2.27572200  | 1.28367400  |
| H    | 3.27797200           | 2.51093800  | 1.11107200  |
| H    | 1.89617500           | 2.92501600  | 2.10319900  |
| H    | 2.11133600           | 1.23581200  | 1.59053100  |
| C    | 1.63694100           | 3.91105900  | -0.59818900 |
| H    | 1.75028500           | 4.71322000  | 0.13470700  |
| H    | 2.58839300           | 3.84893000  | -1.14078600 |
| H    | 0.84110800           | 4.13455600  | -1.30542500 |
| O    | 1.73213900           | -0.64717200 | -0.61665500 |
| C    | 2.63635300           | -1.36469600 | -0.16391500 |
| C    | 3.75835100           | -1.74961900 | -1.05899400 |
| H    | 4.71418500           | -1.67167300 | -0.53524700 |
| H    | 3.63419800           | -2.80909200 | -1.31532700 |
| H    | 3.76038700           | -1.15972300 | -1.97311800 |
| C    | 2.64496100           | -1.83930100 | 1.24815200  |
| H    | 2.95883600           | -2.88455000 | 1.29708600  |
| H    | 3.40999700           | -1.26990200 | 1.78997900  |
| H    | 1.67970600           | -1.71496500 | 1.73751000  |
| O    | -0.56038500          | -1.83295400 | 0.37552500  |
| C    | -1.41518800          | -2.60623400 | -0.07736500 |
| C    | -1.63694100          | -3.91105900 | 0.59818900  |
| H    | -2.58839300          | -3.84893000 | 1.14078600  |
| H    | -1.75028500          | -4.71322000 | -0.13470700 |
| H    | -0.84110800          | -4.13455600 | 1.30542500  |
| C    | -2.22484900          | -2.27572200 | -1.28367400 |
| H    | -3.27797200          | -2.51093800 | -1.11107200 |
| H    | -2.11133600          | -1.23581200 | -1.59053100 |
| H    | -1.89617500          | -2.92501600 | -2.10319900 |

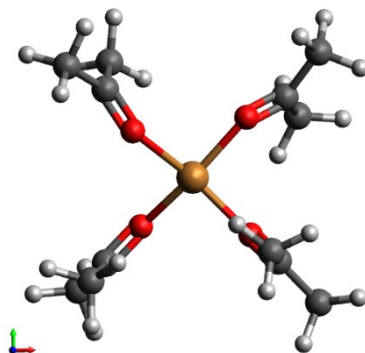

---

| Molecule                            | Multiplicity | E (no zpe)   | E (w/ zpe)   |
|-------------------------------------|--------------|--------------|--------------|
| Zn <sup>2+</sup> (Ace) <sub>3</sub> | 1            | -2358.306724 | -2358.049848 |

| Frequency | Intensity |
|-----------|-----------|
| 14.3      | 0.03      |
| 16.2      | 0.15      |
| 25.9      | 3.51      |
| 43        | 3.88      |
| 45.4      | 1.55      |
| 49.6      | 0.83      |
| 100.8     | 0.03      |
| 102.3     | 0.39      |
| 111.7     | 4.72      |
| 118.6     | 0.19      |
| 133.7     | 3.03      |
| 136.8     | 4.25      |
| 139.2     | 2.43      |
| 141       | 5.41      |
| 145.1     | 3.86      |
| 146.8     | 1.98      |
| 152.5     | 2.7       |
| 197.6     | 27.82     |
| 248.4     | 0.01      |
| 305.8     | 22.09     |
| 306.6     | 21.22     |
| 433.5     | 0.16      |
| 444       | 29.11     |
| 445.8     | 28.35     |
| 503.6     | 0.43      |
| 504.4     | 1.08      |
| 505.1     | 0.68      |
| 584.2     | 0.03      |
| 593.5     | 52.09     |



|        |        |
|--------|--------|
| 593.9  | 52.55  |
| 835.4  | 0      |
| 836.7  | 0.89   |
| 837.2  | 0.94   |
| 884.7  | 9.77   |
| 885.1  | 9.15   |
| 885.5  | 0.91   |
| 942.1  | 3.27   |
| 942.6  | 3.33   |
| 942.8  | 6.19   |
| 1097.2 | 7.81   |
| 1097.2 | 12.93  |
| 1097.4 | 10.17  |
| 1110.5 | 2.29   |
| 1110.9 | 9.15   |
| 1111.9 | 40.42  |
| 1308.7 | 39.39  |
| 1308.9 | 38.65  |
| 1309.9 | 0.8    |
| 1389.2 | 115.85 |
| 1389.6 | 117.12 |
| 1390.6 | 6      |
| 1409.3 | 5.63   |
| 1409.5 | 138.2  |
| 1410   | 181.78 |
| 1431   | 101.35 |
| 1432.7 | 104.68 |
| 1433.6 | 5.42   |
| 1447.9 | 3.42   |
| 1448.1 | 5.01   |
| 1449.3 | 14.96  |
| 1472.7 | 27.49  |
| 1473   | 50.93  |
| 1474   | 46.88  |
| 1487.5 | 8.5    |
| 1488.3 | 34.82  |
| 1488.9 | 70.39  |
| 1657.4 | 772.59 |
| 1657.6 | 766.96 |
| 1683.8 | 0.06   |
| 3034.7 | 10.4   |
| 3034.7 | 41.22  |
| 3034.8 | 28.14  |
| 3041.3 | 33.09  |
| 3041.4 | 14.59  |

|        |       |
|--------|-------|
| 3042.3 | 18.13 |
| 3114.1 | 1.49  |
| 3114.1 | 1.3   |
| 3114.3 | 1.32  |
| 3119.8 | 7.09  |
| 3120   | 7.56  |
| 3120.2 | 8.19  |
| 3165.3 | 2.89  |
| 3165.9 | 2.55  |
| 3168   | 2.64  |
| 3188.6 | 1.6   |
| 3189   | 1.69  |
| 3189.1 | 1.68  |

| Atom | Standard Orientation |             |             |
|------|----------------------|-------------|-------------|
| C    | 0.00000000           | 0.00000000  | 0.00000000  |
| C    | -0.17813200          | 1.42906600  | -0.35040100 |
| O    | -1.31280100          | 1.95424000  | -0.43571200 |
| Zn   | -3.13995300          | 1.39881400  | -0.32205600 |
| O    | -3.56665700          | -0.46602600 | -0.28215200 |
| C    | -4.59120300          | -1.18326000 | -0.36219600 |
| C    | -5.93406300          | -0.60733500 | -0.61074700 |
| H    | -6.20438000          | -0.83918100 | -1.64930300 |
| H    | -6.68235700          | -1.10303200 | 0.01255900  |
| H    | -5.96588900          | 0.47256000  | -0.46376400 |
| C    | -4.44012300          | -2.64571700 | -0.20480300 |
| H    | -4.77741600          | -2.89964200 | 0.80979800  |
| H    | -5.10218000          | -3.18140500 | -0.88883900 |
| H    | -3.40593700          | -2.96238900 | -0.32186400 |
| O    | -4.54261400          | 2.69918500  | -0.27324000 |
| C    | -4.64656500          | 3.94788000  | -0.24875900 |
| C    | -6.00110600          | 4.54085800  | -0.26203000 |
| H    | -6.04645600          | 5.42375800  | 0.37940500  |
| H    | -6.19043900          | 4.89494600  | -1.28501800 |
| H    | -6.76506500          | 3.81423000  | 0.00632000  |
| C    | -3.45897100          | 4.83362600  | -0.20765900 |
| H    | -3.39536200          | 5.25339800  | 0.80472900  |
| H    | -2.53099800          | 4.31019000  | -0.43906100 |
| H    | -3.59761400          | 5.68568200  | -0.87792900 |
| C    | 1.00856900           | 2.27322600  | -0.60620100 |
| H    | 1.82288300           | 2.01769400  | 0.07554900  |
| H    | 1.36714200           | 2.03093700  | -1.61635900 |
| H    | 0.77008800           | 3.33377200  | -0.56283000 |
| H    | 0.78417100           | -0.44823700 | -0.61506200 |
| H    | 0.36625000           | -0.04183800 | 1.03420000  |

H                    -0.92396900           -0.57374300           -0.07686200

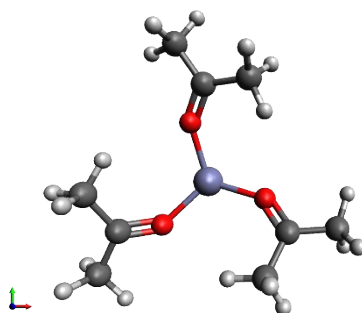

---

| Molecule                            | Multiplicity | E (no zpe)   | E (w/ zpe)   |
|-------------------------------------|--------------|--------------|--------------|
| Zn <sup>2+</sup> (Ace) <sub>4</sub> | 1            | -2551.532334 | -2551.189405 |

| Frequency | Intensity |
|-----------|-----------|
| 8.3       | 0.58      |
| 18.9      | 1.03      |
| 19.8      | 0.47      |
| 27.4      | 2.24      |
| 30.8      | 0.4       |
| 34.5      | 1.14      |
| 36.3      | 1.12      |
| 44.4      | 2         |
| 49.9      | 1.62      |
| 89.6      | 1.04      |
| 95.8      | 0.82      |
| 102.8     | 2.07      |
| 106.9     | 2.66      |
| 110.9     | 1.56      |
| 112.8     | 1.35      |
| 125       | 1.56      |
| 126.6     | 1.1       |
| 133.4     | 0.52      |
| 134.4     | 0.16      |
| 138.8     | 1.27      |
| 138.9     | 0.43      |
| 148.9     | 11.06     |
| 154.8     | 3.39      |
| 172.8     | 11.06     |
| 185.9     | 34.57     |
| 241.6     | 0.07      |
| 283.9     | 21.63     |

|        |        |
|--------|--------|
| 285    | 23.64  |
| 288.3  | 21.56  |
| 426.9  | 0.9    |
| 430.1  | 16.32  |
| 432.4  | 20.22  |
| 435.2  | 19.87  |
| 502.6  | 0.98   |
| 503.1  | 1.03   |
| 503.9  | 0.62   |
| 505.1  | 1.68   |
| 579.2  | 17.07  |
| 583.9  | 23.03  |
| 587.9  | 47.85  |
| 593.3  | 39.8   |
| 833.5  | 0.78   |
| 834.7  | 0.75   |
| 835.2  | 1.14   |
| 836.4  | 1.5    |
| 886.5  | 4.36   |
| 886.8  | 5.58   |
| 887.3  | 3.63   |
| 887.8  | 1.46   |
| 937.3  | 3.27   |
| 937.7  | 3.17   |
| 939.7  | 3.36   |
| 942    | 3.7    |
| 1097.5 | 6.46   |
| 1097.8 | 4.14   |
| 1099.7 | 5.16   |
| 1100   | 3.85   |
| 1115.6 | 2.53   |
| 1116   | 8.15   |
| 1117.8 | 25.44  |
| 1118.5 | 18.22  |
| 1299.2 | 8.98   |
| 1299.7 | 45.74  |
| 1301.6 | 43.2   |
| 1302.7 | 24.89  |
| 1395.3 | 83.59  |
| 1395.7 | 82.64  |
| 1396.2 | 69.11  |
| 1396.8 | 15.43  |
| 1413.4 | 38.73  |
| 1414   | 131.71 |
| 1414.3 | 81.73  |

|        |        |
|--------|--------|
| 1414.6 | 118.56 |
| 1439.3 | 74.06  |
| 1441.9 | 66.9   |
| 1443.3 | 42.64  |
| 1444.7 | 48.42  |
| 1451.3 | 3.42   |
| 1453.1 | 2.49   |
| 1453.7 | 7.66   |
| 1455   | 3.24   |
| 1471.8 | 41.02  |
| 1473   | 24.78  |
| 1473.5 | 43.56  |
| 1474.3 | 28.3   |
| 1489.2 | 25.84  |
| 1489.5 | 26.76  |
| 1492   | 16.9   |
| 1492.8 | 48.16  |
| 1699.8 | 653.11 |
| 1704.4 | 654.6  |
| 1707.6 | 583    |
| 1736.4 | 43.72  |
| 3042.3 | 15.1   |
| 3043.1 | 8.98   |
| 3043.3 | 10.66  |
| 3043.8 | 13.18  |
| 3048   | 11.24  |
| 3048.6 | 14.98  |
| 3048.8 | 17.22  |
| 3049.5 | 9.09   |
| 3117.1 | 0.26   |
| 3117.1 | 0.32   |
| 3118.1 | 0.29   |
| 3118.7 | 0.39   |
| 3123.5 | 3      |
| 3123.8 | 4.55   |
| 3124.8 | 2.7    |
| 3125.2 | 4.03   |
| 3161.3 | 4.39   |
| 3168.5 | 2.27   |
| 3172.2 | 1.82   |
| 3173.9 | 1.67   |
| 3185.3 | 1.59   |
| 3186.8 | 1.39   |
| 3187.7 | 1.35   |
| 3188   | 1.54   |

| Atom | Standard Orientation |             |             |
|------|----------------------|-------------|-------------|
| Zn   | 0.00000000           | 0.00000000  | 0.00000000  |
| O    | 1.67406900           | -1.02548600 | -0.21202500 |
| C    | 2.03342900           | -2.21399500 | -0.28536000 |
| C    | 3.47426800           | -2.52134600 | -0.46565100 |
| H    | 3.77188900           | -3.35653900 | 0.17328500  |
| H    | 3.61773100           | -2.86314600 | -1.49850100 |
| H    | 4.09880400           | -1.64876500 | -0.28608100 |
| C    | 1.06216200           | -3.33598100 | -0.19194200 |
| H    | 1.15378700           | -3.77024200 | 0.81159700  |
| H    | 0.03537100           | -3.00737500 | -0.34961900 |
| H    | 1.32486500           | -4.13120000 | -0.89291900 |
| O    | -1.56489100          | -1.08939300 | -0.49383800 |
| C    | -2.79740700          | -0.95718200 | -0.40270000 |
| C    | -3.41364500          | 0.26433100  | 0.18221700  |
| H    | -3.76378200          | 0.88864600  | -0.64905400 |
| H    | -4.29718800          | 0.00867700  | 0.77040700  |
| H    | -2.70744200          | 0.83535700  | 0.78506400  |
| C    | -3.67920900          | -2.04276800 | -0.89813900 |
| H    | -4.08833900          | -2.56616300 | -0.02469200 |
| H    | -4.53645700          | -1.62787000 | -1.43387900 |
| H    | -3.13497600          | -2.75128200 | -1.51894400 |
| O    | -0.01432700          | 1.62957600  | -1.10303000 |
| C    | 0.60819200           | 2.16474300  | -2.03403700 |
| C    | 1.79914700           | 1.52118800  | -2.65326700 |
| H    | 1.48665200           | 1.10197800  | -3.61762300 |
| H    | 2.56734800           | 2.26431700  | -2.87722500 |
| H    | 2.20434900           | 0.72453500  | -2.02983900 |
| C    | 0.15037800           | 3.47946500  | -2.54945400 |
| H    | 0.87019900           | 4.24000700  | -2.22243100 |
| H    | 0.17231400           | 3.49084200  | -3.64218700 |
| H    | -0.83804700          | 3.73541000  | -2.17425600 |
| O    | -0.23298700          | 0.56526300  | 1.87492600  |
| C    | 0.45520400           | 1.10179700  | 2.75737300  |
| C    | -0.14880700          | 1.37134400  | 4.08590900  |
| H    | 0.26560700           | 0.64548700  | 4.79676200  |
| H    | 0.14613000           | 2.35844700  | 4.45023300  |
| H    | -1.23154700          | 1.26919200  | 4.06202200  |
| C    | 1.87339900           | 1.48816600  | 2.51716100  |
| H    | 2.48867200           | 1.26478900  | 3.39141100  |
| H    | 2.28765200           | 1.00843500  | 1.62959900  |
| H    | 1.90548500           | 2.57684400  | 2.38871600  |

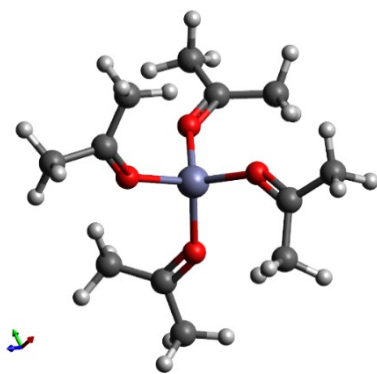

Table S3 Calculated bond lengths and angles of  $M^{2+}(\text{Ace})_4$ ,  $M = \text{Co}, \text{Ni}, \text{Cu}, \text{and Zn}$ ,  $\text{Cu}^+(\text{Ace})_4$ ,  $\text{Cu}^+(\text{Ace})(\text{N}_2)_k$  ( $k=0-2$ ) and  $\text{Al}^+(\text{Ace})(\text{N}_2)$ .

| Species                                 | Bond Length (Å)         |                         |                   |                            | Bond Angle (degree) |                           |                           |                         |
|-----------------------------------------|-------------------------|-------------------------|-------------------|----------------------------|---------------------|---------------------------|---------------------------|-------------------------|
|                                         | $r_{\text{M-O}}$        | $r_{\text{C=O}}$        | $r_{\text{C-C}}$  | $r_{\text{C-H}}$           | $r_{\text{M-N}}$    | $\text{L}_1\text{-M-L}_3$ | $\text{L}_2\text{-M-L}_4$ | C-C-C                   |
| $\text{C}_3\text{H}_6\text{O}$          | N/A                     | 1.214<br>1.211          | 1.520<br>1.517    | 1.103<br>1.089 to<br>1.095 | N/A                 | N/A                       | N/A                       | 116.0<br>116.3          |
| $\text{Co}^{2+}(\text{Ace})_4$          | 1.970 to<br>1.979       | 1.245<br>1.246<br>1.249 | 1.487 to<br>1.492 | 1.088 to<br>1.098          | N/A                 | 113.7                     | 109.0                     | 119.4<br>119.3          |
| $\text{Ni}^{2+}(\text{Ace})_4$          | 1.949<br>1.958<br>1.975 | 1.245<br>1.246<br>1.247 | 1.487 to<br>1.493 | 1.088 to<br>1.098          | N/A                 | 138.5                     | 107.4                     | 119.1 to<br>119.5       |
| $\text{Cu}^{2+}(\text{Ace})_4$          | 1.964<br>1.969          | 1.243<br>1.245          | 1.490<br>1.493    | 1.088 to<br>1.098          | N/A                 | 180.0                     | 180.0                     | 119.0<br>119.2          |
| $\text{Zn}^{2+}(\text{Ace})_4$          | 1.978 to<br>1.987       | 1.247 to<br>1.250       | 1.487 to<br>1.492 | 1.088 to<br>1.098          | N/A                 | 112.5                     | 107.4                     | 119.3                   |
| $\text{Cu}^+(\text{Ace})_4$             | 2.088<br>2.101<br>2.109 | 1.222 to<br>1.226       | 1.495 to<br>1.502 | 1.088 to<br>1.096          | N/A                 | 111.8                     | 105.7                     | 117.8<br>117.9<br>118.8 |
| $\text{Cu}^+(\text{Ace})(\text{N}_2)_2$ | 1.945                   | 1.234                   | 1.490<br>1.493    | 1.088 to<br>1.096          | 2.004<br>2.021      | N/A                       | N/A                       | 118.7                   |
| $\text{Cu}^+(\text{Ace})(\text{N}_2)$   | 1.869                   | 1.237                   | 1.486<br>1.489    | 1.087 to<br>1.096          | 1.888               | N/A                       | N/A                       | 119.0                   |
| $\text{Cu}^+(\text{Ace})$               | 1.890                   | 1.237                   | 1.486<br>1.489    | 1.087 to<br>1.096          | N/A                 | N/A                       | N/A                       | 119.0                   |
| $\text{Al}^+(\text{Ace})(\text{N}_2)^a$ | 1.937                   | 1.251                   | 1.485             | 1.088 to<br>1.099          | 3.381               | N/A                       | N/A                       | 120.0                   |

Calculations performed at zero Kelvin with the B3LYP+D3/6-311+G(d,p) level of theory unless indicated otherwise. <sup>a</sup> B3LYP+D3/6-311+G(d,p).<sup>26</sup>



Table S4: Properties of the metal cations and of the complexes calculated at the B3LYP+D3/6-311+G(d, p) (for  $Z < 37$ ) and B3LYP+D3/Def2-TZVP (for  $Z \geq 37$ ) level of theory.

| Species                | q | Multi | IE(M <sup>(n-1)+</sup> ) | Radii (Å) | q(M <sup>+</sup> ) | q(/Ace) | $\sigma^*$ (CO) | $\Delta\sigma^*$ (CO) | $\pi^*$ (CO) | $\Delta\pi^*$ (CO) | $\nu_{CO}$ | $-\Delta\nu_{CO}$ |
|------------------------|---|-------|--------------------------|-----------|--------------------|---------|-----------------|-----------------------|--------------|--------------------|------------|-------------------|
| Li <sup>+</sup> (Ace)  | 1 | 1     | 5.392                    | 0.96283   | 0.9632             | 0.0368  | 0.02309         | 0.0076                | 0.14694      | 0.05869            | 1711       | 76.1              |
| Na <sup>+</sup> (Ace)  | 1 | 1     | 5.139                    | 1.332761  | 0.98444            | 0.01556 | 0.02138         | 0.00589               | 0.13143      | 0.04318            | 1724.8     | 62.3              |
| K <sup>+</sup> (Ace)   | 1 | 1     | 4.34                     | 1.751214  | 0.98813            | 0.01187 | 0.02088         | 0.00539               | 0.12368      | 0.03543            | 1727.7     | 59.4              |
| Rb <sup>+</sup> (Ace)  | 1 | 1     | 4.177                    | 1.921683  | 0.97983            | 0.02017 | 0.02028         | 0.00479               | 0.11925      | 0.031              | 1733.5     | 53.6              |
| Cs <sup>+</sup> (Ace)  | 1 | 1     | 3.894                    | 2.131406  | 0.98301            | 0.01699 | 0.02048         | 0.00499               | 0.11815      | 0.0299             | 1731.9     | 55.2              |
| Mg <sup>+</sup> (Ace)  | 1 | 2     | 7.646                    | 2.02058   | 0.94674            | 0.05326 | 0.02665         | 0.01116               | 0.159        | 0.07075            | 1679.5     | 107.6             |
| Ca <sup>+</sup> (Ace)  | 1 | 2     | 6.113                    | 2.277188  | 0.95531            | 0.04469 | 0.02502         | 0.00953               | 0.15148      | 0.06323            | 1684.2     | 102.9             |
| Al <sup>+</sup> (Ace)  | 1 | 1     | 5.986                    | 2.059452  | 0.93803            | 0.06197 | 0.03177         | 0.01628               | 0.1749       | 0.08665            | 1627.5     | 159.6             |
| Ga <sup>+</sup> (Ace)  | 1 | 1     | 5.999                    | 2.005779  | 0.94266            | 0.05734 | 0.02905         | 0.01356               | 0.15541      | 0.06716            | 1651.2     | 135.9             |
| Cu <sup>+</sup> (Ace)  | 1 | 1     | 7.726                    | 1.705265  | 0.89908            | 0.10092 | 0.02903         | 0.01354               | 0.15755      | 0.0693             | 1665.9     | 121.2             |
| Zn <sup>+</sup> (Ace)  | 1 | 2     | 9.394                    | 1.931557  | 0.85901            | 0.14099 | 0.0267          | 0.01121               | 0.15505      | 0.0668             | 1644.3     | 142.8             |
| Ag <sup>+</sup> (Ace)  | 1 | 1     | 7.576                    | 1.882244  | 0.90285            | 0.09715 | 0.02938         | 0.01389               | 0.14236      | 0.05411            | 1678.2     | 108.9             |
| Mg <sup>2+</sup> (Ace) | 2 | 1     | 15.035                   | 1.158021  | 1.92846            | 0.07154 | 0.03429         | 0.0188                | 0.2316       | 0.14335            | 1568.3     | 218.8             |
| Ca <sup>2+</sup> (Ace) | 2 | 1     | 11.871                   | 1.560916  | 1.91143            | 0.08857 | 0.03264         | 0.01715               | 0.2113       | 0.12305            | 1572.2     | 214.9             |
| Si <sup>2+</sup> (Ace) | 2 | 1     | 11.03                    | 1.752159  | 1.92519            | 0.07481 | 0.03145         | 0.01596               | 0.19533      | 0.10708            | 1592.5     | 194.6             |
| Co <sup>2+</sup> (Ace) | 2 | 4     | 17.083                   | 1.575664  | 1.56568            | 0.43432 | 0.036           | 0.02051               | 0.24629      | 0.15804            | 1477.9     | 309.2             |
| Ni <sup>2+</sup> (Ace) | 2 | 3     | 18.169                   | 1.555686  | 1.45922            | 0.54078 | 0.03495         | 0.01946               | 0.24239      | 0.15414            | 1457.2     | 329.9             |
| Cu <sup>2+</sup> (Ace) | 2 | 2     | 20.292                   | 1.522092  | 1.18861            | 0.81139 | 0.02929         | N/A                   | 0.10684      | N/A                | 1506.7     | 280.4             |
| Zn <sup>2+</sup> (Ace) | 2 | 1     | 17.964                   | 1.496894  | 1.63151            | 0.36849 | 0.03759         | 0.0221                | 0.23169      | 0.14344            | 1441.8     | 345.3             |
